# Supplementary material for: AI framework for DRIVE model based mental health detection in text: a case study on how coping strategies are expressed during COVID-19
Source: PeerJ journal article supplement (doi:10.7717/peerj-cs.2828), 2025-04-25
Supplement: PythonNotebooksPeerJwithDocumentation.zip [file PythonNotebooksPeerJwithDocumentation.zip]

## Sheet: Sheet1
	Unnamed: 0.3	tweet_id	created_at	text	geo_name_x	profile_name_x	user_description_x	clean_tweet	Coping Category	Positive Coping Strategy	Negative Coping Strategy	TextBlobPolarity	TextBlobSubjectivity	VADER_pos	VADER_neg	VADER_neu	VADER_compound	retweet_count	reply_count	like_count	quote_count	followers_count	following_count	tweet_count	listed_count	hour	coping_class
983	983	1.19494e+18	2019-11-14	#وزارة_الصحة I HATE YOU SOOOO MUCH 😤	Al Adan	мσσиαατy 🇰🇼	Master in Information Studies /Bachelor Psychology /IF You Want to Achieve Greatness STOP Asking for Permission	i hate you so much face with steam from nose	Negative Coping		venting of emotions	-0.3	0.55	0	0.291	0.709	-0.5719	0	0	0	0	829	171	29408	0	11	1
982	982	1.1968e+18	2019-11-19	Japanese hair mask♥️👌	The Green Belt	Fattoma Ali Alrashed	what goes around comes around ✨	japanese hair mask heart suit ok hand	Positive Coping	engaging in relaxation techniques		0.25	0.25	0.706	0	0.294	0.8625	0	0	0	0	242	1351	13932	2	14	0
981	981	1.19945e+18	2019-11-26	nail polish done + eye mask + #JackRyan 💻💆🏻‍♀️🌸	Kuwait	أبـرار	Chemical engineer | @K_university | Tv.shows	nail polish done eye mask jackryan laptop woman getting massage cherry blossom	Positive Coping	engaging in relaxation techniques		0.4	0.7	0	0	1	0	0	0	2	0	457	90	53827	2	21	0
980	980	1.20067e+18	2019-11-30	Very excited and grateful to be at the launch of the #Kuwait #SickleCell guidelines agreed in partnership with #patients @Q8SCD @KUWAIT_MOH @Cindyalsherida https://t.co/ZbPlsQhUWE	Coast Strip A	Josu de la Fuente	Haematologist, red cell disorders and marrow failure. Working towards definitive cure: #BMT #genetherapy. @ImperialNHS @ImperialImmuno @TheEBMT @ApothecariesLDN	very excited and grateful to be at the launch of the kuwait sicklecell guidelines agreed in partnership with patients	Positive Coping	mindfullness practices		0.4875	0.975	0.335	0	0.665	0.7939	9	0	13	2	682	571	830	3	6	0
979	979	1.20067e+18	2019-11-30	I will be providing an update on the state of the art in gene 🧬 therapy and editing for #SickleCell disease and the work we are doing @ImperialNHS @imperialcollege in the plenary scientific session @Q8SCD @KUWAIT_MOH https://t.co/eKDZe9FQKG	Coast Strip A	Josu de la Fuente	Haematologist, red cell disorders and marrow failure. Working towards definitive cure: #BMT #genetherapy. @ImperialNHS @ImperialImmuno @TheEBMT @ApothecariesLDN	i will be providing an update on the state of the art in gene dna therapy and editing for sicklecell disease and the work we are doing in the plenary scientific session	Positive Coping	positive reframing		0	0	0	0	1	0	7	2	15	2	682	571	830	3	7	0
265	265	1.20134e+18	2019-12-02	In implementation of the Egyptian President’s initiative to treat one million Africans with virus C, an Egyptian medical team arrives in the state of Eritrea, opens a clinic, Long Live Egypt Africa, examines citizens, and trains medical teams, conducts the scanning and treatment process, Long Live Egypt tcoufxatx zqm	Al Mahboula	Mohammed sameer	‏أبوبدر	implementation egyptian president initiative treat one million africans virus c egyptian medical team arrives state eritrea opens clinic long live egypt africa examines citizens trains medical teams conducts scanning treatment process long live egypt	Positive Coping	mindfullness practices		0.028788	0.3	0.053	0	0.947	0.4019	0	0	0	0	477	461	48254	0	3	0
978	978	1.20362e+18	2019-12-08	Face mask 💆🏻‍♀️💓	Kifan	.	صدقة جاريه لكل فقيدٍ عزيزٍ على قلبي❤️.	face mask woman getting massage beating heart	Positive Coping	engaging in relaxation techniques		0.4	0.7	0.529	0	0.471	0.875	0	1	0	0	239	189	20215	3	10	0
977	977	1.2061e+18	2019-12-15	Doing a foot mask and it feels lovely!	Al Jahra	Independent Hoochie		doing a foot mask and it feels lovely	Positive Coping	engaging in relaxation techniques		0.5	0.75	0.352	0	0.648	0.5859	0	0	0	0	1171	905	111919	5	6	0
976	976	1.20722e+18	2019-12-18	@SyedaShehlaRaza Bhutto so da hay will not selll for long larkana condition is worst shame on you children are dying without vaccination and your talking about whole country politics big looters in this country	Fahad Al Ahmad	irshadkhan		bhutto so da hay will not sel for long larkana condition is worst shame on you children are dying without vaccination and your talking about whole country politics big looters in this country	Negative Coping		venting of emotions	-0.2125	0.475	0	0.188	0.812	-0.802	0	0	0	0	1	23	35	0	8	1
975	975	1.20798e+18	2019-12-20	@noufalmudhayan @BBCArabic @KUWAIT_MOH Hope this will make a difference🙏🏼	Zahra	Her highness, Ghadeer E teacher🧜🏽‍♀️	Ghadeer, Blessed beyond belief.. wife & mom of Fatimah & Waleed 👫I’m heliophilous 🌞🫒	hope this will make a difference folded hands	Positive Coping	positive reframing		0	0	0.225	0	0.775	0.4404	0	0	0	0	1257	396	28063	6	11	0
974	974	1.20838e+18	2019-12-21	Take the mask off when you speak to me ☕️	Faushon Paris	شوق	كايدٍ ماهو يلين لـ من بغاه .. يرتفع عن كل سقطات الزلل	take the mask off when you speak to me hot beverage	Negative Coping		denial	0.25	0.85	0	0	1	0	0	0	0	0	620	216	31917	4	13	1
973	973	1.20841e+18	2019-12-21	2019 lesson : take the flu vaccine if you go to see people with pneumonia regularly 🙂😷	Bayan	𝒩𝑜𝑜𝓇 𝐻.𝑀	KU - Medicine	lesson take the flu vaccine if you go to see people with pneumonia regularly sly smiling face face with medical mask	Positive Coping	problem-solving		-0.08333	0.083333	0.111	0.107	0.782	0.0276	0	1	0	0	290	291	1465	2	15	0
971	971	1.20877e+18	2019-12-22	Face mask💆🏻‍♀️✨	Kifan	.	صدقة جاريه لكل فقيدٍ عزيزٍ على قلبي❤️.	face mask woman getting massage sparkles	Positive Coping	engaging in relaxation techniques		0.4	0.7	0.223	0	0.777	0.3182	0	0	0	0	239	189	20215	3	15	0
972	972	1.20863e+18	2019-12-22	@Ahlam_alLayali Yes, he is anonymous with that mask that he’s wearing. Just the wrong way of anonymity.	Al Sharq	Jamal Ali	To Allah we belong and to Him we shall return.	yes he is anonymous with that mask that hes wearing just the wrong way of anonymity	Negative Coping		denial	-0.5	0.9	0.136	0.157	0.707	-0.1027	0	0	0	0	186	213	11686	1	6	1
970	970	1.2105e+18	2019-12-27	Mask On💆🏽‍♀️	Abdulla Al Salem	-Taiba AlMubaraki	National Assembly of Kuwait 🇰🇼	mask on woman getting massage	Positive Coping	engaging in relaxation techniques		0	0	0	0	1	0	0	0	0	0	471	181	12039	6	10	0
969	969	1.21138e+18	2019-12-29	Nothing feels better than a night face mask 🧖🏻‍♀️💆🏻‍♀️	Al Shuhada	ᴇɴɢ. ʙᴇᴅᴏᴏʀ	𝘈𝘜𝘔’𝘴 𝘈𝘭𝘶𝘮𝘯𝘢 & 𝘱𝘳𝘰𝘶𝘥 𝘵𝘰 𝘣𝘦, ᴇʟᴇᴄᴛʀɪᴄᴀʟ ᴇɴɢɪɴᴇᴇʀ, ᴀʀᴛɪꜱᴛ, ɢᴀᴍᴇʀ, & ᴀ ɴᴇʀᴅ ꜰᴏʀ ᴅɪꜱɴᴇʏ & ꜱᴜᴘᴇʀʜᴇʀᴏᴇꜱ 🎮🎨⚡️	nothing feels better than a night face mask woman in steamy room woman getting massage	Positive Coping	engaging in relaxation techniques		0.433333	0.633333	0	0.107	0.893	-0.3412	0	0	1	0	69	37	6438	0	20	0
968	968	1.21394e+18	2020-01-05	face mask time 💆🏼‍♀️	Al Ardhiya	TA		face mask time woman getting massage	Positive Coping	engaging in relaxation techniques		0	0	0	0	1	0	0	0	0	0	264	60	6685	0	21	0
967	967	1.21572e+18	2020-01-10	@AlyaaGad And my second package has arrived 🥰🥰 this time with the eye oil cant wait to try it on after tge mask 🙏🏻 and thanks for the lovely plant 💓 https://t.co/QognuLkqXQ	Bayan	Eman H	I'm Just Me❤! LaFoi ^.^! I am not trying to be perfect, just trying to be a better ME ♥!14/02/13 ♡	and my second package has arrived smiling face with hearts smiling face with hearts this time with the eye oil cant wait to try it on after tge mask folded hands and thanks for the lovely plant beating heart	Positive Coping	engaging in relaxation techniques		0.275	0.4125	0.469	0	0.531	0.9849	1	0	1	0	196	192	43599	2	19	0
966	966	1.21865e+18	2020-01-18	Trying to be calm and put on facial mask 💆🏻‍♀️ https://t.co/l3vePxx5n6	Bayan	Eman H	I'm Just Me❤! LaFoi ^.^! I am not trying to be perfect, just trying to be a better ME ♥!14/02/13 ♡	trying to be calm and put on facial mask woman getting massage	Positive Coping	engaging in relaxation techniques		0.233333	0.483333	0.141	0	0.859	0.3182	0	0	0	0	196	192	43599	2	21	0
965	965	1.21964e+18	2020-01-21	Why do you keep trying to hide under your mask? -love myself	Al Qusour	🧸 ❄️	A L I E N 👽 💜 || KU	why do you keep trying to hide under your mask love myself	Negative Coping		wishful thinking	0.5	0.6	0.264	0.107	0.629	0.5423	0	0	0	0	127	108	2108	0	15	1
264	264	1.21983e+18	2020-01-22	China confirms the transmission of the new Corona virus to humans and infecting more citizens. Therefore, we call on the Arab health ministers to pay attention to the development of the dangerous and contagious Corona virus in China. There is a patient who caused the infection of an entire medical team consisting of one person. Monitor travelers to your countries carefully and examine them for th…	Al Mahboula	Mohammed sameer	‏أبوبدر	china confirms transmission new corona virus humans infecting citizens therefore call arab health ministers pay attention development dangerous contagious corona virus china patient caused infection entire medical team consisting one person monitor travelers countries carefully examine corona virus	Positive Coping	seeking social support		-0.01061	0.579924	0.021	0.095	0.884	-0.6597	0	0	1	0	477	461	48254	0	3	0
963	963	1.22153e+18	2020-01-26	China isolated 1M Muslims, Allah isolated 40M Chinese! #فيروس_كورونا	Hawalli	𓆉فـاطمه لقيس	انسانه متواضعه وأعشق الحياه🤍. اللهم ارحم أبي واغفر له.	china isolated m muslims allah isolated m chinese	Negative Coping		self-blame	0	0	0	0.434	0.566	-0.5574	8	1	36	1	349	305	16298	0	20	1
964	964	1.22144e+18	2020-01-26	Coronavirus, is it dangerous? Yes .. is it targeting non muslims? Hell no .. #فيروس_كورونا	Al Salmiyah	بدر الظفيري	“A person who never made a mistake never tried anything new.” (Albert Einstein) My instagram account @ilbedry .. Gust MBA '17 .. KU '09 🇰🇼	coronavirus is it dangerous yes is it targeting non muslims hell no	Positive Coping	problem-solving		-0.6	0.9	0.131	0.481	0.388	-0.802	0	0	0	0	1062	294	14739	2	14	0
962	962	1.22182e+18	2020-01-27	Talat Hussain | Corona virus and our response https://t.co/jlAxH36Wmh via @YouTube	Al Adailiya	mudasser naeem	Overseas Pakistani living in Kuwait	talat hussain corona virus and our response via	Positive Coping	seeking social support		0	0	0	0	1	0	0	0	1	0	133	698	6363	2	15	0
961	961	1.22206e+18	2020-01-28	Me: *sneezed* The whole room: CORONA !!!! https://t.co/QOibkySHNR	Al Sharq	Mariam Alomi	physiotherapist | amiri	me sneezed the whole room corona	Positive Coping	mindfullness practices		0.2	0.4	0	0	1	0	4	3	4	0	334	317	31465	2	7	0
960	960	1.22218e+18	2020-01-28	@safiranand Wockhardt antibiotics is one among them...actually its like cornered by usfda if wockhardt ready to sell license to pfizer i think tmrw even there plants might b open...people in indian search for start up ..heloo guyz this is it ..wock antibiotics worth looking ..emrock and 5222	Jleeb Al Shiyoukh	L I J O T H O M A S	🎄🎄🎄🎄🎄🎄🎄🎄🎄	wockhardt antibiotics is one among themactually its like cornered by usfda if wockhardt ready to sell license to pfizer i think tmrw even there plants might b openpeople in indian search for start up heloo guyz this is it wock antibiotics worth looking emrock and	Positive Coping	seeking social support		0.25	0.3	0.138	0.042	0.82	0.5859	0	0	0	0	824	873	4725	3	15	0
959	959	1.22226e+18	2020-01-28	No wonder why coronavirus came from china https://t.co/5cyuleVkh6	Hawalli	shiko	Beauty behind the madness	no wonder why coronavirus came from china	Positive Coping	mindfullness practices		0	0	0	0.268	0.732	-0.296	0	1	0	0	186	236	8559	0	20	0
958	958	1.22263e+18	2020-01-29	God invented our bodies well equipped &amp; can fight off viruses and its called the immune system. So you just sleep well, drink water and keep yourself warm to build your immune system. the corona virus has got nothing on a strong immune system. No face mask needed. #DontFear #nCoV	Hadiya	Jo-Anne	Jedi/Queen of the North/Avenger/VS Angel	god invented our bodies well equipped amp can fight off viruses and its called the immune system so you just sleep well drink water and keep yourself warm to build your immune system the corona virus has got nothing on a strong immune system no face mask needed dontfear ncov	Positive Coping	problem-solving		0.516667	0.666667	0.238	0.12	0.642	0.6483	0	0	0	0	110	269	4816	5	21	0
957	957	1.22295e+18	2020-01-30	Fever 🤒 ..corona 🦠...whats ever we indians welcome it .. https://t.co/fUUIUDVk8z	Hadiya	L I J O T H O M A S	🎄🎄🎄🎄🎄🎄🎄🎄🎄	fever face with thermometer corona microbe whats ever we indians welcome it	Positive Coping	positive reframing		0.8	0.9	0.214	0	0.786	0.4588	0	0	0	0	824	873	4725	3	18	0
956	956	1.22335e+18	2020-01-31	Tell me your attitude towards the Chinese people nowadays and I’ll tell you who you are. Seriously stop the hate. Let’s beat Corona Virus together. #PrayForChina. #WagPraning	Hadiya	Jo-Anne	Jedi/Queen of the North/Avenger/VS Angel	tell me your attitude towards the chinese people nowadays and ill tell you who you are seriously stop the hate lets beat corona virus together prayforchina wagpraning	Positive Coping	positive reframing		-0.40833	0.641667	0	0.311	0.689	-0.8555	0	0	0	0	110	269	4816	5	20	0
263	263	1.2233e+18	2020-01-31	dralshayji understands the statement that Corona is political	Al Mahboula	66135897Ghazi Aldous	‏. {السداسية الماسية} للتاسيس المبكر للغة العربية { سكر&عنب}	dralshayji understands statement corona political	Positive Coping	mindfullness practices		0	0.1	0	0	1	0	0	0	0	0	108	782	6786	0	17	0
955	955	1.22347e+18	2020-02-01	@AlexFreeSpeech1 I don't mean to b rude, but is this Corona virus a biological weapon developed by the Pentagon?	Al Jahra	𝕂𝔽ℂ 𝕄𝕔𝔻𝕠𝕟𝕒𝕝𝕕 𝕁. 𝕋𝕣𝕦𝕞𝕡𝕠𝕠	𝓘 𝓭𝓸𝓷'𝓽 𝓰𝓲𝓿𝓮 𝓪 𝓯𝓾𝓬𝓴👽	i dont mean to b rude but is this corona virus a biological weapon developed by the pentagon	Negative Coping		denial	-0.17083	0.529167	0	0.231	0.769	-0.5859	0	1	0	0	26	84	888	0	5	1
954	954	1.22349e+18	2020-02-01	Planning to go to Japan this August, hope they fight off Corona virus.. 🙏🏻	Salwa	GET VACCINATED - لطيفه الفضاله		planning to go to japan this august hope they fight off corona virus folded hands	Positive Coping	positive reframing		0.4	0.7	0.135	0.121	0.744	0.0772	0	1	0	0	208	401	29538	0	6	0
953	953	1.22359e+18	2020-02-01	Did the driver of the bus not have concerns when the guy in the hazchem suit got on board? #coronavirus #coronavirusuk https://t.co/00zc5JnaHz	Fnaitees	Abdurahiim 🏴󠁧󠁢󠁷󠁬󠁳󠁿	الَّذِينَ آمَنُوا وَتَطْمَئِنُّ قُلُوبُهُم بِذِكْرِ اللَّهِ أَلَا بِذِكْرِ اللَّهِ تَطْمَئِنُّ الْقُلُوبُ	did the driver of the bus not have concerns when the guy in the hazchem suit got on board coronavirus coronavirusuk	Positive Coping	mindfullness practices		0	0	0	0	1	0	0	0	2	0	252	638	3148	1	12	0
952	952	1.22359e+18	2020-02-01	China stop eating everything that moves 🙃 #كورونا_الصين	Kuwait	ناصر عبدالعزيز الرشود	Civil Engineer. CSUN alumni. اللهم ارحم من هم تحت الثرى#عبدالعزيزالعثمان#ايمان_الشطي	china stop eating everything that moves upsidedown face	Positive Coping	mindfullness practices		0	0	0	0.239	0.761	-0.296	0	0	4	0	213	212	809	0	12	0
951	951	1.22362e+18	2020-02-01	Corona virus probably wont last for long, because its MADE IN CHINA	Hawalli	Fص يL	🇵🇸	corona virus probably wont last for long because its made in china	Positive Coping	mindfullness practices		-0.025	0.233333	0	0	1	0	0	1	2	0	736	207	13140	1	14	0
950	950	1.22473e+18	2020-02-04	keep calm and change lifestyle #chaina #Chinese #الكويت #كويت #ديرتي #وطن_النهار #الكويت_تغرق #بس_مصخت #طرشوله #الفساد #الاخلاق #فلسفه #الصندوق_الأسود #الاغلبية_الوطنية #الاغلبيه_الصامته #عبدالله_النفيسي #فيروس_كورونا_الصين #الصين #الصين_كورونا https://t.co/eumwMeHQ6p	Abdullah Al Mubarak - West Jleeb	𝙼𝚎𝚜𝚑𝚊𝚛𝚒 𝙰𝙻𝚂𝚊𝚋𝚎𝚊	𝙸𝚏 𝚈𝚘𝚞'𝚛𝚎 𝙾𝚗𝚎 𝙾𝚏 𝚄𝚜 𝙲𝚘𝚖𝚎 𝚊𝚗𝚍 𝙵𝚒𝚗𝚍 𝚄𝚜 !!	keep calm and change lifestyle chaina chinese	Positive Coping	problem-solving		0.15	0.375	0.277	0	0.723	0.3182	0	0	4	0	18	180	326	0	16	0
949	949	1.22692e+18	2020-02-10	@ApexNoely Expensive high quality face mask (you travel a lot)😉	Mishrif	حصه		expensive high quality face mask you travel a lot winking face	Positive Coping	problem-solving		-0.17	0.62	0	0	1	0	0	1	0	0	184	135	6490	0	17	0
948	948	1.22735e+18	2020-02-11	First #coronavirus then this crap? #Yaravirus Can someone find me another planet?	Al Adailiya	Heba	Joie de vivre!	first coronavirus then this crap yaravirus can someone find me another planet	Negative Coping		wishful thinking	-0.275	0.566667	0	0.214	0.786	-0.4588	1	0	1	0	406	446	9054	3	21	1
947	947	1.22762e+18	2020-02-12	@Mubarakhospital Excellent initiative that other hospitals in #Kuwait could learn from. @bepositiveno1 @MKH_PR @MKH_Quality @KUWAIT_MOH	Al Fintas	Nawaf Al-Subaie	ICM & Anaesthesia @StGeorgesTrust interested in healthcare, research, computing, photography and a number of random things.	excellent initiative that other hospitals in kuwait could learn from	Positive Coping	positive reframing		0.4375	0.6875	0.291	0	0.709	0.5719	1	0	1	0	447	200	1315	29	15	0
946	946	1.22877e+18	2020-02-15	@cgtnarabic Preauve chains nearce And they will win the battle against the Corona goid unless you all ✌✌✌🇰🇼🇰🇼🤲🤲🤲🤲🌹🌹🌹🌹🌹🌹✌✌✌	Sabah Al Salem	بيت( اليواقيت) العود الجبلة القديمة ١٨٢٠م	‏‏اهل الكويت القديمة وبناتها بالماضى والحاضر (عادت لنا الايام فوق السفينة )	preauve chains nearce and they will win the battle against the corona goid unless you all victory hand victory hand victory hand kuwait kuwait palms up together palms up together palms up together palms up together rose rose rose rose rose rose victory hand victory hand victory hand	Positive Coping	positive reframing		0.628571	0.871429	0.351	0.04	0.61	0.9657	0	0	0	0	1899	5003	3349	3	19	0
945	945	1.22975e+18	2020-02-18	@NDTVProfit @ndtv it's a good thing May take but it is still 18 months to become a vaccine @WHO Has spoken Give complete information together https://t.co/3DZMbtI72Y	Jleeb Al Shiyoukh	Wasiullah khan🇮🇳	I am proud to be an indian 🇮🇳 Muslim good son brother friend 'FArmer 🌿🌾Save Water💧 Yamaha Rxian 100+135 @msdhoni 😊	its a good thing may take but it is still months to become a vaccine has spoken give complete information together	Positive Coping	problem-solving		0.4	0.5	0.089	0	0.911	0.2382	0	0	0	0	674	570	17410	0	12	0
944	944	1.2305e+18	2020-02-20	@Salabdulrazaq Coronavirus epidemic loading	Qortuba	حمد محمد القناعي	Forza Roma! Football, travelling, & food are my greatest companions. We all complain about the things we can change, yet we choose to live with them.	coronavirus epidemic loading	Positive Coping	mindfullness practices		0	0	0	0	1	0	0	1	0	0	516	672	46784	8	14	0
943	943	1.23126e+18	2020-02-22	@1BigWayne1 @Wario64 Looks like Corona Virus has been spreading on Twitter lately. :(	The Avenues	Cage The JRPG Fanatic🇰🇼🎸⚔ Tales Of Xillia NG+	https://t.co/ZGmSGsUvr9…… Favorite genre is #JRPG love meeting people in the GCC! Love playing with my Guitar/Bass.	looks like corona virus has been spreading on twitter lately	Negative Coping		venting of emotions	-0.3	0.6	0.217	0	0.783	0.3612	0	0	2	0	883	203	28638	28	16	1
262	262	1.23152e+18	2020-02-23	Official news Ministry of Health Rumors, please be careful tcojlg bn qv	Al Mahboula	MoHaMeD 😘(AhlAwY) 😉	‏المنصوره شارع البحر وجزيره الورد ذكريات😉 ‏‏‏اهلاووووي😍 برشلوني 💖 ليفربولي دلوقتي عشان محمدصلاح💝 My principle, Always Expect The goodness you will find it	official news ministry health rumors please careful	Positive Coping	problem-solving		-0.1	1	0.281	0	0.719	0.4404	0	0	0	0	919	2391	2963	0	10	0
260	260	1.23188e+18	2020-02-24	Corona, Oh God, the disease, enlist your soldiers, infect it as you wish and dispose of it as you wish. Oh God, remove it from our homes and from Muslim countries, protect us from the evil of the disease, and save us from plague, plague, and calamity with your kindness, O Kind, you are a powerful thing.	Al Mahboula	﮼يعقوب ﮼ذياب ﮼الوقيتان العازمي	رحمك الله يا أبو أحمد	corona oh god disease enlist soldiers infect wish dispose wish oh god remove homes muslim countries protect us evil disease save us plague plague calamity kindness kind powerful thing	Positive Coping	mindfullness practices		-0.03333	0.966667	0.324	0.058	0.618	0.9531	1	0	0	0	4202	322	34700	2	9	0
261	261	1.23188e+18	2020-02-24	Corona Kuwait Those who refuse the quarantine should be withdrawn from their citizenship and sent back to Iran because their behavior is strange, as if they were intentionally spreading the virus in Kuwait. Become a kamikaze person and become a person who hates 🏻‍♀️ Sit in the hotel as if you are going on a tourist trip so that they can be reassured that you are healthy. Next, go with what does n…	Al Mahboula	☯ƘΩ̴̩BOợ̇OƧ̷h̲Ω̴̩☯	فيني شموخ البدو مع عزة مطير .. يعني خليط من الفخر والفخامه ♊ وزارة العدل	corona kuwait refuse quarantine withdrawn citizenship sent back iran behavior strange intentionally spreading virus kuwait become kamikaze person become person hates sit hotel going tourist trip reassured healthy next go protect you protect others	Negative Coping		denial	0.1125	0.1625	0.057	0.119	0.824	-0.5951	0	0	0	0	253	494	7095	0	9	1
259	259	1.23188e+18	2020-02-24	hlawyer means a virus that destroys any economy in the world, its spread causes death to many, and you, Your Honor, have a shred of responsibility for your country that wants to treat you, believe it, it will benefit them. Losing a point Losing a point tco is hn znw	Al Mahboula	البدرى المقدم الهواري	شيخ العرب هوارة علمتنا معنى الإنتماء علمتنا الكرم والكرامة والكبرياء علمتنا معنى الرجولة ومعنى الصداقة والوفاء	hlawyer means virus destroys economy world spread causes death many you honor shred responsibility country wants treat you believe it benefit them losing point losing point	Positive Coping	mindfullness practices		0.35	0.3	0.138	0.197	0.666	-0.5859	0	0	0	0	632	132	12043	0	10	0
933	933	1.23206e+18	2020-02-24	Corona? Pffffftttt! I grew up eating KFC in my bathroom so my parents/partners didn't knock my diet. I feel bad for no immunity peeps.	Al Adailiya	Mohammed Al-Hottie	Dynamite with a laser beam	corona pft i grew up eating kfc in my bathroom so my parentspartners didnt knock my diet i feel bad for no immunity peeps	Negative Coping		venting of emotions	-0.7	0.666667	0	0.206	0.794	-0.6908	0	0	0	0	273	621	18570	4	21	1
258	258	1.23193e+18	2020-02-24	May God fight the political Corona and may God protect Kuwait, human and stone	Al Mahboula	66135897Ghazi Aldous	‏. {السداسية الماسية} للتاسيس المبكر للغة العربية { سكر&عنب}	may god fight political corona may god protect kuwait human s	Negative Coping		denial	0	0.1	0.351	0.134	0.515	0.4939	0	0	0	0	108	782	6786	0	13	1
935	935	1.23194e+18	2020-02-24	Nd tHis (N worD) @Azi93Alsaleh Big A coUldn’t AnSwer mY pHone Calls. I tHink he goT tHat coroNa VirUs In His bitcH 🦠😂😂	Everywhere	#ON_TRVP_WE_TRUST	#TRVPHOUZE #TRVPBOYZ	nd this n word big a couldnt answer my phone calls i think he got that corona virus in his bitch microbe face with tears of joy face with tears of joy	Positive Coping	mindfullness practices		0.533333	0.166667	0.18	0.18	0.64	0.25	0	1	0	0	183	18	506	0	13	0
936	936	1.23193e+18	2020-02-24	This speech by Donald Trump.. Take off his mask.. andar se pakka Amit Shah niklenge. #TrumpInIndia	Hawalli	Uday Amineni	Die with memories Not Dreams ✈️ || CBN || NTR || NBK || Puri || O -ve ||#Gadjetgeek #YellowArmy #MovieLover #Bagpacker	this speech by donald trump take off his mask andar se pakka amit shah niklenge trumpinindia	Positive Coping	mindfullness practices		0	0	0	0	1	0	0	0	0	0	455	1035	1265	2	13	0
937	937	1.23191e+18	2020-02-24	MOOD : #كورونا #فيروس_كورونا https://t.co/xszsbSCWHA	Al Rawda	𝙼.𝙰𝙻𝙷𝙰𝙼𝙼𝙰𝙳	𝐸𝑚𝑝𝑙𝑜𝑦𝑒𝑒 𝑖𝑛 𝑀𝑂𝐼 🏢 | 𝐴𝑂𝑈 𝑠𝑡𝑢𝑑𝑒𝑛𝑡 📚 | 𝐿𝑉𝐼 . . . ♔	mood	Positive Coping	mindfullness practices		0	0	0	0	1	0	0	0	1	0	99	202	6850	0	12	0
938	938	1.23189e+18	2020-02-24	@Q8eyeDoctor @ALAKBArKWWT No, not necessary if there was proper PPE use and sanitization (my opinion, not looked into research yet). Again I am assuming competency and proper planning for this unfolding situation.	Sabah Al Nasser	Faisal Alshlahi	General Surgery Resident @McMasterSurgery | @UofGlasgow Alumnus | Interests- General & Thoracic Surgery #MedEd #HealthPolicy #Leadership |🏴󠁧󠁢󠁳󠁣󠁴󠁿🇰🇼🇨🇦	no not necessary if there was proper ppe use and sanitization my opinion not looked into research yet again i am assuming competency and proper planning for this unfolding situation	Positive Coping	problem-solving		0	0.4	0	0.071	0.929	-0.296	0	1	0	0	1368	1420	2225	8	10	0
939	939	1.23187e+18	2020-02-24	Corona isn’t scary, lack of adherence to protocol in Kuwait is what’s scary! 😶	Al Sharq	حوراء حسن المتروك	ҫнакиоом 🧜🏻‍♀️ قل الحكي أحيان ... من كثر الإحساس	corona isnt scary lack of adherence to protocol in kuwait is whats scary face without mouth	Negative Coping		venting of emotions	-0.5	1	0.221	0.154	0.625	0.1002	33	1	59	0	1709	1273	37359	8	8	1
940	940	1.23186e+18	2020-02-24	Amir Khan shares a heartfelt message for coronavirus infected people in china🙏💔 #AamirKhan #Bollywood #coronavirus #Corona #ChinaCoronaVirus #messages https://t.co/HnDnxlY5WF	Al Shuwaikh Health	Rawiah Ismael	Graduated from Rajiv Gandhi univ India, jaihind [I hate politics I respect all religions ] #Ayurveda #innovation #Bollywood #SRKian #kindness #Realmadrid #Me💌	amir khan shares a heartfelt message for coronavirus infected people in china folded hands broken heart aamirkhan bollywood coronavirus corona chinacoronavirus messages	Positive Coping	mindfullness practices		-0.2	0.7	0.298	0.19	0.512	0.5574	0	0	0	0	1021	3355	15517	35	8	0
941	941	1.23186e+18	2020-02-24	Corona is coming https://t.co/IBmn5ScxMj	Al Sharq	أ/يوسف	Gratudated KUNIV ARTS , English linguistics and literature , English primary stage teacher	corona is coming	Negative Coping		venting of emotions	0	0	0	0	1	0	0	0	0	0	785	756	46270	2	8	1
942	942	1.23184e+18	2020-02-24	The pharmaceutical company that created #coronavirus I think you made your point.. its time to sell the antidote	Al Surra	يوسف جاسم رمضان	I eat, sleep, and tell stories ..	the pharmaceutical company that created coronavirus i think you made your point its time to sell the antidote	Negative Coping		denial	0	0	0.105	0	0.895	0.25	3	0	1	0	57770	2536	136829	46	7	1
934	934	1.23197e+18	2020-02-24	Corona hit us...	Al Rumaithiya	faa	blessed	corona hit us	Negative Coping		venting of emotions	0	0	0	0	1	0	0	0	0	0	64	60	1093	0	15	1
922	922	1.23235e+18	2020-02-25	Coronavirus health protective measurements in Kuwait became so serious. We have been ordered to cancel Comfest 2020 this weekend and postpone it until further notice. It is sad but public health is a serious matter. We apologize for any inconvenience that we have caused (1)	Al Salmiyah	Maan (マーン) 🇰🇼	‏‏‏‏‏ ‏‏معن خالد محمد خالد الفرج ‎‎‎Comfest Kuwait ‎	coronavirus health protective measurements in kuwait became so serious we have been ordered to cancel comfest this weekend and postpone it until further notice it is sad but public health is a serious matter we apologize for any inconvenience that we have caused	Positive Coping	positive reframing		-0.23333	0.58	0.056	0.227	0.717	-0.7446	34	1	94	10	238	108	3632	0	17	0
924	924	1.23227e+18	2020-02-25	Overview of the key actions required to keep safe and healthy in the workplace for healthcare facility management and healthcare workers. #coronavirus #CoronavirusOutbreak #corona #kuwait #hospital #UAE… https://t.co/CFcPlokRAC	Al Jabriyah	Dr. Hussein Faour	Consultant General #Surgery (#digestive, #endocrine, #oncology, #bariatric) ▪A. #Head of #Surgery Department ▪#Patient #Safety Officer ▪@royale_hayat hospital	overview of the key actions required to keep safe and healthy in the workplace for healthcare facility management and healthcare workers coronavirus coronavirusoutbreak corona kuwait hospital uae	Positive Coping	engaging in relaxation techniques		0.333333	0.666667	0.183	0	0.817	0.6808	0	0	0	0	1372	828	3874	29	11	0
925	925	1.23227e+18	2020-02-25	Be careful everyone take all the precautions needed to be safe use face masks and sanitizer. Make sure to avoid large crowds. #kuwait #كورونا_الجديد	Mubarak Al Kabeer	NORA	What Ever Happens, Don't Let Go Of My Hand.	be careful everyone take all the precautions needed to be safe use face masks and sanitizer make sure to avoid large crowds kuwait	Positive Coping	engaging in relaxation techniques		0.278571	0.704365	0.243	0.079	0.679	0.5574	0	0	0	0	401	199	35973	7	11	0
926	926	1.23225e+18	2020-02-25	Be alert not anxious #Covid_19	Salwa	GET VACCINATED - لطيفه الفضاله		be alert not anxious covid	Positive Coping	positive reframing		0.125	1	0.568	0	0.432	0.4479	0	0	0	0	208	401	29538	0	10	0
927	927	1.2322e+18	2020-02-25	Wishing everyone in #Kuwait a Happy National Day! In spite of the cancellation of all public events due to caution about corona virus, we celebrate 59 yrs of independence and tomorrow is 29 yrs since liberation from the 1990 invasion. I’m very #grateful https://t.co/698ju33XQi	Al Yarmouk	Ilene Winokur AlZaid|#Journeys2Belonging	Author|#Journey2Belonging|Wakelet Ambassador|TESOL Author|Blogger|Podcaster|PD Specialist| https://t.co/QyNMJD9S17	wishing everyone in kuwait a happy national day in spite of the cancellation of all public events due to caution about corona virus we celebrate yrs of independence and tomorrow is yrs since liberation from the invasion im very grateful	Positive Coping	mindfullness practices		0.21875	0.435417	0.247	0.067	0.686	0.8479	2	1	9	0	4246	2882	32285	119	7	0
928	928	1.23213e+18	2020-02-25	Some Kuwaiti people do not adhere to protocol. They do not want to be quarantined. They’re fighting the system. If everyone adheres to protocol and quarantine, Enshallah we will be able to contain this and get through this together.	Al Shuhada	حوراء حسن المتروك	ҫнакиоом 🧜🏻‍♀️ قل الحكي أحيان ... من كثر الإحساس	some kuwaiti people do not adhere to protocol they do not want to be quarantined theyre fighting the system if everyone adheres to protocol and quarantine enshallah we will be able to contain this and get through this together	Positive Coping	problem-solving		0.5	0.625	0	0.091	0.909	-0.4063	0	1	2	0	1709	1273	37359	8	2	0
923	923	1.2323e+18	2020-02-25	🦠🦠🦠🦠🦠 #corona #coronavírus #kuwait #kuwaitairways #travel #travelphotography #travelblog #travelblogger #qatar #الكويت #كورونا #q8instagram #q8photo #selfie #selfportrait #selfportraitphotography @ Kuwait… https://t.co/DnYpspzitM	Airport Area	﮼عمارالعباد	Pharmacist and in love with art	microbe microbe microbe microbe microbe corona coronavrus kuwait kuwaitairways travel travelphotography travelblog travelblogger qatar qinstagram qphoto selfie selfportrait selfportraitphotography kuwait travel	Positive Coping	engaging in relaxation techniques		0	0	0	0	1	0	0	0	0	0	1223	1404	16423	28	13	0
921	921	1.23237e+18	2020-02-25	Is it orchestrated epidemic? #CoronavirusOutbreak	Al Julayah - Al Zour - Sulah - Al Dubaiy	عمر الناصر الفيلكاوي	عقاري مهني متخصص بالعقار الكويتي PgDip in Real Estate Management & Development from Heriot Watt University صاحب شركة إيزي هومز العقارية @easy_homez	is it orchestrated epidemic coronavirusoutbreak	Positive Coping	mindfullness practices		0	0	0	0	1	0	1	0	0	1	1360	4350	6058	6	18	0
920	920	1.23245e+18	2020-02-25	The Coronavirus is very much under control in the USA. We are in contact with everyone and all relevant countries. CDC &amp; World Health have been working hard and very smart. Stock Market starting to look very good to me!	Jleeb Al Shiyoukh	Jafar Hossain	O Allah, grant me the guidance to follow the path of Islam... 😊 My life is my mother ( I Miss you my family 👪 I m Indian 🇮🇳 ( I love my country India)	the coronavirus is very much under control in the usa we are in contact with everyone and all relevant countries cdc amp world health have been working hard and very smart stock market starting to look very good to me	Positive Coping	positive reframing		0.259484	0.569563	0.139	0.031	0.83	0.699	1	0	0	0	44	1889	167	0	23	0
932	932	1.23211e+18	2020-02-25	Corona virus epidemic really reminded me of this game 😂😂 #plagueinc https://t.co/jABTdeogfS	Al Qusour	Abdullah Buftain	Abdullah buftain .. may-27 ... اللهم شافي والدي و البسه ثوب الصحه و العافيه .... الوسط الديمقراطي 💛	corona virus epidemic really reminded me of this game face with tears of joy face with tears of joy plagueinc	Positive Coping	mindfullness practices		0.35	0.25	0.277	0.139	0.584	0.7003	0	1	4	0	355	634	2111	1	1	0
931	931	1.23213e+18	2020-02-25	Why are Iran corona numbers becoming scary numbers? How come it’s just Iran? Does it have anything to do with religion? I believe facts and numbers, so let’s try to analyse the data we have so far...	Al Shuhada	حوراء حسن المتروك	ҫнакиоом 🧜🏻‍♀️ قل الحكي أحيان ... من كثر الإحساس	why are iran corona numbers becoming scary numbers how come its just iran does it have anything to do with religion i believe facts and numbers so lets try to analyse the data we have so far	Positive Coping	problem-solving		0.016667	0.95	0	0.082	0.918	-0.4939	3	2	1	0	1709	1273	37359	8	2	0
930	930	1.23213e+18	2020-02-25	As I said previously, corona itself isn’t scary, corona is a simple flu to you and I. Most people that might get it, will get a normal flu that is manageable with paracetamol, fluids and rest.	Al Shuhada	حوراء حسن المتروك	ҫнакиоом 🧜🏻‍♀️ قل الحكي أحيان ... من كثر الإحساس	as i said previously corona itself isnt scary corona is a simple flu to you and i most people that might get it will get a normal flu that is manageable with paracetamol fluids and rest	Positive Coping	positive reframing		-0.00333	0.534762	0.064	0.127	0.808	-0.3761	1	1	1	1	1709	1273	37359	8	2	0
929	929	1.23213e+18	2020-02-25	Why is it different in Kuwait? Corona has reached multiple countries and has been contained in certain countries effectively, why is it so different in Kuwait?	Al Shuhada	حوراء حسن المتروك	ҫнакиоом 🧜🏻‍♀️ قل الحكي أحيان ... من كثر الإحساس	why is it different in kuwait corona has reached multiple countries and has been contained in certain countries effectively why is it so different in kuwait	Negative Coping		denial	0.162857	0.514286	0.218	0	0.782	0.6597	0	1	2	0	1709	1273	37359	8	2	1
913	913	1.23278e+18	2020-02-26	In my opinion what’s worse than coronavirus...are all those mentally ill people judgmental, hypocrites , ungrateful and so on. In our society because they don’t have a cure and their numbers keep growing.	Mishrif	Munira R Borisly	IN A WORLD OF MY OWN 🖤	in my opinion whats worse than coronavirusare all those mentally ill people judgmental hypocrites ungrateful and so on in our society because they dont have a cure and their numbers keep growing	Negative Coping		venting of emotions	-0.45	0.8	0.044	0.231	0.725	-0.802	0	0	0	0	226	357	6981	2	21	1
914	914	1.23277e+18	2020-02-26	A gateaway in an island with limited people, gated community , no visitors, commodities delivered to a sanitized room , and good company of friends and family for six months .. #Coronavirus	Al Surra	يوسف جاسم رمضان	I eat, sleep, and tell stories ..	a gateaway in an island with limited people gated community no visitors commodities delivered to a sanitized room and good company of friends and family for six months coronavirus	Negative Coping		wishful thinking	0.314286	0.371429	0.171	0.117	0.712	0.4404	0	0	0	0	57770	2536	136829	46	20	1
915	915	1.23266e+18	2020-02-26	@NAS_Nourah Go to Paris because they’re the only country who have Therapy and cure the people from corona	Al Rumaithiya	عبدالله مبارك عبدالرضا	( insta/bo_mubarak89 ) bachelors degree in physical education and sports and yes I’m not A P.E teacher 🎾🏓🏸⚽️🏀🥊🎾🤾🏼‍♂️⛹🏻‍♂️🤺🤾🏼‍♀️🏋🏼	go to paris because theyre the only country who have therapy and cure the people from corona	Negative Coping		denial	0	1	0	0	1	0	0	0	0	0	393	260	9757	0	13	1
253	253	1.23268e+18	2020-02-26	Singaporean politician Gan Kim Jong shares the latest information about the new Corona virus Corona_in_Kuwait tco xeqoyrou	Al Mahboula	𝙼𝚊𝚖𝚍𝚘𝚞𝚑 𝙷. 𝙱𝚎𝚍𝚊𝚒𝚠𝚒 🇸🇦	𝙳𝚘𝚗'𝚝 𝚏𝚘𝚕𝚕𝚘𝚠 𝚖𝚎, 𝙸 𝚍𝚘𝚗'𝚝 𝚔𝚗𝚘𝚠 𝚠𝚑𝚎𝚛𝚎 𝙸'𝚖 𝚐𝚘𝚒𝚗𝚐!! #الوجه 🇸🇦 #الهلال 💙	singaporean politician gan kim jong shares latest information new corona virus corona_in_kuwait	Positive Coping	positive reframing		0.318182	0.677273	0.121	0	0.879	0.296	1	0	0	0	379	1013	2174	4	14	0
917	917	1.2326e+18	2020-02-26	What movies taught me is it never stops at 18 infected and finishes. Its either zero or unstoppable.. #coronavirus #كورونا_في_الكويت	Al Surra	يوسف جاسم رمضان	I eat, sleep, and tell stories ..	what movies taught me is it never stops at infected and finishes its either zero or unstoppable coronavirus	Negative Coping		venting of emotions	0	0	0.195	0.086	0.719	0.312	0	0	3	1	57770	2536	136829	46	9	1
254	254	1.23267e+18	2020-02-26	My beloved Harbi, two weeks before he travels ✈️ Corona_in_Kuwait tcor hfsljjnn	Al Mahboula	أ. فيصل العجمي	سبحان الله !	beloved harbi two weeks travels corona_in_kuwait	Positive Coping	positive reframing		0.7	1	0.231	0	0.769	0.5106	0	0	0	0	276	319	3228	1	14	0
255	255	1.23261e+18	2020-02-26	fawaz_dr Corona is political par excellence	Al Mahboula	66135897Ghazi Aldous	‏. {السداسية الماسية} للتاسيس المبكر للغة العربية { سكر&عنب}	fawaz_dr corona political par excellence	Negative Coping		denial	0	0.1	0.451	0	0.549	0.6249	0	0	0	0	108	782	6786	0	9	1
916	916	1.23265e+18	2020-02-26	- Nothing to worry about, they always wipe the machines down before &amp; after use,, it’s a protocol👏🏻 #كورونا_في_الكويت #Corona #الكويت #Kuwait https://t.co/1N2RvDv0fr	Miss Platinum Health Club	حصه يوسف العليّان	♥ Rashed AlMajed ♥ اللهم ارحم جدي خليفة الشايع وجدتي وضحه الجابر وعمر العمر	nothing to worry about they always wipe the machines down before amp after use its a protocol clapping hands corona kuwait	Positive Coping	positive reframing		0.122222	0.494444	0.095	0	0.905	0.3412	0	0	1	0	395	287	7402	1	13	0
257	257	1.23259e+18	2020-02-26	Panic and fear, whether Corona or something else. God said, “Say, ‘God’s decrees, our Master, will afflict us.’ And in God, let the believers put our trust.”	Al Mahboula	66135897Ghazi Aldous	‏. {السداسية الماسية} للتاسيس المبكر للغة العربية { سكر&عنب}	panic fear whether corona something else god said say ‘god decrees master afflict u god let believers put trust	Positive Coping	mindfullness practices		0	0	0.125	0.193	0.682	-0.5106	0	0	0	0	108	782	6786	0	9	0
256	256	1.23261e+18	2020-02-26	akalghanim kalroudan Public health is a public demand. Asian mosque leaders and a mix of workers may be unable to buy masks. Do we call on charitable organizations to spend money that they collect inside the country to maintain a safe environment?	Al Mahboula	66135897Ghazi Aldous	‏. {السداسية الماسية} للتاسيس المبكر للغة العربية { سكر&عنب}	akalghanim kalroudan public health public demand asian mosque leaders mix workers may unable buy masks call charitable organizations spend money collect inside country maintain safe environment	Positive Coping	problem-solving		0.1	0.322222	0.121	0.033	0.846	0.6249	0	1	0	0	108	782	6786	0	9	0
919	919	1.23259e+18	2020-02-26	True #كورونا_في_الكويت #كورونا #الكويت #فيروس_كورونا https://t.co/Xff1ijUfZR	Jaber Al Ahmad City	salem hamdan الشمري	Salem31♊️Muslim Half Kuwaiti🇰🇼Half Saudi🇸🇦I respect everyone🌍My specialization in computer programming💻	true iran spreads corona virus on Kuwait	Positive Coping	mindfullness practices		0.35	0.65	1	0	0	0.4215	0	0	1	0	266	148	5598	2	9	0
918	918	1.23259e+18	2020-02-26	Meen befaye2on hol enu it’s become an epidemic because of their inconsiderate actions? https://t.co/d1xYVdH2lJ	Al Salmiyah	bee	a teacher, a recruiter with a passion for football. i suck at bios.	meen befayeon hol enu its become an epidemic because of their inconsiderate actions	Negative Coping		denial	0	0	0	0.195	0.805	-0.4404	0	0	1	0	840	427	20949	1	9	1
909	909	1.23299e+18	2020-02-27	#socialmedia bad impact is spreading wrong news that might at many times cause fear &amp; #frustration therefore always make sure to check the source of #information @Bananamediaco #الكويت_كورونا #CoronaVirusUpdates #media #Marketing #bananamedia #design #GraphicDesign #people https://t.co/rTV3DDANTV	Kuwait City	Banana Media Co.	#Design, #branding, #media, #production, #events & more. #bananamediaco "We take it so you don’t go Bananas!"	socialmedia bad impact is spreading wrong news that might at many times cause fear amp frustration therefore always make sure to check the source of information coronavirusupdates media	Positive Coping	problem-solving		-0.05	0.738889	0.053	0.299	0.648	-0.891	0	1	5	0	664	16	965	0	11	0
903	903	1.23314e+18	2020-02-27	Enough with the corona talk 😭	Al Jabriyah	Zu ☁️	Nubivagant	enough with the corona talk loudly crying face	Negative Coping		avoidance	-0.1	0.55	0	0.307	0.693	-0.4767	1	0	0	1	202	290	1969	0	21	1
912	912	1.23287e+18	2020-02-27	Anne and I were gonna go to Dubai for my birthday weekend next month. Have decided not to travel due to uncertainties about #Covid_19 and being able to reenter Kuwait.	Al Salmiyah	Lloyd Parker	Retired #EMS Chief #Paramedic, Husband, Father of 2 Amazing Young Women, Very amateur golfer.	anne and i were gonna go to dubai for my birthday weekend next month have decided not to travel due to uncertainties about covid and being able to reenter kuwait	Positive Coping	problem-solving		0.125	0.333333	0	0.076	0.924	-0.34	0	0	0	0	1370	4723	6850	29	3	0
908	908	1.23302e+18	2020-02-27	The amount of times I heard the word “corona” is just unbelievable	Al Dasma	Bee is good	nothing makes sense 🧷	the amount of times i heard the word corona is just unbelievable	Negative Coping		venting of emotions	-0.25	1	0.141	0	0.859	0.2023	0	1	2	0	474	383	19398	3	13	1
907	907	1.23303e+18	2020-02-27	Wrong day to wear glasses; they keep fogging up with my double mask situation 🤓	Al Sharq	حوراء حسن المتروك	ҫнакиоом 🧜🏻‍♀️ قل الحكي أحيان ... من كثر الإحساس	wrong day to wear glasses they keep fogging up with my double mask situation nerd face	Positive Coping	problem-solving		-0.25	0.45	0	0.275	0.725	-0.6486	0	1	0	0	1709	1273	37359	8	14	0
906	906	1.23303e+18	2020-02-27	Fighting corona front line and centre 😷 🤓	Al Sharq	حوراء حسن المتروك	ҫнакиоом 🧜🏻‍♀️ قل الحكي أحيان ... من كثر الإحساس	fighting corona front line and centre face with medical mask nerd face	Positive Coping	positive reframing		0	0	0	0.32	0.68	-0.5719	0	0	1	0	1709	1273	37359	8	14	0
905	905	1.23309e+18	2020-02-27	Corona virus has been signaled in Kuwait https://t.co/UVnkmQhjRS	Al Farwaniya	ᗰᗪ ᗩ𝓁ℴ𝓂ℊ𝒾𝓇 н𝗈𝗌𝗌𝖾𝗇 ᗷ𝘢𝘱𝘱𝘺🇧🇩🥀	ꕥ༆ꕥ꧂༒꧂ꕥ༆ꕥꕥ༆ꕥ꧂༒꧂ꕥ༆༆ ٠\l━━━━━━━━━━━━━ ◥◣◢✇◣╭◎╮◢✇◣◢◤ ◎▤▇∵◢▇▤🅱🅰🅿🅿🆈▤◈▤◎ ◢◤◥✇◤╰◎╯◥✇◤◥◣ ꕥ༆ꕥ꧂༒꧂ꕥ༆ꕥꕥ༆ꕥ꧂༒꧂ꕥ༆༆⚘ 🇧🇩I love Bangladesh🇧🇩 🇰🇼live location Kuwait🇰🇼	corona virus has been signaled in kuwait	Negative Coping		venting of emotions	0	0	0	0	1	0	0	0	9	0	2279	788	1442	0	17	1
904	904	1.23311e+18	2020-02-27	Wow ... empty disinfection container at Kuwait airport - and the only one I have seen across the airport - and on a day where everyone is edgy and waring masks covering a fearful face 😡 @ Kuwait International Airport https://t.co/eVeNsu21AL	Airport Area	Otto K	Traveling Hotelier with wife, son, Emma the BMW Boxer and 30 years, 12 countries under my expanding belt ... and enjoying it 😝	wow empty disinfection container at kuwait airport and the only one i have seen across the airport and on a day where everyone is edgy and waring masks covering a fearful face enraged face kuwait international airport	Negative Coping		venting of emotions	-0.2	0.708333	0.085	0.173	0.742	-0.4404	0	0	0	0	159	327	653	1	19	1
910	910	1.23299e+18	2020-02-27	@RichardEngel Here in Kuwait the coronavirus threat is being taken extremely seriously. National &amp; Liberation Day celebrations were canceled. Schools &amp; universities closed until March 15. Ambitious public awareness campaign.	Al Mahboula	John Hicks	Retired Detroit banker/boomer proud to be blocked by Sebastian Gorka, looney lawyer Sidney Powell, & by AmyMek Islamaphobic bigot.	here in kuwait the coronavirus threat is being taken extremely seriously national amp liberation day celebrations were canceled schools amp universities closed until march ambitious public awareness campaign	Positive Coping	positive reframing		-0.04583	0.395833	0.093	0.161	0.746	-0.3167	0	0	10	0	50	43	10573	1	11	0
911	911	1.23291e+18	2020-02-27	While the whole world is worrying about the corona virus, Muslims in India have to worry about other human beings who are out for their lives. What has happened to humanity? Where is the justice?	Al Qibla	عبير خان	Twitter is my personal diary	while the whole world is worrying about the corona virus muslims in india have to worry about other human beings who are out for their lives what has happened to humanity where is the justice	Negative Coping		venting of emotions	0.025	0.291667	0.084	0.13	0.786	-0.2263	2	1	13	0	246	238	1397	0	5	1
252	252	1.23282e+18	2020-02-27	Schedule for next week Saturday Dust Sunday Corona Monday Locusts Tuesday Dinosaurs Wednesday Fire meteor Thursday Earthquake Friday Resurrection Day Joy Joy	Al Mahboula	🚒Hashem🇰🇼	افْعَلُوا الخيرَ ولا تحقِرُوا منهُ شيْئاً !	schedule next week saturday dust sunday corona monday locusts tuesday dinosaurs wednesday fire meteor thursday earthquake friday resurrection day joy joy	Positive Coping	mindfullness practices		0.533333	0.133333	0.262	0.083	0.655	0.7351	2	0	1	0	210	182	9631	1	0	0
251	251	1.23297e+18	2020-02-27	Relying and relying on God, praising and thankful for His blessings, staying away from the Corona environment, hoping that God will not leave homes for the oppressors. He has tasted the taste of happiness and psychological comfort.	Al Mahboula	66135897Ghazi Aldous	‏. {السداسية الماسية} للتاسيس المبكر للغة العربية { سكر&عنب}	relying relying god praising thankful blessings staying away corona environment hoping god leave homes oppressors tasted taste happiness psychological comfort	Positive Coping	mindfullness practices		0.35	0.15	0.471	0	0.529	0.9718	0	0	0	0	108	782	6786	0	10	0
250	250	1.2331e+18	2020-02-27	There is no power except in God, the Most High, the Great. I mean, it could be a biological war. Corona_new_tcojd tm wfle	Al Mahboula	كامنجا Kamanja	‏‏لا إله إلا أنت سبحانك إني كنت من الظالمين... مصري حر ولا انتمي لأي جهه سياسيه فقط نبحث عن طريق الحق أينما كان	power except god high great mean could biological war corona_new	Negative Coping		denial	0.286875	0.619375	0.205	0.193	0.602	0.0935	1	0	1	0	527	1427	4432	0	18	1
902	902	1.23326e+18	2020-02-28	#الكويت_كورونا Don’t be panic for pandemic Be prepared ✔	Sabah Al Salem	الدكتور أحمد بن محمد نيازي 🧢	💙دكتور طبيب أسنان في إداره تعزيز الصحه وزاره الصحه دوله الكويت 🇰🇼محاضر في معهد التمريض بالمعاهد التطبيقية ♥️ عَلَى ٱللَّهِ تَوَكَّلْنَا☪️ يُدَبِّرُ الْأَمْرَ	dont be panic for pandemic be prepared check mark	Positive Coping	positive reframing		0	0	0.397	0	0.603	0.5577	0	0	0	0	1013	4941	16474	1	5	0
898	898	1.23341e+18	2020-02-28	Tell// are you coronavirus ? Cuz damn you’re unstoppable	Al Qusour	آيات	i’m addicted to kissing my cats	tell are you coronavirus cuz damn youre unstoppable	Positive Coping	mindfullness practices		0	0	0	0.429	0.571	-0.5423	0	1	1	0	125	194	1375	0	15	0
897	897	1.23343e+18	2020-02-28	Please stay safe until this all blows over, let’s try adapting the WHO corona virus advice for Kuwait 🦠🇰🇼 😷	Al Shuhada	حوراء حسن المتروك	ҫнакиоом 🧜🏻‍♀️ قل الحكي أحيان ... من كثر الإحساس	please stay safe until this all blows over lets try adapting the who corona virus advice for kuwait microbe kuwait face with medical mask	Positive Coping	problem-solving		0.25	0.25	0.191	0	0.809	0.6369	1	1	4	0	1709	1273	37359	8	16	0
896	896	1.23343e+18	2020-02-28	2. Wear a mask if you work in hospitals or are dealing with sick individuals, anyone that’s coughing or complaining of flu like symptoms. 😷	Al Shuhada	حوراء حسن المتروك	ҫнакиоом 🧜🏻‍♀️ قل الحكي أحيان ... من كثر الإحساس	wear a mask if you work in hospitals or are dealing with sick individuals anyone thats coughing or complaining of flu like symptoms face with medical mask	Positive Coping	engaging in relaxation techniques		-0.35714	0.428571	0.075	0.232	0.693	-0.6369	1	1	0	0	1709	1273	37359	8	16	0
895	895	1.23343e+18	2020-02-28	4. Let’s try to avoid unnecessary travel if possible. If you really need to travel please wear masks. ✈️ 😷	Al Shuhada	حوراء حسن المتروك	ҫнакиоом 🧜🏻‍♀️ قل الحكي أحيان ... من كثر الإحساس	lets try to avoid unnecessary travel if possible if you really need to travel please wear masks airplane face with medical mask	Positive Coping	problem-solving		-0.05	0.525	0.094	0.09	0.816	0.0258	1	1	0	0	1709	1273	37359	8	16	0
894	894	1.23343e+18	2020-02-28	5. If you have been exposed to anyone from the high risk countries and are starting to feel unwell; in the form of fever, dry cough or flu like symptoms please wear a mask and visit your nearest polyclinic. 🌡	Al Shuhada	حوراء حسن المتروك	ҫнакиоом 🧜🏻‍♀️ قل الحكي أحيان ... من كثر الإحساس	if you have been exposed to anyone from the high risk countries and are starting to feel unwell in the form of fever dry cough or flu like symptoms please wear a mask and visit your nearest polyclinic thermometer	Positive Coping	problem-solving		0.031111	0.413333	0.107	0.134	0.759	-0.0516	1	1	0	0	1709	1273	37359	8	16	0
893	893	1.23343e+18	2020-02-28	6. If you start developing shortness of breath or difficulty breathing, please visit your nearest hospital. Don’t waste time not getting any medical attention because you’re scared of corona virus exposure in hospitals. All MOH hospitals are taking precautionary measures. 🩺 🏥	Al Shuhada	حوراء حسن المتروك	ҫнакиоом 🧜🏻‍♀️ قل الحكي أحيان ... من كثر الإحساس	if you start developing shortness of breath or difficulty breathing please visit your nearest hospital dont waste time not getting any medical attention because youre scared of corona virus exposure in hospitals all moh hospitals are taking precautionary measures stethoscope hospital	Positive Coping	problem-solving		-0.1	0	0.099	0.113	0.788	-0.17	1	1	0	0	1709	1273	37359	8	16	0
891	891	1.23346e+18	2020-02-28	@bepositiveno1 Today an email went out to all employees to exempt them from finger print as precautions taking for the current spread of corona virus, they were requested to use the access card as a proof of attendance I do not carry a pen or a wallet with me since a year back 😉	Zahra	Dr. Saleh		today an email went out to all employees to exempt them from finger print as precautions taking for the current spread of corona virus they were requested to use the access card as a proof of attendance i do not carry a pen or a wallet with me since a year back winking face	Positive Coping	positive reframing		0	0.2	0.026	0	0.974	0.1027	0	1	1	0	2395	1766	50359	1	18	0
899	899	1.23338e+18	2020-02-28	Yes my hand sanitizer is hanging out from my hoop earring 🤪😂	Airport Area	rawan...	“Que sera, sera” 🌬🍃 || pharmacist ☤ || I like to distract myself with memes, cats and naps...	yes my hand sanitizer is hanging out from my hoop earring zany face face with tears of joy	Positive Coping	mindfullness practices		0.8	0.2	0.379	0.074	0.547	0.8316	0	0	0	0	116	363	2701	0	13	0
901	901	1.23334e+18	2020-02-28	Corona related Data science research? 🤔	Hitteen	AحMAD	Data scientist. still learning For beneficial content regarding Data Check the liked tweets!	corona related data science research thinking face	Positive Coping	positive reframing		0	0.4	0	0	1	0	0	1	0	0	536	436	27464	5	10	0
248	248	1.23342e+18	2020-02-28	The world has the right to come together and rise up to stand against a global epidemic. Will Muslims stand up and stand together to spread their religion, cleanse their interiors, correct their faith, and establish true monotheism?	Al Mahboula	66135897Ghazi Aldous	‏. {السداسية الماسية} للتاسيس المبكر للغة العربية { سكر&عنب}	world right come together rise stand global epidemic muslims stand stand together spread religion cleanse interiors correct faith establish true monotheism	Negative Coping		self-blame	0.211905	0.395238	0.135	0	0.865	0.6808	0	0	0	0	108	782	6786	0	15	1
249	249	1.23334e+18	2020-02-28	Corona virus treatment Khaled_Corona tcoxeqlsuvi p	Al Mahboula	MoHaMeD 😘(AhlAwY) 😉	‏المنصوره شارع البحر وجزيره الورد ذكريات😉 ‏‏‏اهلاووووي😍 برشلوني 💖 ليفربولي دلوقتي عشان محمدصلاح💝 My principle, Always Expect The goodness you will find it	corona virus treatment khaled_corona	Positive Coping	positive reframing		0	0	0	0	1	0	0	0	1	0	919	2391	2963	0	10	0
892	892	1.23344e+18	2020-02-28	Facing #coronavirus with style :p https://t.co/KjZdQ7BGgM	Al Wusta	ＢＡＤＥＲ▵🤼‍♂️🇰🇼🇧🇷	ＡＬＬＡＨ,ＦＡＭＩＬＹ👩‍👦‍👦,ＪｉｕＪｉｔｓｕ🤼‍♂️,ＯＦＦ－ＲＯＡＤ 🐪👻yry0r..and i love sushi 🍣 #ForzaJuve #JIMNY ⁽ᶠᴬᵀᴴᴱᴿ ᴼᶠ ᵀᵂᴼ ᴰᴱᴹᴼᴺˢ🤫	facing coronavirus with style silly face	Positive Coping	engaging in relaxation techniques		0	0	0	0	1	0	0	0	0	0	229	151	28038	13	17	0
900	900	1.23335e+18	2020-02-28	Hello from #Day1 home quarantine✋🏼 #coronavirus #13daystogo	Ashbeliah	Fai Al-H🇰🇼	Simply another dreamer but hopefully a one of a kind achiever ☆ Some day a motivational speaker ☆ Positive vibes all the way♡ Physical therapist	hello from day home quarantine raised hand coronavirus daystogo	Positive Coping	engaging in relaxation techniques		0	0	0.225	0	0.775	0.4939	0	1	0	0	381	249	29708	4	11	0
882	882	1.23389e+18	2020-02-29	@y_7idar Hopefully the coronavirus will do its job 😔	Al Qusour	آيات	i’m addicted to kissing my cats	hopefully the coronavirus will do its job pensive face	Negative Coping		wishful thinking	0	0	0.364	0	0.636	0.4588	0	0	0	0	125	194	1375	0	23	1
247	247	1.23382e+18	2020-02-29	In order to ensure your safety and to preserve public health, hand sanitizer has been provided at the entrance to the club. Sterilization and cleaning of devices is a regular basis. Gloves are provided for use for your safety and for the sake of public health hand tcovfdmntwdbo	Al Mahboula	Challenge HealthClub	Our goal is to provide a refreshingly positive workout experience and change the way people view iron gyms.	order ensure safety preserve public health hand sanitizer provided entrance club sterilization cleaning devices regular basis gloves provided use safety sake public health hand	Positive Coping	positive reframing		0	0.070085	0.253	0	0.747	0.9274	0	0	0	0	86	4	448	2	18	0
883	883	1.23387e+18	2020-02-29	Just arrived from Lebanon to Kuwait and got tested at the airport for coronavirus .... I’m corona free 🕊	Airport Area	Alaa Alsayegh🇰🇼🏴󠁧󠁢󠁳󠁣󠁴󠁿🇬🇧	🍀💊Forensic toxicologist, Msc.Forensic Toxicology(@UofGlasgow 2015), Bsc.Pharmacology(@UofLiverpool 2001) 💫	just arrived from lebanon to kuwait and got tested at the airport for coronavirus im corona free dove	Positive Coping	positive reframing		0.4	0.8	0.163	0	0.837	0.5106	0	1	1	0	306	399	6983	8	21	0
889	889	1.2337e+18	2020-02-29	And suddenly.. everybody looks better.. is it the mask?	Mishrif	hussain	alot more than u can handle!! #khafeef	and suddenly everybody looks better is it the mask	Positive Coping	problem-solving		0.25	0.5	0.266	0	0.734	0.4404	0	0	0	0	729	1151	20908	7	10	0
884	884	1.23387e+18	2020-02-29	tell// yesss nobody was wearing a mask 😂	Al Faiha	هيا ح. الشمري	photographer | Aquarius | optimistic | coffee connoisseur | @boonedkwt | @imvelvaere	tell yes nobody was wearing a mask face with tears of joy	Positive Coping	mindfullness practices		0.8	0.2	0.374	0.109	0.517	0.6808	0	0	0	0	192	293	6006	0	21	0
885	885	1.23383e+18	2020-02-29	When is this coronavirus gonna end💔 i wanna have a massage &amp; a pedi/mani at the spa without the thought that i might die	Zahra	جِنـان نَبيـل الخَليفـة	BSc(honor graduate🥇), Teaching👩🏻‍🏫❤️.. Engineering👷🏻‍♀️& Volunteering🌿 | Founder of @ehsankwt #DemocraticCircle #Jerusalem #البدون_أولوية	when is this coronavirus gonna end broken heart i wanna have a massage amp a pedimani at the spa without the thought that i might die	Negative Coping		avoidance	-0.4	0.4	0.123	0.205	0.673	-0.4215	0	0	1	0	1659	1393	26899	1	19	1
886	886	1.23381e+18	2020-02-29	I got my mask 😷 ❗️ This is not for the virus❗️This is for the motorbike 🏍 🤪🤣 @ Kuwait City https://t.co/be5Pj6jppo	Al Qibla	Aynur Mamedova	Director of Marketing	i got my mask face with medical mask red exclamation mark this is not for the virus red exclamation mark this is for the motorbike motorcycle zany face rolling on the floor laughing kuwait city	Positive Coping	engaging in relaxation techniques		0	0	0.086	0	0.914	0.4939	0	0	0	0	3976	132	5112	49	17	0
887	887	1.23377e+18	2020-02-29	Can i go to a place where no one talks about corona💀	Al Dasma	sas✨	young, dumb and broke| livin’ la vida loki	can i go to a place where no one talks about corona skull	Negative Coping		wishful thinking	0	0	0	0.155	0.845	-0.296	1	1	0	0	127	170	2730	0	14	1
890	890	1.23363e+18	2020-02-29	KEEP SAFE AND WEAR A FACE MASK 😷 (@ Starbucks Al Khiran in Khiran, Al Ahmadi) https://t.co/8z8TaxModz https://t.co/K9U3eOPPnd	Sabah Al Ahmad Marine City - Loloat Al Khairan	بوعوّاس	حينما نتأمل ذكرياتنا نجد ان أجمل ما حدث لنا كان صدفة ❥	keep safe and wear a face mask face with medical mask starbucks al khiran in khiran al ahmadi	Positive Coping	problem-solving		0.25	0.25	0.146	0	0.854	0.4404	0	0	0	0	570	375	27885	19	5	0
888	888	1.23372e+18	2020-02-29	@BiIaI_Yahya @Sef1337 Wdym how does it warm you up, stay in your quarantined room the corona is affecting your brain 😂	Al Salmiyah	JM		wdym how does it warm you up stay in your quarantined room the corona is affecting your brain face with tears of joy	Positive Coping	mindfullness practices		0.7	0.4	0.207	0.069	0.725	0.5859	0	2	2	0	999	1000	12677	3	11	0
244	244	1.23406e+18	2020-03-01	Oh God, protect Muslim countries from the epidemic, the calamity, the high prices, the domination of enemies, and the poor performance of governments. Oh God, Corona with the lungs of a murderous criminal.	Al Mahboula	66135897Ghazi Aldous	‏. {السداسية الماسية} للتاسيس المبكر للغة العربية { سكر&عنب}	oh god protect muslim countries epidemic calamity high prices domination enemies poor performance governments oh god corona lungs murderous criminal	Positive Coping	mindfullness practices		-0.21333	0.563333	0.145	0.322	0.533	-0.8519	0	0	0	0	108	782	6786	0	10	0
245	245	1.23406e+18	2020-03-01	Oh God, protect the free Egyptian people, Corona, and the blackout of power	Al Mahboula	66135897Ghazi Aldous	‏. {السداسية الماسية} للتاسيس المبكر للغة العربية { سكر&عنب}	oh god protect free egyptian people corona blackout power	Negative Coping		denial	0.4	0.8	0.444	0	0.556	0.7906	0	1	0	0	108	782	6786	0	10	1
246	246	1.23406e+18	2020-03-01	The political and economic game is a registered sign of the world of promiscuity run by economists whose only concern is collecting money. Let us assume that a vaccine for Corona has been invented for a company that runs the world. How many countries will be forced to buy it at a high price? How many countries will be subject to austerity as a result? And for whom will the money be piled up? We a…	Al Mahboula	66135897Ghazi Aldous	‏. {السداسية الماسية} للتاسيس المبكر للغة العربية { سكر&عنب}	political economic game registered sign world promiscuity run economists whose concern collecting money let us assume vaccine corona invented company runs world many countries forced buy high price many countries subject austerity result money piled up waiting	Negative Coping		denial	0.054815	0.419259	0	0.078	0.922	-0.7461	0	0	0	0	108	782	6786	0	10	1
881	881	1.23417e+18	2020-03-01	Corona won’t stop us 😂	Bartone	Reem Kh.		corona wont stop us face with tears of joy	Positive Coping	positive reframing		0.8	0.2	0.419	0.14	0.442	0.5842	0	0	0	0	104	97	3189	0	17	0
243	243	1.23406e+18	2020-03-01	Corona, O divine soldier, and I have confidence in God’s promises, victory for the believers. I appeal to you, by God, whose name does not harm the earth and the sky, not to harm the monotheists in my country and in the countries of the Muslims. Oh God, the smell of poisons, locusts, lice, and your soldiers, your enemies and the enemies of the community of Muhammad.	Al Mahboula	66135897Ghazi Aldous	‏. {السداسية الماسية} للتاسيس المبكر للغة العربية { سكر&عنب}	corona divine soldier confidence god promises victory believers appeal you god whose name harm earth sky harm monotheists country countries muslims oh god smell poisons locusts lice soldiers enemies enemies community muhammad	Positive Coping	mindfullness practices		0	0	0.224	0.117	0.659	0.8074	0	0	0	0	108	782	6786	0	10	0
242	242	1.23457e+18	2020-03-02	Gym The era of Corona Corona Kuwait_confronts_Corona tcoabrrltfjcq	Al Mahboula	M7MD 🦅	Egyptian in Kuwait🇪🇬🇰🇼... Barca 💙❤️ Al AHLY ❤️..(gym &⚽️) the air I breath.. 🤷🏻‍♂️	gym era corona corona kuwait_confronts_corona	Positive Coping	mindfullness practices		0	0	0	0	1	0	2	0	1	1	301	632	4052	0	20	0
876	876	1.23456e+18	2020-03-02	Dar Al Shifa Hospital in Kuwait Tomorrow, Tuesday March 3rd at 12:00 noon Kuwait time (11:00 am Cairo time) will have live streaming of a presentation and discussion on Update in corona (covid-19). Three doctors, in addition to me, will be Sharing In that discussion https://t.co/bwS78f5YKY	Al Salmiyah	dr. magdi elnawawi		dar al shifa hospital in kuwait tomorrow tuesday march rd at noon kuwait time am cairo time will have live streaming of a presentation and discussion on update in corona covid three doctors in addition to me will be sharing in that discussion	Positive Coping	positive reframing		0.136364	0.5	0.062	0	0.938	0.4215	3	0	5	0	272	216	208	2	19	0
877	877	1.23453e+18	2020-03-02	COVID-19 Awareness 🤣 https://t.co/t0PRREzndY	Bayan	Alaa Alsayegh🇰🇼🏴󠁧󠁢󠁳󠁣󠁴󠁿🇬🇧	🍀💊Forensic toxicologist, Msc.Forensic Toxicology(@UofGlasgow 2015), Bsc.Pharmacology(@UofLiverpool 2001) 💫	covid awareness rolling on the floor laughing	Positive Coping	mindfullness practices		0	0	0.348	0	0.652	0.4939	0	0	0	0	306	399	6983	8	17	0
878	878	1.2345e+18	2020-03-02	So my selfie atempts at the moment result with a personal photo of the corona virus.	Al Jabriyah	hussain	alot more than u can handle!! #khafeef	so my selfie atempts at the moment result with a personal photo of the corona virus	Positive Coping	mindfullness practices		0	0.3	0	0	1	0	0	0	0	0	729	1151	20908	7	15	0
879	879	1.23445e+18	2020-03-02	During our Covid-19 Awareness today👍 https://t.co/lOA65WbuGi	KOC Ameera Court Block A	Thadz	If I were to give myself A single present It would be: Confidence	during our covid awareness today thumbs up	Positive Coping	engaging in relaxation techniques		0	0	0	0	1	0	0	0	1	0	150	382	2875	5	12	0
880	880	1.23439e+18	2020-03-02	I'm no doctor but that's exactly my thoughts. Wearing the mask 24/7 is not the solution, being careful is. https://t.co/0xuu8vqTRK	Mina Abdulla	Nawaf Burhama 	Superhero...sometimes a boxer 😜🥊 @suengineering graduate 👨‍🎓	im no doctor but thats exactly my thoughts wearing the mask is not the solution being careful is	Positive Coping	problem-solving		0.075	0.625	0.091	0.193	0.716	-0.2831	0	0	0	0	422	261	54627	10	7	0
875	875	1.23458e+18	2020-03-02	@Aljassar93 Happy corona chicken 😂	Al Surra	thezeekwt	Live ur day like it's ur last ..🌸	happy corona chicken face with tears of joy	Positive Coping	mindfullness practices		0.333333	0.716667	0.521	0.132	0.347	0.765	0	1	0	0	165	214	4695	0	21	0
241	241	1.23487e+18	2020-03-03	Praying for Kuwait in various languages ​​of the world. The charity of the people of Kuwait. I said the prayer in a place. Oh God, remove from us, through the prayers of the poor and the needy, the disease and affliction. Oh God, protect Kuwait and its people from the evil of Kuwait. Pray for Kuwait Corona tcoblkgdzsilz	Al Mahboula	د. أنوار النجار	استشاري طب العائلة واختصاصي علاج التدخين بأنواعه مستوصف فيت ميديكال كلينك- عضوة في الكلية الملكية البريطانية - دبلوم تخصصي في السكر - دورات تخصصية في التجميل	praying kuwait various languages ​​of world charity people kuwait said prayer place oh god remove us prayers poor needy disease affliction oh god protect kuwait people evil kuwait pray kuwait corona	Positive Coping	mindfullness practices		-0.46667	0.7	0.196	0.135	0.668	0.3612	0	0	0	0	1486	262	3857	5	15	0
872	872	1.23479e+18	2020-03-03	@AvisoAda @fumfumfum3 Wow. Daming ganap ni Fumi. Been very busy these past few days, fighting corona virus is so hard and scary po :( #MIWYPastForward @fumfumfum3 Fumiya Yuta	Al Ahmady City	A_SOLID FUMI ❤️	| Registered Nurse 👩🏼‍⚕️ | Roman Catholic ✝️ | OFW |📍Kuwait |	wow daming ganap ni fumi been very busy these past few days fighting corona virus is so hard and scary po miwypastforward fumiya yuta	Negative Coping		venting of emotions	-0.16861	0.546944	0.111	0.334	0.555	-0.767	0	0	0	0	550	506	5786	0	10	1
873	873	1.23472e+18	2020-03-03	When you’re scared to cough in the meeting room so nobody suspects you have corona 😷	The Sea Front	حوراء حسن المتروك	ҫнакиоом 🧜🏻‍♀️ قل الحكي أحيان ... من كثر الإحساس	when youre scared to cough in the meeting room so nobody suspects you have corona face with medical mask	Positive Coping	positive reframing		0	0	0	0.247	0.753	-0.6786	0	1	5	0	1709	1273	37359	8	5	0
869	869	1.23491e+18	2020-03-03	Day 5 Home quarantine = more partying at home 😂 https://t.co/T88cwzIFJs	Ashbeliah	Fai Al-H🇰🇼	Simply another dreamer but hopefully a one of a kind achiever ☆ Some day a motivational speaker ☆ Positive vibes all the way♡ Physical therapist	day home quarantine more partying at home face with tears of joy	Positive Coping	engaging in relaxation techniques		0.65	0.35	0.38	0.108	0.512	0.6997	0	0	0	0	381	249	29708	4	18	0
870	870	1.23488e+18	2020-03-03	@AbrarZenkawi Batman seems more powerful since the Corona is what all the people fear about.	Al Salam	Bazooka	‏‏‏‏‏لا يوجد حيوان في العالم أكثر وحشية من الإنسان السيء.	batman seems more powerful since the corona is what all the people fear about	Positive Coping	mindfullness practices		0.4	0.75	0.169	0.175	0.656	-0.0276	0	2	0	0	893	548	72641	4	16	0
874	874	1.23469e+18	2020-03-03	Let’s hope for a corona free oncall 🦠	Al Sharq	حوراء حسن المتروك	ҫнакиоом 🧜🏻‍♀️ قل الحكي أحيان ... من كثر الإحساس	lets hope for a corona free oncall microbe	Positive Coping	positive reframing		0.4	0.8	0.508	0	0.492	0.7351	0	0	2	0	1709	1273	37359	8	4	0
871	871	1.23483e+18	2020-03-03	Please don’t say this is true... 🖕🏼 Corona https://t.co/h3XCRG1LeQ	Al Mirqab	JM		please dont say this is true banning shesha middle finger corona	Negative Coping		wishful thinking	0.175	0.325	0.338	0	0.662	0.6249	0	1	2	0	999	1000	12677	3	13	1
868	868	1.23499e+18	2020-03-04	I need to use hand lotion as much as I use sanitizer	Al Rawda	دلال السليـمي		i need to use hand lotion as much as i use sanitizer	Positive Coping	engaging in relaxation techniques		0.2	0.2	0.225	0	0.775	0.4939	0	0	0	0	916	196	11801	2	0	0
867	867	1.23513e+18	2020-03-04	Since #Covid_19 break out ... I never heard some one #sneezing or #coughing around me and in any open place. People are controlling their attitude with fear.	غرفة تجارة و صناعة الكويت	Ali Alkulaib - A.Vice President Engineering.	@ALAFCO Aviation Lease & Finance - Kuwait. @Airbus @Boeing - Airbus Flight Test Engineer.	since covid break out i never heard some one sneezing or coughing around me and in any open place people are controlling their attitude with fear	Positive Coping	positive reframing		0	0.5	0	0.113	0.887	-0.4939	2	1	2	0	1960	3866	10705	59	8	0
866	866	1.23513e+18	2020-03-04	Wear a mask. Don’t care what people say. Safety is important. Even though they say it doesn’t protect you from Corona, but it does protect you from touching your face! You don’t know what surface your hand touches. Stay safe! #coronavirus https://t.co/3CHVdifvPA	Al Qibla	Sarah | سارة 🐘	I am the person in the picture.	wear a mask dont care what people say safety is important even though they say it doesnt protect you from corona but it does protect you from touching your face you dont know what surface your hand touches stay safe coronavirus	Positive Coping	problem-solving		0.466667	0.666667	0.284	0.065	0.651	0.9089	1	0	1	0	18213	861	51491	179	9	0
864	864	1.23522e+18	2020-03-04	Online shopping.. let’s just say that quarantine is wasting my money 😂🤷🏼‍♀️	Ashbeliah	Fai Al-H🇰🇼	Simply another dreamer but hopefully a one of a kind achiever ☆ Some day a motivational speaker ☆ Positive vibes all the way♡ Physical therapist	online shopping lets just say that quarantine is wasting my money face with tears of joy woman shrugging	Positive Coping	engaging in relaxation techniques		0.8	0.2	0.144	0.174	0.682	0.0516	0	0	0	0	381	249	29708	4	15	0
863	863	1.23523e+18	2020-03-04	#كورونا @ Kuwait City https://t.co/VHWq3FCvIl	Al Qibla	@Mohey_Eldin14🇪🇬🇦🇹	امي هيا حياتي وبدونها لا حياه😘 عائلتي ربنا ما يحرمني منهم 😘 حمودي اجمل ما في حياتي💪 الزمالك اسلوب حياه #عاش_الزمالك💪✌👍⌛	kuwait city	Positive Coping	mindfullness practices		0	0	0	0	1	0	0	0	2	0	10369	7281	14435	0	15	0
862	862	1.23527e+18	2020-03-04	Due to COVID-19 https://t.co/vEdeM88T6c	Qortuba	دانه عبدالكريم الهملان	Speech-Language Pathologist🧠🗣💗. ربِ إرحمهما كما ربياني صغيرا🌸.	due to covid online training course	Positive Coping	engaging in relaxation techniques		-0.125	0.375	0	0	1	0	0	1	1	0	868	288	56793	2	18	0
865	865	1.23519e+18	2020-03-04	#Corona will not last long ... because it is made in China	Al Jabriyah	؏ــڕابــۃ ۖ اڵــمســٱحــٱټ ּڕٻــم ؏ــبــد ا̍ڵــﷶ	يا دارنا يا دار يا نجمة للسنا السحر لما دنا غنى لها الأشعار يا نفحة للأريج مست عروس الخليج فجر و روض بهيج ما أسعد الأطيار🇪🇬نوبية مصرية مواليد الكويت🇰🇼٧٥🇰🇼	corona will not last long because it is made in china	Positive Coping	mindfullness practices		-0.025	0.233333	0	0	1	0	1	2	4	0	25288	26033	330413	10	13	0
240	240	1.23553e+18	2020-03-05	drbaselalsabah Oh God, protect the leader of humanitarian work, the pioneer of charitable work, the government, the people, the generous, the generous, the generous, the generous, the cooperative, the people of ancient gifts and terrors, may God protect her. The most severe epidemic of Corona is the epidemic of confrontational arrogance and the hateful lurkers. Corona is easier.	Al Mahboula	66135897Ghazi Aldous	‏. {السداسية الماسية} للتاسيس المبكر للغة العربية { سكر&عنب}	drbaselalsabah oh god protect leader humanitarian work pioneer charitable work government people generous generous generous generous cooperative people ancient gifts terrors may god protect her severe epidemic corona epidemic confrontational arrogance hateful lurkers corona easier	Positive Coping	mindfullness practices		0.55	0.65	0.324	0.181	0.495	0.8862	0	0	0	0	108	782	6786	0	11	0
856	856	1.23558e+18	2020-03-05	Getting a good vibes and energy from the health benefits of having a himalayan salt lamp in times like this situation we facing from the corona virus. https://t.co/BegOtu6jrF	Al Salmiyah	Mitchicoke22	youtuber : mitchicoke22 Instagram: mitchicoke22	getting a good vibes and energy from the health benefits of having a himalayan salt lamp in times like this situation we facing from the corona virus	Positive Coping	engaging in relaxation techniques		0.7	0.6	0.305	0	0.695	0.8442	0	0	0	0	14	20	36	0	15	0
853	853	1.23571e+18	2020-03-05	I enrolled in the #OpenWHO course Infection Prevention and Control (IPC) for Novel Coronavirus (COVID-19) https://t.co/6kLZlJf0qj	Kuwait	Seniors 🩺	Official Account for AGU’s 2021 batch. 👩🏻‍⚕️👨🏻‍⚕️ حساب لنشر جميع مايتعلق بدفعة 2015/2016 - سنة سادسة	i enrolled in the openwho course infection prevention and control ipc for novel coronavirus covid	Positive Coping	engaging in relaxation techniques		0	0	0.141	0	0.859	0.3182	0	0	1	0	191	1	1645	1	23	0
854	854	1.2356e+18	2020-03-05	staying in thursday on netflix , drenching myself in hair treatments, having a face mask on is what an ideal thursday for me 😍 #selfloveisthebestlove	Qortuba	منيه المهيني	وَعَسَى أَنْ تَكْرَهُوا شَيْئًا وَهُوَ خَيْرٌ لَكُمْ 🤍	staying in thursday on netflix drenching myself in hair treatments having a face mask on is what an ideal thursday for me smiling face with hearteyes selfloveisthebestlove	Positive Coping	engaging in relaxation techniques		0.9	1	0.204	0	0.796	0.7506	1	0	4	0	1399	262	4962	3	16	0
855	855	1.23559e+18	2020-03-05	Cornona Beach #تمديد_العطله #كورونا #كورونا_الكويت https://t.co/dCAeB8YK63	Al Joan Resort	أحمد المعوشرجي 🇰🇼	Kuwaiti .. enough said.	cornona beach	Negative Coping		wishful thinking	0	0	0	0	1	0	0	2	4	1	1307	652	15269	5	15	1
857	857	1.23551e+18	2020-03-05	Even this drive thru #NBK ATM has a hand sanitizer 👏🏼👏🏼. No one can say that #kuwait didn’t do a proper job in mitigating the spread of #COVIDー19 https://t.co/ZI6IKE2kJq	National Bank of Kuwait	Ⓜ️ⓐⓡⓘⓔⓛ		even this drive thru nbk atm has a hand sanitizer clapping hands clapping hands no one can say that kuwait didnt do a proper job in mitigating the spread of covid	Positive Coping	mindfullness practices		0	0.1	0.079	0.054	0.866	0.25	0	0	3	0	256	680	1666	2	10	0
859	859	1.23547e+18	2020-03-05	#coronavirus Song 🎶😅 It's catchy! #thursdayvibes https://t.co/j6AQpnxY3r	Al Ahmady City	iBritsy 🇰🇼❤️🇬🇧	A British 🇬🇧 / Kuwaiti 🇰🇼 Who loves to travel ✈️ i want to create memories all over the world 🌍 Instagram : @iBritsy	coronavirus song musical notes grinning face with sweat its catchy thursdayvibes	Positive Coping	engaging in relaxation techniques		0	0	0.2	0	0.8	0.3612	1	0	2	0	302	43	9576	0	7	0
860	860	1.23543e+18	2020-03-05	Our school has been closed for two weeks to try to manage the cases of Coronavirus in Kuwait. Thankfully it’s getting warm enough to use the pool again... it’s a hard life 🤷🏻‍♀️😏 https://t.co/czq0eFTtE7	Al Mahboula	Georgia Geering	👩🏻‍🏫 ITE Primary MFL Tutor | 🇪🇸 🇫🇷 Languages | 🌳 Forest School | 🌍 International Teaching	our school has been closed for two weeks to try to manage the cases of coronavirus in kuwait thankfully its getting warm enough to use the pool again its a hard life woman shrugging smirking face	Positive Coping	engaging in relaxation techniques		0.121667	0.488333	0.112	0.033	0.855	0.5106	0	0	3	0	87	83	132	0	5	0
861	861	1.23541e+18	2020-03-05	I genuinely feel bad for people who use ANTI-BACTERIAL sanitizer for a fucking VIRUS. Just use water... The herd is still enjoying their hive mind.	Al Adailiya	Mohammed Al-Hottie	Dynamite with a laser beam	i genuinely feel bad for people who use antibacterial sanitizer for a fucking virus just use water the herd is still enjoying their hive mind	Positive Coping	mindfullness practices		-0.1	0.641667	0.114	0.117	0.769	-0.0258	0	0	0	0	273	621	18570	4	3	0
858	858	1.2355e+18	2020-03-05	Nice online CME course (novel coronavirus physician guide ) from @acpinternists ✅ https://t.co/RjQ2MCb6oK	Al-Amiri Hospital | مستشفى الأميري	Dr. Ali Aldei علي الدعي	Rheumatologist كويتي ، طبيب باطنية و روماتزم ،@uoft @kfshrc @rcsi_irl @royale_hayat مستشفى رويال حياة 25360000	nice online cme course novel coronavirus physician guide from check mark button	Positive Coping	engaging in relaxation techniques		0.6	1	0.338	0	0.662	0.6249	0	0	1	0	2349	1275	2983	14	9	0
852	852	1.23574e+18	2020-03-06	Let's all take a moment of silence for the Corona virus's sacrifice. Taking a critical hit in reputation just to teach people basic hygiene.	Al Rawda	Mohammed Al-Hottie	Dynamite with a laser beam	lets all take a moment of silence for the corona viruss sacrifice taking a critical hit in reputation just to teach people basic hygiene	Negative Coping		venting of emotions	0	0.4625	0	0.091	0.909	-0.3182	0	0	0	0	273	621	18570	4	1	1
851	851	1.23586e+18	2020-03-06	Face mask day 👵🏻	Al Rawda	𝚜𝚢	-English Teacher .	face mask day old woman	Positive Coping	engaging in relaxation techniques		0.25	0.45	0	0	1	0	0	0	0	0	1249	147	50905	2	9	0
850	850	1.23587e+18	2020-03-06	Blessing 🙏🙏🙏🙏 Please God help the humanity from epidemic diseases..🙏🙏🙏🙏 https://t.co/JVF3nlSsJO	Al Mansouriyah	Dr. kazem marafie	اااه يا خوفى من🪱🦟🐞🪲🐜🕷🪳📍	blessing folded hands folded hands folded hands folded hands please god help the humanity from epidemic diseases folded hands folded hands folded hands folded hands	Positive Coping	mindfullness practices		0	0	0.329	0	0.671	0.8519	2	2	2	0	4025	2244	117372	35	10	0
849	849	1.23592e+18	2020-03-06	May Allah protect the Holy #Kaaba, #Mecca, Custodian of the Two Holy Mosques, #AlSaud, people and the Kingdom of #SaudiArabia from #coronavirus. #MesharyAbul 🕋🇸🇦 https://t.co/avcVDAY4bB	مكة المكرمة	Meshary Abul | مشاري أبل	الفنان في الشرق الأوسط M.E Official Artist Perf. Talent in Art & Music - Art Gallery & Photography 🎨🎵🌍🇰🇼	may allah protect the holy kaaba mecca custodian of the two holy mosques alsaud people and the kingdom of saudiarabia from coronavirus mesharyabul kaaba saudi arabia	Positive Coping	mindfullness practices		0	0	0.094	0	0.906	0.3818	0	0	1	0	363	681	1524	4	13	0
848	848	1.23594e+18	2020-03-06	@atrupar @gtconway3d All of the Trump hotels/resorts should be requisitioned by the government and turned into quarantine centers.	Al Mahboula	John Hicks	Retired Detroit banker/boomer proud to be blocked by Sebastian Gorka, looney lawyer Sidney Powell, & by AmyMek Islamaphobic bigot.	all of the trump hotelsresorts should be requisitioned by the government and turned into quarantine centers	Positive Coping	mindfullness practices		0	0	0	0	1	0	4	5	62	0	50	43	10573	1	14	0
847	847	1.23594e+18	2020-03-06	Corona can’t do shit to me💪🏼🔥 https://t.co/A9xwwVwXyD	Al-Qurain sports club	TA Mishal	| Baller🏀 | Kuwait national Team #5 | Mechanical Engineering⚙️ |	corona cant do shit to me flexed biceps fire	Positive Coping	engaging in relaxation techniques		-0.2	0.8	0.191	0.157	0.653	0.1341	1	0	4	0	97	113	764	0	15	0
846	846	1.23599e+18	2020-03-06	@dabeard @brhodes The Kuwait government requisitioned a hotel/resort as a quarantine center. The US should do the same with all Trump hotels &amp; resorts.	Al Mahboula	John Hicks	Retired Detroit banker/boomer proud to be blocked by Sebastian Gorka, looney lawyer Sidney Powell, & by AmyMek Islamaphobic bigot.	the kuwait government requisitioned a hotelresort as a quarantine center the us should do the same with all trump hotels amp resorts	Positive Coping	mindfullness practices		-0.05	0.1125	0	0	1	0	0	1	6	0	50	43	10573	1	17	0
845	845	1.23599e+18	2020-03-06	@PodSaveAmerica The Kuwait government has requisitioned a hotel resort as a quarantine center. The US should do the same thing with all Trump hotels and resorts.	Al Mahboula	John Hicks	Retired Detroit banker/boomer proud to be blocked by Sebastian Gorka, looney lawyer Sidney Powell, & by AmyMek Islamaphobic bigot.	the kuwait government has requisitioned a hotel resort as a quarantine center the us should do the same thing with all trump hotels and resorts	Positive Coping	mindfullness practices		-0.05	0.1125	0	0	1	0	0	0	1	0	50	43	10573	1	18	0
843	843	1.23601e+18	2020-03-06	please avoid crowded place on #Holi day guys celebrate #Holi with your family and aware from #Covid_19	Khaitan	Saddam	Te amo 🤗	please avoid crowded place on holi day guys celebrate holi with your family and aware from covid	Positive Coping	problem-solving		0.25	0.25	0.27	0.099	0.631	0.5859	0	0	0	0	15	57	50	0	19	0
842	842	1.23604e+18	2020-03-06	the people not come in mubarakiya kuwait city because of corona virus the people are too scared and all shops are empty and shop owner tense. Or may Allah protect us from this corona disease, and those who are affected by this disease, health and wellbeing at the heart aamin https://t.co/1EzCnwo8id	Al Qibla	M.N.Rathore	Iam a indian	the people not come in mubarakiya kuwait city because of corona virus the people are too scared and all shops are empty and shop owner tense or may allah protect us from this corona disease and those who are affected by this disease health and wellbeing at the heart aamin	Positive Coping	mindfullness practices		-0.21667	0.5	0.114	0.146	0.739	0.0258	1	0	1	0	155	2198	3539	0	21	0
239	239	1.23588e+18	2020-03-06	Corona: Panic and belittlement, between indignation and exhortation, and between submission and kneeling, between exaggeration and flattery, and between honesty and negligence.	Al Mahboula	66135897Ghazi Aldous	‏. {السداسية الماسية} للتاسيس المبكر للغة العربية { سكر&عنب}	corona panic belittlement indignation exhortation submission kneeling exaggeration flattery honesty negligence	Negative Coping		self-blame	0	0	0.157	0.229	0.614	-0.4767	0	0	0	0	108	782	6786	0	11	1
238	238	1.23596e+18	2020-03-06	Corona_Egypt They are trying to repeat what they did in China and Iran, the filth that happened in China, it is an economic and political war, one of its arms is the biological war, and the human beings are going shrewdly, it does not matter, the most important thing is that China’s economic wheel stops and America maintains its strength, the original Egypt	Al Mahboula	البدرى المقدم الهواري	شيخ العرب هوارة علمتنا معنى الإنتماء علمتنا الكرم والكرامة والكبرياء علمتنا معنى الرجولة ومعنى الصداقة والوفاء	corona_egypt trying repeat china iran filth happened china economic political war one arms biological war human beings going shrewdly matter important thing china economic wheel stops america maintains strength original egypt	Negative Coping		denial	0.239286	0.407143	0.103	0.141	0.756	-0.4369	8	1	28	0	632	132	12043	0	16	1
844	844	1.236e+18	2020-03-06	Protect yourself and your community from coronavirus with common sense precautions: wash your hands, stay home when sick and listen to the and local health authorities. Save the masks for health care workers. Let’s stay calm, listen to the experts, and follow the science. https://t.co/by6prNHhRf	Kuwait City	Kishan patel	beautiful face is not important beautiful heart is important.	protect yourself and your community from coronavirus with common sense precautions wash your hands stay home when sick and listen to the and local health authorities save the masks for health care workers lets stay calm listen to the experts and follow the science	Positive Coping	problem-solving		-0.17857	0.526786	0.211	0.062	0.728	0.7906	0	0	0	0	16	368	55	3	18	0
841	841	1.2361e+18	2020-03-07	By chance coincidence as I watch the American series Arrow, part three, episode 19, I watched passage a Bilogi weapon, which one of the American officers tries to spread in China because he believes that China poses an economic and military threat to America. #coronavirus https://t.co/6NYm8TOeGl	Al Nuzha	عَبْداللَطِيف اِلِرزيحان🇰🇼	الله ثم،الوطن،الأمير	by chance coincidence as i watch the american series arrow part three episode i watched passage a bilogi weapon which one of the american officers tries to spread in china because he believes that china poses an economic and military threat to america coronavirus	Negative Coping		denial	0	0.14	0.041	0.115	0.844	-0.5574	0	0	0	0	313	174	2807	0	1	1
237	237	1.23623e+18	2020-03-07	It turns the health issue into a disparagement, insult, or belittlement of a more severe virus, the Corona virus. Preserving the human soul does not mean at all a disparagement unless the goal is to exterminate humanity.	Al Mahboula	66135897Ghazi Aldous	‏. {السداسية الماسية} للتاسيس المبكر للغة العربية { سكر&عنب}	turns health issue disparagement insult belittlement severe virus corona virus preserving human soul mean disparagement unless goal exterminate humanity	Negative Coping		denial	0.21875	0.429167	0	0.15	0.85	-0.7346	0	0	0	0	108	782	6786	0	10	1
827	827	1.23643e+18	2020-03-07	-Yo all! No matter how bad it is, no matter how we really scared right now, no matter how stressed we are right now...we still need to find a way to be happy! Inshaallah..Corona free! 🙏🏻❤️	Al Farwaniya	Roy Caimoy		yo all no matter how bad it is no matter how we really scared right now no matter how stressed we are right nowwe still need to find a way to be happy inshaallahcorona free folded hands red heart	Positive Coping	mindfullness practices		0.208929	0.554762	0.198	0.218	0.584	0.4376	0	0	0	0	1	152	15	0	23	0
828	828	1.23641e+18	2020-03-07	Thanks china 🇨🇳 for everything you have done so far fighting corona virus. God bless you #China #Corona	Mishrif	علي حبيب 🇰🇼	عندما يكون الظلم قانون... يكون التمرد واجب.	thanks china china for everything you have done so far fighting corona virus god bless you china corona	Negative Coping		denial	0.15	0.6	0.317	0.113	0.57	0.6151	0	0	1	0	6139	986	30319	4	21	1
829	829	1.23636e+18	2020-03-07	Wow! So interesting and terrifying at the same time. #virus #pandemic https://t.co/5HHogUnftY	Salwa	Vanessa Temple	Academic Director, Kuwait. 🌟	wow so interesting and terrifying at the same time virus pandemic	Negative Coping		venting of emotions	-0.1	0.65625	0.362	0.211	0.427	0.4271	0	0	1	0	792	1083	14671	32	18	1
830	830	1.23632e+18	2020-03-07	What's the Point of canclelling HOLI MILAN in the fear of Coronavirus when you force people to go to crowded places, Like this ☑️ #YesBankScam #Yes_Bank https://t.co/Hwu0c4NsZb	SUBWAY	みusen™	﷽ Businessmen owned a Company named AMIR™ Garments.. Cricketer, Part time Chef, Subscribe me at youtube https://t.co/yXxuTEVJWC	whats the point of canclelling holi milan in the fear of coronavirus when you force people to go to crowded places like this check box with check yesbankscam yes bank	Negative Coping		denial	0	0	0.147	0.09	0.763	0.25	22	1	68	1	118	68	14400	0	15	1
831	831	1.23625e+18	2020-03-07	@aajtak @diwanshu_tomar Into corona virus ka bhee Dar nahee hei. Dilli mein mahamari bhee Shaheen Bagh sr Suri ho sakte hei .Lack of education, lack of understanding will result in danger to life of these as well others. Shaheen Bagh model protest ke saath spreading of life threatening disease ka bhee	Al Salmiyah	Satyamew Jayte		into corona virus ka bhee dar nahee hei dilli mein mahamari bhee shaheen bagh sr suri ho sakte hei lack of education lack of understanding will result in danger to life of these as well others shaheen bagh model protest ke saath spreading of life threatening disease ka bhee	Negative Coping		venting of emotions	0	0	0.036	0.229	0.735	-0.8834	0	0	0	0	20	70	3437	0	11	1
832	832	1.23624e+18	2020-03-07	“Remember *W-U-H-A-N* : W - wash hands U - use mask properly H - have temperature checked regularly A - avoid large crowds N - never touch your face with unclean hands😰	Abdulla Al Salem	مي الظاهر ⚖️	مستشارة والمحامي امام المحكمة الدستورية ومحكمة التمييز🇰🇼🇬🇧 رأيي يمثلني بصفتي الشخصية	remember wuhan w wash hands u use mask properly h have temperature checked regularly a avoid large crowds n never touch your face with unclean hands anxious face with sweat	Positive Coping	problem-solving		-0.00893	0.401374	0	0.13	0.87	-0.4939	0	1	2	0	24696	916	115615	26	10	0
840	840	1.23616e+18	2020-03-07	People walking round the airport with masks on then taking them off when in close contact with people to talk.. explain ur dumb selves	Airport Area	Abby	Insta: Abby.fletch	people walking round the airport with masks on then taking them off when in close contact with people to talk explain ur dumb selves	Negative Coping		venting of emotions	-0.2875	0.45	0	0.125	0.875	-0.5106	0	0	1	0	789	1706	4916	1	5	1
834	834	1.23623e+18	2020-03-07	Annual Vaccination time #Cleo (@ International Veterinary Hospital in Mina Abdullah, Ahmadi) https://t.co/PHCGdWR2DC https://t.co/Hb8Sw7cZgL	Dulay Al Zunif	Kamaleddine Marafie	༺łłł༻ A Marine Engineer with 9 years of seatime Now in the drivers ed biz here in 🇰🇼 ༺łłł༻	annual vaccination time pet cleo international veterinary hospital in mina abdullah ahmadi	Positive Coping	engaging in relaxation techniques		0	0	0	0	1	0	0	0	0	0	183	116	28020	23	9	0
835	835	1.23622e+18	2020-03-07	Exams cancelled, Flights suspended, imports &amp; exports suspended from to effected countries...The worldwide disaster looks something beyond our imagination #CoronaVirus	Al Ahmady	Uno	Jabra fan. #Prabhas #SRK #SSR	exams cancelled fs suspended imports amp exports suspended from to effected countriesthe worldwide disaster looks something beyond our imagination coronavirus	Negative Coping		avoidance	0	0	0	0.435	0.565	-0.9062	0	0	0	0	2180	163	32155	10	9	1
836	836	1.23622e+18	2020-03-07	Be Safe from #coronavirus infection	Mina Abdulla	iSPR	Philocalist, Engineer, Photography Learner, Music, “Thalaivar”, missing my home town badly..Want to be a god to god and make him as me. ***Love conquers all***	be safe from coronavirus infection	Positive Coping	engaging in relaxation techniques		0.5	0.5	0.42	0	0.58	0.4404	0	0	0	0	726	1618	11735	2	9	0
837	837	1.23621e+18	2020-03-07	I think This coronavirus has already existed long ago and people have already been exposed to this virus,it’s just that they’re making it a bomb today.	Al Farwaniya	Amy Nuesca	I love individuality and a little bit different.	i think this coronavirus has already existed long ago and people have already been exposed to this virusits just that theyre making it a bomb today	Negative Coping		denial	-0.05	0.4	0	0.158	0.842	-0.5423	0	0	2	0	278	646	6828	3	8	1
838	838	1.2362e+18	2020-03-07	I need a side hustle, corona’s vacation in itself, a virus. https://t.co/fy0jawbofS	Starbucks	☯️	A Peanut Butter Enthusiast	i need a side hustle coronas vacation in itself a virus	Negative Coping		wishful thinking	0	0	0	0	1	0	0	0	0	0	664	350	15317	2	7	1
839	839	1.23619e+18	2020-03-07	If ONE MORE PERSON SENDS A CORONA VIRUS WARNING ON MY DADS WHATSAPP IM GONNA LOOSE IT	Al Shuwaikh	فاطمة	I’m bored	if one more person sends a corona virus warning on my dads whatsapp im gonna loose it	Negative Coping		avoidance	0.211538	0.384615	0	0.239	0.761	-0.5719	0	0	6	0	535	293	9073	1	7	1
833	833	1.23623e+18	2020-03-07	RULES FOR LIVING 1. Secure healthy boundaries 2. Witness yourself 3. Speak less 4. Explore more #Corona	Hitteen	عبدالله مبارك عبدالرضا	( insta/bo_mubarak89 ) bachelors degree in physical education and sports and yes I’m not A P.E teacher 🎾🏓🏸⚽️🏀🥊🎾🤾🏼‍♂️⛹🏻‍♂️🤺🤾🏼‍♀️🏋🏼	rules for living secure healthy boundaries witness yourself speak less explore more corona	Positive Coping	positive reframing		0.308333	0.416667	0.317	0	0.683	0.6249	0	0	0	0	393	260	9757	0	10	0
236	236	1.23664e+18	2020-03-08	faisalkandari The stage of forgetting that we have a virus	Al Mahboula	66135897Ghazi Aldous	‏. {السداسية الماسية} للتاسيس المبكر للغة العربية { سكر&عنب}	faisalkandari stage forgetting virus	Positive Coping	mindfullness practices		0	0	0	0	1	0	0	0	0	0	108	782	6786	0	12	0
819	819	1.2368e+18	2020-03-08	Even with the #Coronavirus panic buying, nobody wants to eat Vegan food. #CoronavirusOutbreak #Coronavid19 https://t.co/P5LEm7oPFP	Al Farwaniya	سلمان ناسيب		even with the coronavirus panic buying nobody wants to eat vegan food coronavirusoutbreak coronavid	Positive Coping	mindfullness practices		0.2	0.1	0	0.202	0.798	-0.5106	0	0	3	0	542	41	456	1	23	0
820	820	1.23673e+18	2020-03-08	January: WW3 February: Corona Virus March: Locust swarm 2020 why???😂😂	Salwa	Tay🌸	لربما ينتظرك شيئًا أحب إليك مما فقدت ✨	january ww february corona virus march locust swarm why face with tears of joy face with tears of joy	Positive Coping	mindfullness practices		0.8	0.2	0.288	0.144	0.568	0.7003	0	1	2	0	470	1732	5574	2	19	0
821	821	1.23662e+18	2020-03-08	Corona has me wanting to travel!😭	Al Sharq	Sarah		corona has me wanting to travel loudly crying face	Negative Coping		avoidance	-0.2	0.6	0	0.279	0.721	-0.4767	0	0	0	0	317	173	18807	3	11	1
822	822	1.23657e+18	2020-03-08	@McFaul As penance, Dr Stein should go volunteer at a COVID-19 ICU until the crisis is over.	Al Mahboula	John Hicks	Retired Detroit banker/boomer proud to be blocked by Sebastian Gorka, looney lawyer Sidney Powell, & by AmyMek Islamaphobic bigot.	as penance dr stein should go volunteer at a covid icu until the crisis is over	Positive Coping	mindfullness practices		0	0	0	0.215	0.785	-0.6249	0	0	0	0	50	43	10573	1	8	0
823	823	1.23657e+18	2020-03-08	@DrJillStein Madam Stein, you as much as anyone are to blame for the Trump presidency so how about you shut up and go crawl under a rock the rest of this year. Better yet, as penance go volunteer in a COVID-19 ICU.	Al Mahboula	John Hicks	Retired Detroit banker/boomer proud to be blocked by Sebastian Gorka, looney lawyer Sidney Powell, & by AmyMek Islamaphobic bigot.	madam stein you as much as anyone are to blame for the trump presidency so how about you shut up and go crawl under a rock the rest of this year better yet as penance go volunteer in a covid icu	Negative Coping		denial	0.35	0.35	0.065	0.054	0.88	0.128	0	0	0	0	50	43	10573	1	8	1
824	824	1.23651e+18	2020-03-08	#Corona #كورونا_الكويت Airport check-in https://t.co/sNJFsh696E	Al Mahboula	Oladapo Olayinka	Teacher | Seeking MSc opportunities in Voice Tech, Speech Recognition, Applied Linguistics, General Linguistics, Psycholinguistics, and Consumer behaviour	corona airport checkin	Positive Coping	engaging in relaxation techniques		0	0	0	0	1	0	0	1	2	0	419	2566	5335	1	4	0
825	825	1.2365e+18	2020-03-08	@joshimanasi11 Warning for covid/19	Al Salmiyah	Satyamew Jayte		warning for covid	Negative Coping		venting of emotions	0	0	0	0.545	0.455	-0.34	0	0	0	0	20	70	3437	0	4	1
826	826	1.2365e+18	2020-03-08	Me after hearing someone cough on my $8 round trip flight to #Italy #coronavirus #cabincrew #COVIDー19 https://t.co/YxslI6ZuGd	Al Farwaniya	سلمان ناسيب		me after hearing someone cough on my round trip f to italy coronavirus cabincrew covid	Positive Coping	mindfullness practices		-0.2	0.4	0	0	1	0	0	0	0	0	542	41	456	1	3	0
235	235	1.23681e+18	2020-03-09	The movie Contagion predicted the emergence of the new Corona virus in China tcorvpwvbk ds via YouTube	Al Mahboula	فراشة في مهب الريح🦋	القدس قضيتنا 🇰🇼❤️🇵🇸	movie contagion predicted emergence new corona virus china tcorvpwvbk ds via youtube	Negative Coping		denial	0.136364	0.454545	0	0.158	0.842	-0.4588	0	0	0	0	1480	802	67117	1	0	1
234	234	1.23697e+18	2020-03-09	The last country in which Corona appeared was Egypt. Regardless of when Egypt existed or how it entered, we are treated as if we were the ones who transmitted the virus to the whole world. It is a thing of complete provocation, and words, statements, tweets, and posts are complete disgust.	Al Mahboula	M7MD 🦅	Egyptian in Kuwait🇪🇬🇰🇼... Barca 💙❤️ Al AHLY ❤️..(gym &⚽️) the air I breath.. 🤷🏻‍♂️	last country corona appeared egypt regardless egypt existed entered treated ones transmitted virus whole world thing complete provocation words statements tweets posts complete disgust	Negative Coping		avoidance	0.1	0.316667	0	0.072	0.928	-0.5994	1	0	4	0	301	632	4052	0	11	1
808	808	1.23713e+18	2020-03-09	Nothing feels better than dipping ur hair in lavender mask.💜	Al Dasma	B̲		nothing feels better than dipping ur hair in lavender mask purple heart	Positive Coping	engaging in relaxation techniques		0.5	0.5	0.253	0.145	0.602	0.4203	0	0	0	0	248	98	4701	0	21	0
809	809	1.23711e+18	2020-03-09	Got Tuesday’s paper the night before, The 2 week school closure now is at 4! Parents are panicking, what to do? “We can’t even go to the movies too?!” 😭😞🤬 @mark248am #CoronavirusOutbreak #Kuwait #فيروس_كورونا @kuwaittimesnews @KUWAIT_MOH #Corona #CoronavirusUSA #oilprice https://t.co/0nJ30cpgC2	Kuwait	Adel A Abrahim	Father, Husband, Brother, Son, Friend, Lawyer and Investor... A little bit of everything—through #poetry... #news #law #investing #life #love	got tuesdays paper the night before the week school closure now is at parents are panicking what to do we cant even go to the movies too loudly crying face disappointed face face with symbols on mouth coronavirusoutbreak kuwait corona coronavirususa oilprice	Negative Coping		avoidance	-0.475	0.675	0	0.189	0.811	-0.8442	0	1	4	0	42	242	192	3	20	1
810	810	1.23711e+18	2020-03-09	If police stops you. #SaudiArabia #كورونا_الجديد #Coronavirus https://t.co/jkIM0tPSRP	Al Farwaniya	سلمان ناسيب		if police stops you saudiarabia coronavirus	Positive Coping	mindfullness practices		0	0	0	0.242	0.758	-0.1531	10	1	17	1	542	41	456	1	20	0
816	816	1.23685e+18	2020-03-09	When #CoronavirusOutbreak doesn’t create zombies. #COVIDー19 #فيروس_كورونا_المستجدّ https://t.co/GgqkKeJhaD	Al Farwaniya	سلمان ناسيب		when coronavirusoutbreak doesnt create zombies covid	Positive Coping	mindfullness practices		0	0	0	0.266	0.734	-0.2057	1	0	8	0	542	41	456	1	3	0
812	812	1.23697e+18	2020-03-09	Well said. #CoronavirusOutbreak #Corona #COVID2019 #coronavirus #Coronavid19 https://t.co/cdviLCDyvC	Al Sulaibiya Industrial 1	Chemical Engineering	Welcome to the official Twitter page of Chemical Engineering. We share new content & engage on topics like Industries, Energy, Technology, sustainability etc.	well said coronavirusoutbreak corona covid coronavirus coronavid	Positive Coping	mindfullness practices		0	0	0.259	0	0.741	0.2732	0	0	28	0	9213	1	2189	0	11	0
813	813	1.23697e+18	2020-03-09	@danpfeiffer I'm in Kuwait where the government is controlling the situation competently and effectively. I feel safe here. I leave for the US on Sunday &amp; am very nervous about how the US is dealing with COVID-19. I'm at risk because of my age.	Al Mahboula	John Hicks	Retired Detroit banker/boomer proud to be blocked by Sebastian Gorka, looney lawyer Sidney Powell, & by AmyMek Islamaphobic bigot.	im in kuwait where the government is controlling the situation competently and effectively i feel safe here i leave for the us on sunday amp am very nervous about how the us is dealing with covid im at risk because of my age	Negative Coping		venting of emotions	0.45	0.566667	0.117	0.115	0.768	0.2748	0	0	1	0	50	43	10573	1	11	1
814	814	1.23696e+18	2020-03-09	This amazing man and his team are leading the way in #kindness. How wonderful! #coronavirus #uk @djonesbutchers you get a 🏅 https://t.co/NZRIzR95wI	Salwa	Vanessa Temple	Academic Director, Kuwait. 🌟	this amazing man and his team are leading the way in kindness how wonderful coronavirus uk you get a sports medal	Positive Coping	mindfullness practices		0.8	0.95	0.444	0	0.556	0.9274	0	0	4	0	792	1083	14671	32	10	0
815	815	1.23695e+18	2020-03-09	You may endure hours of pain, but do not settle for a moment 👍 #كورونا #السعاده #الامل_بالله #الكويت#اليأس #الحب #انستا #فن @ Kuwait City https://t.co/IE0uQFCE8M	Al Qibla	Basma Alkuwaitiya Singerالمطربة بسمة الكويتية🎤	rights activist of the stateless and the children of Kuwaiti mothers No to Racism ❌Welcome to freedom. 🕊Slavery falls🙏❤️🇰🇼🇺🇸🇬🇧🇮🇱❤️	you may endure hours of pain but do not settle for a moment thumbs up kuwait city	Positive Coping	positive reframing		0	0	0	0.118	0.882	-0.2846	0	0	1	0	4407	1005	23668	4	9	0
817	817	1.23684e+18	2020-03-09	#CoronaVirusUpdate is the only reason why I still have Twitter on my phone. #كورونا_في_الكويت	Salwa	Feraas M. AL-Sabaa	Born in Cairo 🇪🇬 || Made in Kuwait City 🇰🇼 || كله على الله 🖤🤲🏼	coronavirusupdate is the only reason why i still have twitter on my phone	Positive Coping	seeking social support		0	1	0	0	1	0	0	0	5	0	140	258	4259	0	2	0
818	818	1.23681e+18	2020-03-09	@jeremycorbyn Good from you Mr:Corbyn tweeting about our partners in this world. But what about #Corona? Who do you think behind it?I hope not the US administration?!..and if they are behind it,world super powers should have a word with them,also they have to reveal about the right vaccines!	Kuwait	Muhammad Habib Bushehri بوحسين	كاتب صحفي ومحاضر كويتي🇰🇼مستقل ومدير سابق لدورات اللغة في بريطانيا Kuwaiti Journalist-writer-lecturer & previous English language Admin manger at the UK	good from you mrcorbyn tweeting about our partners in this world but what about corona who do you think behind iti hope not the us administrationand if they are behind itworld super powers should have a word with themalso they have to reveal about the right vaccines	Negative Coping		denial	0.10381	0.640476	0.202	0	0.798	0.9032	0	0	0	0	1177	60	7888	12	0	1
811	811	1.23701e+18	2020-03-09	@realDonaldTrump @kurbaag I am afraid that you are not the publisher of this epidemic Dodo	Jleeb Al Shiyoukh	One Shot	‏‏‏‏‏‏‎‎‎‎‎‎#Videographer For events ‎‎‎‎‎‎#Editor ❤️🇪🇬 وَقَالَ ادْخُلُوا مِصْرَ إِن شَاءَ اللَّهُ آمِن ZAMALEK SC	i am afraid that you are not the publisher of this epidemic dodo	Positive Coping	mindfullness practices		-0.6	0.9	0	0	1	0	0	0	0	0	21	584	441	0	13	0
797	797	1.23738e+18	2020-03-10	@petermonn Sanitize everything with an alcohol wipe. Wear gloves. Wear a mask.	Salwa	Vanessa Temple	Academic Director, Kuwait. 🌟	sanitize everything with an alcohol wipe wear gloves wear a mask	Positive Coping	positive reframing		0	0	0	0	1	0	0	0	0	0	792	1083	14671	32	14	0
796	796	1.23739e+18	2020-03-10	Honey, it's not #flu it's #coronavirus 😅	Al Rumaithiya	Hiba🖤✨	Francophile 🇫🇷.. ♊︎ 📖	honey its not flu its coronavirus grinning face with sweat	Positive Coping	mindfullness practices		0	0	0.369	0	0.631	0.5696	0	0	0	0	2321	493	46116	10	14	0
798	798	1.23738e+18	2020-03-10	@DrJillStein Hey Madam Stein, you are as much to blame as anyone for Trump's electoral college win in 2016. Why don't you do penance by working at a COVID-19 ICU and get out of politics altogether.	Al Mahboula	John Hicks	Retired Detroit banker/boomer proud to be blocked by Sebastian Gorka, looney lawyer Sidney Powell, & by AmyMek Islamaphobic bigot.	hey madam stein you are as much to blame as anyone for trumps electoral college win in why dont you do penance by working at a covid icu and get out of politics altogether	Positive Coping	mindfullness practices		0.5	0.3	0.099	0.063	0.838	0.34	0	0	0	0	50	43	10573	1	13	0
807	807	1.23724e+18	2020-03-10	News: World Economy under crisis Meanwhile Corona Virus : https://t.co/2MSBMy6gnD	Al Ahmady	Uno	Jabra fan. #Prabhas #SRK #SSR	news world economy under crisis meanwhile corona virus laughing	Positive Coping	mindfullness practices		0	0	0	0.369	0.631	-0.6249	0	0	2	0	2180	163	32155	10	4	0
800	800	1.23733e+18	2020-03-10	Some CoronaVirus memes while we have time till college and cinemas opens ( have mercy on my soul ) https://t.co/CbGD9uoVoo	Al Qurain	Hussain albloushi	| future Engineer | Gamer | Technically a vampire | Ack	some coronavirus memes while we have time till college and cinemas opens have mercy on my soul	Positive Coping	engaging in relaxation techniques		0	0	0.135	0	0.865	0.3612	0	0	0	0	7	58	87	0	10	0
801	801	1.23729e+18	2020-03-10	@hughhewitt @washingtonpost Hey Hugh, the CDC calls it by it's official name Coronavirus Disease 19 (COVID-19) you round-eyed SOB.	Al Mahboula	John Hicks	Retired Detroit banker/boomer proud to be blocked by Sebastian Gorka, looney lawyer Sidney Powell, & by AmyMek Islamaphobic bigot.	hey hugh the cdc calls it by its official name coronavirus disease covid you roundeyed sob	Positive Coping	mindfullness practices		0	0	0	0.118	0.882	-0.25	0	0	0	0	50	43	10573	1	8	0
802	802	1.23729e+18	2020-03-10	@TimRunsHisMouth The CDC website calls it Coronavirus Disease 19 (COVID-19) you round-eyed SOB	Al Mahboula	John Hicks	Retired Detroit banker/boomer proud to be blocked by Sebastian Gorka, looney lawyer Sidney Powell, & by AmyMek Islamaphobic bigot.	the cdc website calls it coronavirus disease covid you roundeyed sob	Positive Coping	mindfullness practices		0	0	0	0.167	0.833	-0.25	0	0	0	0	50	43	10573	1	8	0
806	806	1.23726e+18	2020-03-10	Hypnotherapy downloads in first 20 days of @tenweem equal to 4 years of sessions in my clinics. As a thank you to my virtual clients, this weekend’s live hypnosis via my Instagram @drnaif will focus on strenthening the immune system in the shadow of #coronavirus . Date to be set.	Al Surra	د. نايف المطوع Dr. Naif Al-Mutawa	شريك مؤسس @tuhoonapp أستاذ علم نفس اكلينيكي بكلية الطب،جامعة الكويت و دكتور مرخص لعلاج مشاكل نفسية و جنسية ب🇺🇸 🇰🇼 🇶🇦 🇴🇲 🇧🇭 🇦🇪	hypnotherapy downloads in first days of equal to years of sessions in my clinics as a thank you to my virtual clients this weekends live hypnosis via my instagram will focus on strenthening the immune system in the shadow of coronavirus date to be set	Positive Coping	positive reframing		0.128788	0.361111	0.099	0	0.901	0.5719	2	0	2	0	31409	805	25301	304	5	0
805	805	1.23726e+18	2020-03-10	#ShipGym exercise_with_Mask_ #Seaman https://t.co/stSrIm47el	Aeraifjan	Mariner Akash More	I m seaman, I m a Mariner , I love sea nd my Country, I think this space is nt enough to describe me.	shipgym exercise with mask seaman	Positive Coping	engaging in relaxation techniques		0	0	0	0	1	0	0	0	0	0	315	2811	201	0	6	0
804	804	1.23729e+18	2020-03-10	“Coughing in public is the new speaking Arabic at airports.” #COVID19 #كورونا_الجديد	Al Mansouriyah	دانا بالألف	I listen more than I talk and hate loud speakers, I love animals and food 🍩🐶	coughing in public is the new speaking arabic at airports covid	Positive Coping	mindfullness practices		0.068182	0.260606	0	0	1	0	0	0	2	0	5409	393	12295	2	8	0
803	803	1.23729e+18	2020-03-10	@GOPLeader Hey Kevin, you must not have clicked on the website. It's called Coronavirus Disease 19 (COVID-19) you round-eyed SOB.	Al Mahboula	John Hicks	Retired Detroit banker/boomer proud to be blocked by Sebastian Gorka, looney lawyer Sidney Powell, & by AmyMek Islamaphobic bigot.	hey kevin you must not have clicked on the website its called coronavirus disease covid you roundeyed sob	Positive Coping	mindfullness practices		0	0	0	0.105	0.895	-0.25	0	0	0	0	50	43	10573	1	8	0
799	799	1.23737e+18	2020-03-10	@edjustdid Screw COVID-19 he was supposed to be in Kuwait w weeks ago 😭😓	Mubarak Al Kabeer	Maan (マーン) 🇰🇼	‏‏‏‏‏ ‏‏معن خالد محمد خالد الفرج ‎‎‎Comfest Kuwait ‎	screw covid he was supposed to be in kuwait w weeks ago loudly crying face downcast face with sweat	Negative Coping		avoidance	-0.2	0.6	0	0.313	0.687	-0.743	0	1	3	1	238	108	3632	0	13	1
233	233	1.23775e+18	2020-03-11	Masks Corona_in_Kuwait Corona_Kuwait Kuwait Corona_Saudi Arabia Corona_Egypt Corona Sterilizer Prevention_and_Safety Ministry_of_Health_Council_of_Minister Make a protective mask for epidemics yourself tcotjrbele t via youtube	Al Mahboula	فراشة في مهب الريح🦋	القدس قضيتنا 🇰🇼❤️🇵🇸	masks corona_in_kuwait corona_kuwait kuwait corona_saudi arabia corona_egypt corona sterilizer prevention_and_safety ministry_of_health_council_of_minister make protective mask epidemics tcotjrbele via youtube	Positive Coping	engaging in relaxation techniques		0	0	0	0	1	0	0	0	0	0	1480	802	67117	1	14	0
779	779	1.23779e+18	2020-03-11	Return from uk to Kuwait to watch a country go into lockdown... school closure now forced national "holiday" closed cafes / shops / shopping malls grounded flights. #Corona #cronacation	Al Mahboula	stephen ralph	Welcome to 'The Hunt' - WildCatPoker is out in force, ask me how to jump into tier 1? 🏆 WPTWOC PLO8 champ🏆 Bearded, tattooed Irish hunter of betting discs!!	return from uk to kuwait to watch a country go into lockdown school closure now forced national holiday closed cafes shops shopping malls grounded fs corona cronacation	Negative Coping		venting of emotions	-0.2	0.15	0.088	0.098	0.814	-0.0772	0	0	0	0	929	4966	4464	9	17	1
777	777	1.23779e+18	2020-03-11	The fact that I won’t be able to go see my family (🇦🇺) until the coronavirus issue is resolved is so depressing, flights all are canceled until god knows when, and Kuwait officially on lockdown 💔 #COVID19 #كورونا_الكويت	Jaber Al Ahmad City	𝔽𝟞𝕠𝕞.𝕃𝟛𝕟𝕫𝕚 🦋🤍	| BA Linguistics 🎓 | | MA Tesol 🎓| | PhD Pending 📖 | Kuwaiti - Australian 🇰🇼 🇦🇺 |	the fact that i wont be able to go see my family australia until the coronavirus issue is resolved is so depressing fs all are canceled until god knows when and kuwait officially on lockdown broken heart covid	Negative Coping		avoidance	-0.16667	0.641667	0.17	0.128	0.702	0.2516	0	0	1	0	323	5	13047	0	17	1
776	776	1.23781e+18	2020-03-11	I wonder what Corona (the 90s Band) are doing now. https://t.co/Yzd92Rrl0X	Al Surra	Nasser AlQatami 🇰🇼	🇰🇼 Kuwait 🇺🇳 @UN Worker 👨🏽‍💻 @UNCDF 🗺 98 Countries 🎓 Master’s IR 🎧 @LOFT965 ✈️ @Flight965 ⚖ #HumanRights 👩‍🎤 #WomenInMusic 🎼 Playlist Guru	i wonder what corona the s band are doing now	Positive Coping	mindfullness practices		0	0	0	0	1	0	0	0	0	0	4954	1585	61407	110	18	0
775	775	1.23782e+18	2020-03-11	pandemic 😊 https://t.co/fIE9SgO2Qp	Abu Ftaira	Bedoor 🔮	Hail Hydra | Marketing | ♊️ | 🌻 | 🐝	pandemic smiling face with smiling eyes	Positive Coping	mindfullness practices		0	0	0.6	0	0.4	0.7184	0	0	0	0	243	169	88444	9	19	0
774	774	1.23783e+18	2020-03-11	While lines are going out to the street, and people panicking like it's World War Three, I'm just gonna avoid the #coughing frenzy, while I click to #order my food 'n grocery #delivery! 🙃😉😏 #kuwait #Corona #CoronaOutbreak @Talabat @TryCarriage @Grubhub @UberEats #COVID19 https://t.co/5gjbWHJGsT	Kuwait	Adel A Abrahim	Father, Husband, Brother, Son, Friend, Lawyer and Investor... A little bit of everything—through #poetry... #news #law #investing #life #love	while lines are going out to the street and people panicking like its world war three im just gonna avoid the coughing frenzy while i click to order my food n grocery delivery upsidedown face winking face smirking face kuwait corona coronaoutbreak covid	Positive Coping	engaging in relaxation techniques		0	0	0.048	0.218	0.734	-0.8316	0	2	2	0	42	242	192	3	19	0
773	773	1.23783e+18	2020-03-11	everyone freaking out because of corona virus meanwhile Kuwaitis make memes 😂♥️ https://t.co/oLh8wb1Wo3	Salwa	SQ ⁶⁶⁶	we’re all mad here 🎩 | snapchat: iamsalmanq	everyone freaking out because of corona virus meanwhile kuwaitis make memes face with tears of joy heart suit	Positive Coping	engaging in relaxation techniques		0.8	0.2	0.3	0.176	0.524	0.6486	0	1	4	0	1568	1199	11229	1	19	0
778	778	1.23779e+18	2020-03-11	Can’t believe kuwait is actually on emergency lockdown! #COVID19 #فيروس_كورونا #كرونا_في_الكويت	Jaber Al Ahmad City	𝔽𝟞𝕠𝕞.𝕃𝟛𝕟𝕫𝕚 🦋🤍	| BA Linguistics 🎓 | | MA Tesol 🎓| | PhD Pending 📖 | Kuwaiti - Australian 🇰🇼 🇦🇺 |	cant believe kuwait is actually on emergency lockdown covid	Negative Coping		wishful thinking	0	0.1	0	0.245	0.755	-0.3818	0	1	0	0	323	5	13047	0	17	1
780	780	1.23779e+18	2020-03-11	All coffee shops, restaurants, shopping malls, gyms and clubs will be closed from tomorrow. due to corona virus in kuwait.😐	Al Egaila	Kamal Gaddi کمال غازی	لا إله إلا الله محمد رسول الله जिस दौर में जीना मुश्किल हो उस दौर में जीना लाजमी है 👉fight for your rights. Else die.....	all coffee shops restaurants shopping malls gyms and clubs will be closed from tomorrow due to corona virus in kuwait neutral face	Negative Coping		venting of emotions	-0.1125	0.2375	0	0	1	0	0	0	1	0	1377	1432	902	0	17	1
791	791	1.23769e+18	2020-03-11	Notifying you of any patient suspected of being infected in Corona is protecting you and those around you	Al Qurain	Qarameesh		notifying you of any patient suspected of being infected in corona is protecting you and those around you	Positive Coping	positive reframing		0	0	0	0.242	0.758	-0.6249	0	0	0	1	235	242	11706	1	10	0
782	782	1.23779e+18	2020-03-11	The effect of COVID-19 virus on contractual obligations. https://t.co/x06uDSKdZM	The Capital	Arkan Legal Consultants	A platform for the publication of legal updates in Kuwait. Arkan Legal Consultants @ArkanLaw- Contact us through Info@ArkanLaw.com.	the effect of covid virus on contractual obligations	Positive Coping	mindfullness practices		0	0	0	0	1	0	14	1	7	2	1146	1	364	7	17	0
781	781	1.23779e+18	2020-03-11	Stay clean, minimize close interactions with other people, avoid sick people and you’ll be fine #الحجر_المنزلي_واجب_وطني	Al Jabriyah	Ninar ☀️🌙نينار	Searching..	stay clean minimize close interactions with other people avoid sick people and youll be fine	Positive Coping	positive reframing		-0.01399	0.608036	0.214	0.262	0.524	-0.25	0	0	0	0	405	469	7656	3	17	0
794	794	1.23767e+18	2020-03-11	To all my kuwaiti friends, colleagues &amp; followers 🇰🇼 . Despite #corona virus breaking news 📺Italians are good ppl 😅 .. And don’t forget the facts that #italiansdoitbetter, the tag #madeinitaly &amp; Pizza 🍕… https://t.co/XZvLj7QPkW	Al Rai	Dr. Samer Tabban	Passionate Italian Orthodontist from #Treviso, Born in #Montebelluna, Practicing between Italy & Kuwait, Traveller, Ex-Basketball Player, Father of 3 girls	to all my kuwaiti friends colleagues amp followers kuwait despite corona virus breaking news television italians are good ppl grinning face with sweat and dont forget the facts that italiansdoitbetter the tag madeinitaly amp pizza pizza	Positive Coping	positive reframing		0.7	0.6	0.241	0	0.759	0.8468	0	0	0	0	1753	121	4524	10	9	0
793	793	1.23767e+18	2020-03-11	To all my kuwaiti friends, colleagues &amp; followers 🇰🇼 . Despite #corona virus breaking news 📺 Italians are good ppl 😅 .. And don’t forget the facts that #italiansdoitbetter, the tag #madeinitaly &amp; Pizza 🍕 😂🤣 . Tag your best italian friend 😁 https://t.co/C7c1y2ts9N	The Forum - The Avenues	Dr. Samer Tabban	Passionate Italian Orthodontist from #Treviso, Born in #Montebelluna, Practicing between Italy & Kuwait, Traveller, Ex-Basketball Player, Father of 3 girls	to all my kuwaiti friends colleagues amp followers kuwait despite corona virus breaking news television italians are good ppl grinning face with sweat and dont forget the facts that italiansdoitbetter the tag madeinitaly amp pizza pizza face with tears of joy rolling on the floor laughing tag your best italian friend beaming face with smiling eyes	Positive Coping	positive reframing		0.625	0.275	0.365	0.025	0.61	0.9768	0	0	0	1	1753	121	4524	10	9	0
792	792	1.23769e+18	2020-03-11	Spread love not corona !	Al Ahmady City	farah		spread love not corona	Positive Coping	positive reframing		0.5	0.6	0.583	0	0.417	0.6369	0	0	0	0	359	227	22384	4	10	0
790	790	1.2377e+18	2020-03-11	Some factors that would help you stay stronger during #crisis are being able to make decisions quickly and having a well-tested crisis plan in place. @Bananamediaco #bananamedia #kuwait #الكويت #business #GraphicDesign #Webdesign #architecture #branding #Logo #كورونا_الكويت https://t.co/bdg94QvPx2	Kuwait City	Banana Media Co.	#Design, #branding, #media, #production, #events & more. #bananamediaco "We take it so you don’t go Bananas!"	some factors that would help you stay stronger during crisis are being able to make decisions quickly and having a welltested crisis plan in place bananamedia kuwait business graphicdesign webdesign architecture branding logo	Positive Coping	problem-solving		0.416667	0.5625	0.125	0.193	0.682	-0.5994	1	0	2	0	664	16	965	0	11	0
789	789	1.23771e+18	2020-03-11	Forcing 1000s of people to gather in one hall can be disastrous in this #coronavirus epidemic This is at the time when gatherings are prohibited in #kuwait https://t.co/BtZliPx3Ht	Al Mirqab	Waqas Mansoor	Critical-thinker.Explorer. Sports lover. We are living in best of times!	forcing s of people to gather in one hall can be disastrous in this coronavirus epidemic this is at the time when gatherings are prohibited in kuwait	Negative Coping		avoidance	-0.7	0.8	0	0.13	0.87	-0.5994	0	0	0	2	244	340	3832	0	11	1
788	788	1.23772e+18	2020-03-11	What is worse the Corona or the viral news?! Humans have been through a lot though out history and they still persevered. To me, the one noticeable difference TODAY is what you are… https://t.co/kKBfTQp4xO	Al Surra	Dr. Muhamed A. Haider	“My country is the world, my home is Kuwait & my religion is to do good”	what is worse the corona or the viral news humans have been through a lot though out history and they still persevered to me the one noticeable difference today is what you are	Positive Coping	positive reframing		-0.4	0.6	0	0.088	0.912	-0.4767	0	0	0	0	1243	930	8490	8	12	0
795	795	1.23759e+18	2020-03-11	You would think only rarer commodities will be is short supply ever. behold #FaceMask #sanitizers #gloves are now leading the race .you never know whats is next!! #socks #deodrants 🤔 #Corona	Al Sharq	اسامه بن عيسي بن سلطان الذوادي	Businessman, engineer, loves physics and philosophy, recently politics and human affairs. equilibrium will eventually be achieved..	you would think only rarer commodities will be is short supply ever behold facemask sanitizers gloves are now leading the race you never know whats is next socks deodrants thinking face corona	Negative Coping		venting of emotions	0	0.433333	0	0	1	0	0	0	1	1	435	516	3993	5	3	1
786	786	1.23776e+18	2020-03-11	Please send this 👴🏼 some #pasta 🙏🏻💙 🇮🇹 😄 #Corona #كورونا https://t.co/yzWiZr4q2D	The Capital	Manayirr الغريِّب	أحبُّ الله عن أدب وصدق' اللهم ارحم واغفر لأبي وأمي♥️ #العوازم #المساحمة MA TESOL & MA Applied Linguistics @SussexUni PhD CAND Linguistics @SussexDocschool	please send this old man some pasta folded hands blue heart italy grinning face with smiling eyes corona	Positive Coping	mindfullness practices		0.166667	0.333333	0.375	0	0.625	0.9001	0	0	5	0	1795	608	30035	8	15	0
785	785	1.23776e+18	2020-03-11	Good thing schools are out in #Kuwait, Otherwise we could have another #treadwell at our gates! @KUWAIT_MOH #school #Corona #CoronavirusOutbreak #كرونا_في_الكويت Viral Corona Virus United States Video - " We all Gon Die!" Viral United... https://t.co/AdoKjAIrZX via @YouTube https://t.co/G29baT6y0f	Kuwait	Adel A Abrahim	Father, Husband, Brother, Son, Friend, Lawyer and Investor... A little bit of everything—through #poetry... #news #law #investing #life #love	good thing schools are out in kuwait otherwise we could have another treadwell at our gates school corona coronavirusoutbreak viral corona virus united states video we all gon die viral united via	Positive Coping	mindfullness practices		0.7	0.6	0.21	0.097	0.693	0.5574	0	0	1	0	42	242	192	3	15	0
784	784	1.23776e+18	2020-03-11	this causes me more stress and panic than covid-19 https://t.co/trOpaK6AE9	Al Jabriyah	Sarah		this causes me more stress and panic than covid	Negative Coping		venting of emotions	0.5	0.5	0	0.487	0.513	-0.7688	1	0	0	0	317	173	18807	3	15	1
783	783	1.23779e+18	2020-03-11	@joannezinkdunn @AlexInAir @lookner Why racist? We’re not kicking people out, in fact Kuwait offers treatment and healthcare to all those affected in it regardless of country, race, and religion. We have 72 imported cases. We’re on lock down to avoid the spread of a virus currently labeled a pandemic by WHO.	Al Shuwaikh Industrial	Sarah Bouyabes 🎄	✨I enjoy randomness. My mind's a mess, but i know where everything goes in it... I know what you did last summar	why racist were not kicking people out in fact kuwait offers treatment and healthcare to all those affected in it regardless of country race and religion we have imported cases were on lock down to avoid the spread of a virus currently labeled a pandemic by who	Positive Coping	mindfullness practices		-0.01852	0.22963	0	0.151	0.849	-0.7783	0	1	3	0	402	704	13222	3	17	0
787	787	1.23773e+18	2020-03-11	Ian just ended #Corona https://t.co/BbK6PVcV6Z	Salwa	𝓗	𝐂𝐮𝐭 𝐦𝐞 𝐚𝐧𝐝 𝐈 𝐛𝐥𝐞𝐞𝐝 𝐃𝐢𝐨𝐫.🧚🏻‍♀️🎨	ian just ended corona	Positive Coping	mindfullness practices		0	0	0	0	1	0	0	1	1	0	117	88	1629	0	13	0
770	770	1.23814e+18	2020-03-12	@KwBloodBank @KUWAIT_MOH @moh_media @pr_moh_kw Please share the details in English as well.	Al Mahboula	Bdkq8official		please share the details in english as well	Positive Coping	seeking social support		0	0	0.569	0	0.431	0.6808	0	1	0	0	80	74	1312	0	16	0
771	771	1.23812e+18	2020-03-12	Well a media fuelled hysteria has really help some management realise that meetings can be emails #education #Covid_19 #digitalclassrooms	Al Mahboula	stephen ralph	Welcome to 'The Hunt' - WildCatPoker is out in force, ask me how to jump into tier 1? 🏆 WPTWOC PLO8 champ🏆 Bearded, tattooed Irish hunter of betting discs!!	well a media fuelled hysteria has really help some management realise that meetings can be emails education covid digitalclassrooms	Positive Coping	positive reframing		0.2	0.2	0.212	0.121	0.667	0.2944	0	0	0	0	929	4966	4464	9	15	0
772	772	1.23811e+18	2020-03-12	MANILA, Philippines — President Rodrigo Duterte has approved the imposition of a “community quarantine” in the entire Metro Manila as the government scrambles to contain the spread of the 2019 coronavirus disease (COVID-19) in the country.	Al Mahboula	edison valencia	28| di gwapo, chubby, mabait.🌈🇵🇭🇰🇼	manila philippines president rodrigo duterte has approved the imposition of a community quarantine in the entire metro manila as the government scrambles to contain the spread of the coronavirus disease covid in the country	Negative Coping		venting of emotions	0	0.625	0.078	0	0.922	0.4215	0	1	0	0	15	409	602	0	14	1
232	232	1.238e+18	2020-03-12	I think Tedros Adhanom, head of the World Health Organization, said in his statement in the penultimate press conference that the Corona virus is transmissible compared to influenza. People show very few symptoms, so the possibility of an outbreak among these people will become difficult. tcoy lhuqfwwa	Al Mahboula	د. محمد أبل MB BCh KBCViro #antiCOVID19	إختصاصي أمراض ڤيروسية - JA Aʀᴍᴇᴅ Fᴏʀᴄᴇs Hᴏsᴘɪᴛᴀʟ 🇰🇼 -- الممثل القانوني @salman_adel87	think tedros adhanom head world health organization said statement penultimate press conference corona virus transmissible compared influenza people show symptoms possibility outbreak among people become difficult	Positive Coping	positive reframing		-0.38	0.565	0	0.052	0.948	-0.3612	1	1	2	0	16053	770	4934	39	7	0
231	231	1.23821e+18	2020-03-12	I mean, he won't let him sit and have fun. If you decide, tell me tco zqsahx tl	Al Mahboula	abdulaziz almouli	ارسنالي .... ❤️ Arsenal @arsenal	mean let sit fun decide tell	Positive Coping	mindfullness practices		-0.00625	0.44375	0.163	0	0.837	0.5106	0	1	1	0	335	372	7453	0	21	0
757	757	1.23848e+18	2020-03-13	With national lockdown I've just entered the final boss level on netflix.... @JayInbetweener1 netflix completed it #Covid_19 #SocialDistance #Netflix #completeditmate	Al Mahboula	stephen ralph	Welcome to 'The Hunt' - WildCatPoker is out in force, ask me how to jump into tier 1? 🏆 WPTWOC PLO8 champ🏆 Bearded, tattooed Irish hunter of betting discs!!	with national lockdown ive just entered the final boss level on netflix netflix completed it covid socialdistance netflix completeditmate	Positive Coping	engaging in relaxation techniques		0	1	0	0	1	0	1	0	2	0	929	4966	4464	9	15	0
769	769	1.23841e+18	2020-03-13	I’m so proud that I’m part of this amazing country❤️🇰🇼 There’s no place that’s willing to do this much for its citizens, so please just go get tested, it’s your responsibility too to keep everyone safe❤️ #kuwait #coronavirus #الكويت_تحارب_كورونا https://t.co/QTbbxi1ito	Ashbeliah	Fai Al-H🇰🇼	Simply another dreamer but hopefully a one of a kind achiever ☆ Some day a motivational speaker ☆ Positive vibes all the way♡ Physical therapist	im so proud that im part of this amazing country red heart kuwait theres no place thats willing to do this much for its citizens so please just go get tested its your responsibility too to keep everyone safe red heart kuwait coronavirus	Positive Coping	mindfullness practices		0.335714	0.478571	0.367	0.036	0.596	0.9682	4	0	11	0	381	249	29708	4	10	0
767	767	1.23843e+18	2020-03-13	@MALOOKA_49 @KUWAIT_MOH Would prefer to see the circular published in English by MoH like the others as thats the official source. We are all trying very hard to comply but daily changes are very difficult when scheduling a workforce.	Al Salmiyah	Lloyd Parker	Retired #EMS Chief #Paramedic, Husband, Father of 2 Amazing Young Women, Very amateur golfer.	would prefer to see the circular published in english by moh like the others as thats the official source we are all trying very hard to comply but daily changes are very difficult when scheduling a workforce	Positive Coping	seeking social support		-0.25729	0.426042	0.043	0.123	0.834	-0.5083	0	0	1	0	1370	4723	6850	29	11	0
766	766	1.23843e+18	2020-03-13	Is being horny a symptom of Corona?	Al Adailiya	Mohammed Al-Hottie	Dynamite with a laser beam	is being horny a symptom of corona	Positive Coping	mindfullness practices		0	0	0	0	1	0	0	1	0	0	273	621	18570	4	11	0
765	765	1.23843e+18	2020-03-13	@KwBloodBank @KUWAIT_MOH @moh_media @pr_moh_kw Thank you so much	Al Mahboula	Bdkq8official		thank you so much	Positive Coping	mindfullness practices		0.2	0.2	0.455	0	0.545	0.3612	0	0	1	0	80	74	1312	0	11	0
764	764	1.23843e+18	2020-03-13	Hi friends God bless you all guys from pandemic Corona.virus https://t.co/CUPjAkbib3	Al Mansouriyah	Dr. kazem marafie	اااه يا خوفى من🪱🦟🐞🪲🐜🕷🪳📍	hi friends god bless you all guys from pandemic coronavirus	Positive Coping	mindfullness practices		0	0	0.533	0	0.467	0.7906	1	0	2	0	4025	2244	117372	35	11	0
763	763	1.23844e+18	2020-03-13	Please stay home #coronavirus #Covid_19 https://t.co/RA9lyQBmIz	جليعه'٢٤٥|julai'a245	abdulaziz i abdulhadi ⚖️	‏🍁الدين شاهين مِن صاده قِنَصْ بَه🍁والمتطرّفُ خَصْمي حتى يعتَدِل، والمعتدلُ صاحبي حتى يتَطرّف🍁 i am discontinue	please stay home coronavirus covid	Positive Coping	problem-solving		0	0	0.365	0	0.635	0.3182	1	0	0	0	395	303	3933	1	12	0
762	762	1.23844e+18	2020-03-13	reminiscing on the past when touching outdoor items did not require sanitizing my life away #coronavirus	Salwa	SQ ⁶⁶⁶	we’re all mad here 🎩 | snapchat: iamsalmanq	reminiscing on the past when touching outdoor items did not require sanitizing my life away coronavirus	Negative Coping		wishful thinking	0.125	0.375	0	0	1	0	0	0	0	0	1568	1199	11229	1	12	1
761	761	1.23844e+18	2020-03-13	me praying for this Corona Virus shit to end cause AINT NOBODY GOT TIME FOR DAT https://t.co/FoMwWUXxQN	Salwa	SQ ⁶⁶⁶	we’re all mad here 🎩 | snapchat: iamsalmanq	me praying for this corona virus shit to end cause aint nobody got time for dat	Negative Coping		wishful thinking	-0.2	0.8	0.124	0.179	0.697	-0.2732	0	0	1	0	1568	1199	11229	1	12	1
760	760	1.23844e+18	2020-03-13	me when my parents put me on house arrest #coronavirus https://t.co/xSq3xRZMMz	Salwa	SQ ⁶⁶⁶	we’re all mad here 🎩 | snapchat: iamsalmanq	me when my parents put me on house arrest coronavirus	Negative Coping		venting of emotions	-0.05	0	0	0.211	0.789	-0.34	0	0	1	0	1568	1199	11229	1	12	1
758	758	1.23847e+18	2020-03-13	#حظر_التجول I am so glad and grateful because we are living in the country that follow all the safety rules to protect it’s nation, thank God for living in kuwait. Hopefully, all these days over soon and our normal life return again. It is like a nightmare	Al Mansouriyah	Shaima Essa	“You Can If You Think You Can”, English Literature graduated 🎓. My passion is reading and literature📚. Multilingual (English, Arabic, Persian, Español)	i am so glad and grateful because we are living in the country that follow all the safety rules to protect its nation thank god for living in kuwait hopefully all these days over soon and our normal life return again it is like a nightmare	Positive Coping	mindfullness practices		0.325	0.825	0.37	0	0.63	0.9654	0	0	2	0	62	363	1453	1	14	0
768	768	1.23842e+18	2020-03-13	So proud ❤️🇰🇼 #الكويت_تحارب_كورونا #FIGHTINGCOVIDS19 #وزارة_الصحة https://t.co/JSfBmjHcws	Ashbeliah	Fai Al-H🇰🇼	Simply another dreamer but hopefully a one of a kind achiever ☆ Some day a motivational speaker ☆ Positive vibes all the way♡ Physical therapist	so proud red heart kuwait fightingcovids	Positive Coping	mindfullness practices		0.4	0.5	0.663	0	0.337	0.8341	0	1	6	0	381	249	29708	4	11	0
759	759	1.23846e+18	2020-03-13	@AcademicChatter Given the current climate (=pandemic), I think that's a wise strategy. 👌 Write on! 💪	Al Shuhada	Dr Basil Cahusac de Caux 🙋🏽‍♂️⛩🕌	🤵🏽🇬🇧🇰🇼The approachable assistant professor. Society & language. Postgraduate writing groups & wellbeing in academia. 👨‍👩‍👧 Father & spouse. He/his.	given the current climate pandemic i think thats a wise strategy ok hand write on flexed biceps	Positive Coping	positive reframing		0.4	0.6	0.378	0	0.622	0.8176	0	0	0	0	209	352	469	1	13	0
229	229	1.23841e+18	2020-03-13	Return to God, the Corona epidemic and others will go away, so the Abbasid Caliph Al-Muqtadi ordered God to return by renewing the command of good and forbidding evil and breaking the amusement machines, so the plague was removed and diseases and epidemics went away -- -- -- -- -- -- -- -- -- -- The Beginning and the End by Ibn Kathir	Al Mahboula	مفسر رؤيا تقي الدين ومستشار أسري ونفسي	هنا التفسير مختصر مجاني ومن يريد تفسير مفصل وواضح وسريع ومستعجل بسعر رمزي تفسيرنا مرتبط بالكتاب والسنه وفهم السلف هذا رابط الواتس https://t.co/Kmjovz30Jt	return god corona epidemic others go away abbasid caliph al-muqtadi ordered god return renewing command good forbidding evil breaking amusement machines plague removed diseases epidemics went away beginning end ibn kathir	Negative Coping		self-blame	-0.15	0.8	0.13	0.099	0.771	0.0772	0	0	0	0	2056	1	7291	2	10	1
230	230	1.23841e+18	2020-03-13	Return to God, the Corona epidemic and others will go away == In the year AH, diseases increased with fever and plague in Iraq, Hijaz, and the Levant, and wild beasts died, followed by the death of livestock, and a black wind arose, and trees fell and lightning struck, so the Abbasid Caliph, Al-Muqtada, ordered by the command of God	Al Mahboula	مفسر رؤيا تقي الدين ومستشار أسري ونفسي	هنا التفسير مختصر مجاني ومن يريد تفسير مفصل وواضح وسريع ومستعجل بسعر رمزي تفسيرنا مرتبط بالكتاب والسنه وفهم السلف هذا رابط الواتس https://t.co/Kmjovz30Jt	return god corona epidemic others go away year ah diseases increased fever plague iraq hijaz levant wild beasts died followed death livestock black wind arose trees fell ning struck abbasid caliph al-muqtada ordered command god	Negative Coping		self-blame	-0.03333	0.416667	0.09	0.136	0.774	-0.6369	0	0	0	0	2056	1	7291	2	10	1
751	751	1.23884e+18	2020-03-14	You just gotta love the Italians hahaha😂🇮🇹❤️ #prayforitaly #Covid_19 https://t.co/ChX8QrO0iV	Hitteen	Jumanah AlAli	Alumni’16🎓| Anything but predictable.	you just gotta love the italians hahaha face with tears of joy italy red heart prayforitaly covid	Positive Coping	positive reframing		0.375	0.3	0.532	0.064	0.404	0.9423	0	0	0	0	59	141	876	1	14	0
752	752	1.23883e+18	2020-03-14	Kuwait shutdown 💔🇰🇼 pray for everyone &amp; that we all somehow get through this #corona @ Kuwait City https://t.co/9U9f1Re0Zx	Al Qibla	Latifa Alsumait	يا مديم النعم ادم لي امي وابي Part time traveler 🌍🗺️ Colleen clover 🦄	kuwait shutdown broken heart kuwait pray for everyone amp that we all somehow get through this corona kuwait city	Positive Coping	positive reframing		-0.4	0.4	0.254	0.121	0.625	0.5267	0	0	0	0	219	428	75769	14	14	0
753	753	1.23883e+18	2020-03-14	I miss #running I really wanna go out for a run 🏃🏻‍♀️ I miss running in @Alshaheedpark #CoronaVirus #CoronaVirusKuwait	Al Qadisiyah	Anfal Issa Al Radwan 🇰🇼🇺🇸🇪🇸🎶	Marathon finisher. Camino De Santiago: Francés & Finisterre. Climbed Kilimanjaro & other mountains too	i miss running i really wanna go out for a run woman running i miss running in coronavirus coronaviruskuwait	Negative Coping		wishful thinking	0.3	0.45	0	0.138	0.862	-0.296	0	0	0	0	955	319	36536	7	14	1
754	754	1.23881e+18	2020-03-14	It so true we were hit with an exaggerated &amp; dramatic national call for curfew on that first evening, that might have sparked a public state of panic, but the heavy-handed measures Kuwait is taking to control the spread of Covid-19 is working 🙏🏼 #عشان_الكويت_خلوكم_في_البيت	Al Jabriyah	Ninar ☀️🌙نينار	Searching..	it so true we were hit with an exaggerated amp dramatic national call for curfew on that first evening that might have sparked a public state of panic but the heavyhanded measures kuwait is taking to control the spread of covid is working folded hands	Positive Coping	problem-solving		-0.06667	0.53	0.041	0.066	0.893	-0.0781	0	0	1	0	405	469	7656	3	12	0
755	755	1.23878e+18	2020-03-14	Corona alert in photos too.. careful 😜 be cautious than ever .. https://t.co/Zbu4880Fnp	Abu Halifa	iSPR	Philocalist, Engineer, Photography Learner, Music, “Thalaivar”, missing my home town badly..Want to be a god to god and make him as me. ***Love conquers all***	corona alert in photos too careful winking face with tongue be cautious than ever	Positive Coping	engaging in relaxation techniques		-0.1	1	0.235	0.086	0.679	0.34	1	1	4	0	726	1618	11735	2	10	0
756	756	1.23876e+18	2020-03-14	We can beat #CoronaVirus https://t.co/4Erlmax6h9	Al Sharq	د. محمد نبيل الصفي	سوبر إنسان وطبيب أسنان. أمنيتي، أن يقال عني رجل مفيد. عيادة كلنيكا 🇰🇼 68888313 سناب: abdoty	we can beat coronavirus	Positive Coping	positive reframing		0	0	0	0	1	0	16	6	138	1	210043	175	87232	301	9	0
746	746	1.23911e+18	2020-03-15	@abdulghaphor You and home quarantine 😂 https://t.co/Q4Mcile6L6	Abdullah Al Mubarak - West Jleeb	Youseff Al-Sadi (₿丰)	ALSADI TECHNOLOGIES .. #Bitcoin	you and home quarantine face with tears of joy	Positive Coping	mindfullness practices		0.8	0.2	0.299	0.15	0.551	0.4404	0	0	0	0	454	175	24839	16	8	0
747	747	1.2391e+18	2020-03-15	These 2 weeks of #Quarantine is a great opportunity to learn some long term organization skills. This 14 day guide is a roadmap that will help you edit and organize your home from rooms, fridge, handbags, and iphone. Read More here👇 https://t.co/QfKBFkQBRc…	Hitteen	Sarah Faisal Alturki	LLM in International Law @UoELawSchool• Specialized in int’l investments, WTO, and arbitration |ماجستير قانون دولي متخصصة بقانون الاقتصاد الدولي	these weeks of quarantine is a great opportunity to learn some long term organization skills this day guide is a roadmap that will help you edit and organize your home from rooms fridge handbags and iphone read more here backhand index pointing down	Positive Coping	problem-solving		0.273611	0.484722	0.194	0	0.806	0.8625	0	0	0	1	426	365	5571	5	7	0
227	227	1.2391e+18	2020-03-15	khalil_aleesa A ban for everyone is mandatory	Al Mahboula	ابونايف	س بطول العشرة ، إنما تُقاس بجميل الأثر وجميل الأخلاق..فكم من معرفة قصيرة المدى بجمالها وهدوئها أعمق وأنقى من أطول معرفة ...	khalil_aleesa ban everyone mandatory	Positive Coping	seeking social support		0	0	0.131	0.364	0.505	-0.5106	0	0	0	0	89	127	8677	0	8	0
228	228	1.23907e+18	2020-03-15	t_rawanal alawadhikhaled moinformation moi_kuw kuwaiticm kuwait_moh May Allah reward you well	Al Mahboula	ابونايف	س بطول العشرة ، إنما تُقاس بجميل الأثر وجميل الأخلاق..فكم من معرفة قصيرة المدى بجمالها وهدوئها أعمق وأنقى من أطول معرفة ...	t_rawanal alawadhikhaled moinformation moi_kuw kuwaiticm kuwait_moh may allah reward well	Positive Coping	mindfullness practices		0	0	0.392	0	0.608	0.7003	0	0	0	0	89	127	8677	0	6	0
741	741	1.23934e+18	2020-03-15	What corona virus is doing to the world is really scary..	Hawalli	Raghad 🇵🇸🌻🍯	Clinical Dietitian at Kuwait Cancer Control Center || MSc student at KU|| Goal Digger || 🇵🇸🇯🇴	what corona virus is doing to the world is really scary	Negative Coping		venting of emotions	-0.5	1	0	0.259	0.741	-0.5413	1	0	1	0	2139	739	36731	5	23	1
748	748	1.23909e+18	2020-03-15	Gusto ko I-lockdown ung kuwarto ko kasama ka. I wanna Quarantine myself in your arms @KikoIpapo 😍😍😍 I love you kiko💯❤️💗 https://t.co/Jajw54rpOb	Al Riqai	مارك ليجاسي		gusto ko ilockdown ung kuwarto ko kasama ka i wanna quarantine myself in your arms i love you kiko hundred points red heart growing heart	Negative Coping		wishful thinking	0.25	0.3	0.405	0	0.595	0.936	1	1	10	0	156	599	5042	0	7	1
742	742	1.23922e+18	2020-03-15	The corona virus crisis will pass, but life may never be "normal" again. #corona https://t.co/yO5fFFwlJy	Sabah Al Salem	Ali Al-Abdullah	Prosthodontist🦷 ♓️ Traveller✈️ Man United Fan🔴 Smile Creator😁	the corona virus crisis will pass but life may never be normal again corona	Negative Coping		venting of emotions	0.15	0.65	0	0.164	0.836	-0.3716	0	0	0	0	1085	627	10211	0	15	1
750	750	1.23906e+18	2020-03-15	I just noticed that I lost nearly 20 followers bc I’m not that active but it’s ok,my love for Fumi will never ever change. I’m busy for a while bec hosp. duty is so exhausting due to this Covid-19. Anyway,I’ll try to be more active for a while. I miss you @fumfumfum3	Al Mahboula	A_SOLID FUMI ❤️	| Registered Nurse 👩🏼‍⚕️ | Roman Catholic ✝️ | OFW |📍Kuwait |	i just noticed that i lost nearly followers bc im not that active but its okmy love for fumi will never ever change im busy for a while bec hosp duty is so exhausting due to this covid anywayill try to be more active for a while i miss you	Positive Coping	engaging in relaxation techniques		0.051042	0.484375	0.155	0.151	0.695	0.5021	2	5	38	0	550	506	5786	0	5	0
745	745	1.23912e+18	2020-03-15	#Coronaindia These men wives are in quarantine!! 🤭🤭🤭 #CoronaVirusUpdates https://t.co/43cmBui6Lf	Mina Abdulla	iSPR	Philocalist, Engineer, Photography Learner, Music, “Thalaivar”, missing my home town badly..Want to be a god to god and make him as me. ***Love conquers all***	coronaindia these men wives are in quarantine face with hand over mouth face with hand over mouth face with hand over mouth coronavirusupdates	Positive Coping	mindfullness practices		0	0	0.324	0	0.676	0.8625	0	0	0	0	726	1618	11735	2	9	0
744	744	1.23921e+18	2020-03-15	#فعاليات_الحجر_المنزلي i dont even have a PLAN https://t.co/9xJfPeaXue	Hitteen	Sarah.	Aries.	i dont even have a plan	Negative Coping		avoidance	0	0	0	0	1	0	57	1	139	9	200	149	2508	1	15	1
743	743	1.23922e+18	2020-03-15	#فعاليات_الحجر_المنزلي 👩‍🍳👩‍🍳 Banana Bread French Toast from: https://t.co/jt7rAakYBP instagram page👏 https://t.co/LUzwtB3riU	Sabah Al Ahmad Marine City - Loloat Al Khairan	Sarah Faisal Alturki	LLM in International Law @UoELawSchool• Specialized in int’l investments, WTO, and arbitration |ماجستير قانون دولي متخصصة بقانون الاقتصاد الدولي	woman cook woman cook banana bread french toast from instagram page clapping hands	Positive Coping	engaging in relaxation techniques		0	0	0	0	1	0	0	0	0	0	426	365	5571	5	15	0
749	749	1.23909e+18	2020-03-15	First live teaching session complete on Zoom! Only had 3 children but it was so lovely to see their faces! Currently on week 3 of online teaching due to Coronavirus, and it's safe to say I miss my babies 😭 #elearning #reception	Al Mahboula	Miss Lara🌸	22🥳 3rd year of teaching Reception in Kuwait🇰🇼 NQT mentor 21/22 Studied at @BAPrimaryUSW 2016 - 2019	first live teaching session complete on zoom only had children but it was so lovely to see their faces currently on week of online teaching due to coronavirus and its safe to say i miss my babies loudly crying face elearning reception	Positive Coping	positive reframing		0.12904	0.539815	0.195	0.111	0.695	0.7649	0	0	1	0	277	229	107	2	7	0
740	740	1.23935e+18	2020-03-16	Alhamdulilah for islam .. no fighting over tissue paper cuz we know how to clean the proper way😃 #coronavirus #COVIDー19	Al Rehab	بن بدر	رَبِّ إِنِّي لِمَا أَنْزَلْتَ إِلَيَّ مِنْ خَيْرٍ فَقِيرٌ .. just a sinner in this dunya 🌍	alhamdulilah for islam no fighting over tissue paper cuz we know how to clean the proper way grinning face with big eyes coronavirus covid	Positive Coping	problem-solving		0.122222	0.3	0.258	0	0.742	0.7438	0	0	0	0	603	1897	13622	3	0	0
739	739	1.23945e+18	2020-03-16	Do you want to move from “worry” to the “action” mood for Italy? The Kuwait Italian Business Council launched a flash donation campaign for Protezione Civile. I kindly invite you to donate. Just a click away. Thanks! https://t.co/dNBRBxC89N https://t.co/xgB0p09KLH	Hitteen	MARIA ANGELA CAPELLO	Passionate about Sustainability. Fan of noble causes. Promoter of Resilience and Women in Energy. Cavaliere OSI. Also a pianist.	do you want to move from worry to the action mood for italy the kuwait italian business council launched a flash donation campaign for protezione civile i kindly invite you to donate just a click away thanks	Positive Coping	engaging in relaxation techniques		0.225	0.3	0.236	0.065	0.698	0.6808	1	0	1	0	2187	2625	17582	91	7	0
225	225	1.23967e+18	2020-03-16	el_deesha yasin ah I speak well, the best for you, Dr. Fifi Abdo, Egypt, the official sponsor, Corona. Say, “May God heal us all,” and don’t say politeness.	Al Mahboula	ۛ ּاســمــر ⁦🇸🇩⁩		el_deesha yasin ah speak well best you dr fifi abdo egypt official sponsor corona say may god heal us all don’t say politeness	Negative Coping		denial	1	0.3	0.251	0	0.749	0.8126	0	1	1	0	33	107	764	0	22	1
226	226	1.23943e+18	2020-03-16	The best way to avoid contracting the Corona infection is to treat it as if it is infected. You also assume that you are infected. You want to transmit the infection. It is a bit harsh. Unfortunately, it is best for God to remove the plight from us.	Al Mahboula	AH M ED NESIM	praise be to allah who guided us to islam and in no way could we have been guided unless allah has guided us	best way avoid contracting corona infection treat infected also assume infected want transmit infection bit harsh unfortunately best god remove p us	Positive Coping	problem-solving		0.6	0.433333	0.218	0.209	0.572	0.1531	0	0	0	0	227	4237	9184	0	6	0
224	224	1.23997e+18	2020-03-17	Very positive initiatives. May God heal you all. Corona tco jhji fj f	Al Mahboula	كامنجا Kamanja	‏‏لا إله إلا أنت سبحانك إني كنت من الظالمين... مصري حر ولا انتمي لأي جهه سياسيه فقط نبحث عن طريق الحق أينما كان	positive initiatives may god heal all corona	Positive Coping	positive reframing		0.295455	0.709091	0.353	0	0.647	0.7178	0	0	1	0	527	1427	4432	0	17	0
222	222	1.24032e+18	2020-03-18	mal nzix_ I couldn't because Corona played a joy and joy in us	Al Mahboula	ALTAMIMI	Leave me alone, I am sad and heartbroken	mal nzix_ corona played joy joy us	Positive Coping	mindfullness practices		0.8	0.2	0.387	0.104	0.509	0.7625	0	0	0	0	1887	1726	77290	0	16	0
223	223	1.24028e+18	2020-03-18	People are working hard for your comfort, your internal health, the municipal health, others who are on the front line in the face of the epidemic, they return to work to stay home so they can sleep and rest. They are not sitting back watching its people sacrifice because of this monastery. Follow the orders regarding the Corona_in_Kuwait instructions.	Al Mahboula	super.salem		people working hard comfort internal health municipal health others front line face epidemic return work stay home sleep rest sitting back watching people sacrifice monastery follow orders regarding corona_in_kuwait instructions	Positive Coping	positive reframing		-0.09722	0.180556	0.041	0.023	0.936	0.2732	1	0	1	0	683	307	44574	2	14	0
221	221	1.24058e+18	2020-03-19	The whole world is at a standstill because of the Corona virus, of course, as you know, there is only one thing that is working, which is the increase in the population of the whole world, and this is due to the stay at home coronavirus 🦠🦠 mask	Al Mahboula	Ahmad Eid ✈️		whole world standstill corona virus course know one thing working increase population whole world due stay home coronavirus mask	Positive Coping	mindfullness practices		0.06875	0.54375	0.046	0	0.954	0.3182	0	0	0	0	1126	481	3925	0	9	0
219	219	1.24103e+18	2020-03-20	Don't think about saying hello to someone these two days crying. Mandatory_curfew_that_save_us tcophygdo ish	Al Mahboula	MoHaMeD 😘(AhlAwY) 😉	‏المنصوره شارع البحر وجزيره الورد ذكريات😉 ‏‏‏اهلاووووي😍 برشلوني 💖 ليفربولي دلوقتي عشان محمدصلاح💝 My principle, Always Expect The goodness you will find it	think saying hello someone two days crying mandatory_curfew_that_save_us	Positive Coping	problem-solving		-0.2	0.6	0	0.193	0.807	-0.4767	9	0	9	0	919	2391	2963	0	15	0
220	220	1.24093e+18	2020-03-20	Corona_New_Corona_Egypt They left the detainees Be_positive Oh God, Amen, Lord of the worlds tconocaanwi	Al Mahboula	كامنجا Kamanja	‏‏لا إله إلا أنت سبحانك إني كنت من الظالمين... مصري حر ولا انتمي لأي جهه سياسيه فقط نبحث عن طريق الحق أينما كان	corona_new_corona_egypt left detainees be_positive oh god amen lord worlds	Positive Coping	mindfullness practices		0	0	0.139	0	0.861	0.2732	0	0	0	0	527	1427	4432	0	9	0
737	737	1.24104e+18	2020-03-20	Thank you for wonderful message to spread awareness on measures that should be taken to be safe from novel Covid -19 🙏🙏😍😍😍🔝🔝🔝🔝🔝 You are Sooo Charming we love you @iamsrk 👑❤❤❤❤ #WarAgainstVirus #SocialDistanacing #Covid_19 #coronavirus #Shahrukhkhan #Bollywood https://t.co/bcZWiwUyFx	The Capital	Rawiah Ismael	Graduated from Rajiv Gandhi univ India, jaihind [I hate politics I respect all religions ] #Ayurveda #innovation #Bollywood #SRKian #kindness #Realmadrid #Me💌	thank you for wonderful message to spread awareness on measures that should be taken to be safe from novel covid folded hands folded hands smiling face with hearteyes smiling face with hearteyes smiling face with hearteyes top arrow top arrow top arrow top arrow top arrow you are so charming we love you crown red heart red heart red heart red heart waragainstvirus socialdistanacing covid coronavi…	Positive Coping	mindfullness practices		0.4	0.430769	0.526	0	0.474	0.9947	0	0	0	0	1021	3355	15517	35	16	0
738	738	1.24104e+18	2020-03-20	Very proud of how the Ministry of Health is approaching the Covid-19 situation. Even after all those years of people blaming our medical system accusing it of incompetence and unable to handle crisis situations. Hope they appreciate it now! #KuwaitMOH	Al Salam	Dr. Faisal Borahmah	﷽ Internal Medicine Resident - UBC 🩺	very proud of how the ministry of health is approaching the covid situation even after all those years of people blaming our medical system accusing it of incompetence and unable to handle crisis situations hope they appreciate it now kuwaitmoh	Positive Coping	mindfullness practices		0.125	0.375	0.166	0.227	0.608	-0.5118	4	1	4	1	997	511	29868	10	16	0
216	216	1.24138e+18	2020-03-21	Oh God, make the days pass by, they hurt, they give, they take, they rejoice, they grieve, the Most Merciful of the Merciful, Corona	Al Mahboula	سالم مسلّم سالم جعيدان الجعيدان		oh god make days pass by hurt give take rejoice grieve merciful merciful corona	Positive Coping	mindfullness practices		0.5	0.5	0.161	0.194	0.645	-0.25	0	0	0	0	2382	1294	22839	5	15	0
214	214	1.24143e+18	2020-03-21	A notebook is sitting crying, why do you have a ruler? Do you know my brother, Corona is serious? We want to make him laugh. His sneezing face is rolling on the floor from laughter.	Al Mahboula	M.AlعMeri	EaT+Gym+Games+SleeP = Happy Life ‹☻›	notebook sitting crying ruler know brother corona serious want make laugh sneezing face rolling floor laughter	Positive Coping	mindfullness practices		-0.07778	0.455556	0.197	0.103	0.7	0.6199	0	0	0	0	139	136	51624	0	18	0
213	213	1.24146e+18	2020-03-21	The day we say thank you to the heroes of Kuwait in all fields who are struggling to spread the disease. Those who are staying at home help them. Stay_at_home. We are proud_of_you. Kuwait_is_fighting_Corona.	Al Mahboula	abdulaziz almouli	ارسنالي .... ❤️ Arsenal @arsenal	day say thank heroes kuwait fields struggling spread disease staying home help them stay_at_home proud_of_you kuwait_is_fighting_corona	Positive Coping	mindfullness practices		0	0	0.206	0.068	0.726	0.6908	1	1	1	0	335	372	7453	0	20	0
212	212	1.24147e+18	2020-03-21	Oh God, the curfew	Al Mahboula	🎀ZYOoON🎀♍️	البايو مو اليوم باااااجر	oh god curfew	Positive Coping	problem-solving		0	0	0.412	0	0.588	0.2732	0	0	0	0	210	494	3482	0	20	0
211	211	1.24147e+18	2020-03-21	Partial ban, come on	Al Mahboula	🎀ZYOoON🎀♍️	البايو مو اليوم باااااجر	partial ban come	Positive Coping	positive reframing		-0.1	0.3	0	0.545	0.455	-0.5574	0	0	0	0	210	494	3482	0	20	0
217	217	1.24133e+18	2020-03-21	For the curfew curfew Kuwait, people still care about the danger tcojc xpopq l	Al Mahboula	AH M ED NESIM	praise be to allah who guided us to islam and in no way could we have been guided unless allah has guided us	curfew curfew kuwait people still care danger	Positive Coping	problem-solving		0	0	0.301	0.165	0.534	0.4215	0	0	0	0	227	4237	9184	0	11	0
218	218	1.24133e+18	2020-03-21	The sterilization of the streets in Egypt and the application of quarantine have begun. The army has descended on the streets of Cairo. Ammar Misr. Thank you to the great Egyptian army. The video is of Salah Salem Street in Cairo. Enter it safely and securely. tcol lhbnvdel	Al Mahboula	Eng/sherif 66022905	مهندس قوي وآلات كهربيه وعضو بجمعية المهندسين الكويتيه ومدرس متخصص بالعلوم الهندسيه.	sterilization streets egypt application quarantine begun army descended streets cairo ammar misr thank great egyptian army video salah salem street cairo enter safely securely	Positive Coping	mindfullness practices		0.566667	0.616667	0.217	0	0.783	0.9042	1	0	1	0	237	159	575	1	11	0
215	215	1.24138e+18	2020-03-21	We are all committed to the Ministry of Health’s decision to temporarily stop work, otherwise there will be further notice, private health institutions, emergency departments, and I urge my colleagues to adhere to this decision. Corona Corona_Kuwait Corona_in_Kuwait	Al Mahboula	د احمد لافي المطيري	‏استشاري أمراض جلديه وتناسليه وليزر مستشفي الاحمدي /لونج لايف كلينيك	committed ministry health decision temporarily stop work otherwise notice private health institutions emergency departments urge colleagues adhere decision corona corona_kuwait corona_in_kuwait	Positive Coping	problem-solving		0	0.4375	0.05	0.115	0.835	-0.4019	0	0	0	0	921	43	1708	6	15	0
736	736	1.24143e+18	2020-03-21	@narendramodi We support public curfew for the country pm..sir	Al Mahboula	Alam	alam	we support public curfew for the country pmsir	Positive Coping	positive reframing		0	0.066667	0.278	0	0.722	0.4019	0	0	0	0	13	60	98	0	18	0
735	735	1.24148e+18	2020-03-21	https://t.co/pGcVdUOha3 At the age of only 9 years, working hard to teach about corona virus to her fellow children with the simplest words. @ntvkenya @citizentvkenya @K24Tv @StateHouseKenya @CyrusOguna @Jefkoinangefans @BettyMKyallo @ebraheemhababi https://t.co/RnrSFaVHF8	Al Mahboula	Barista Bernado Antonio	Barista Artist & Coffee Dose Expert Specialist in Kuwait City Grand Avenues Mall @ Q Coffee bar & Queens Restaurant.( https://t.co/3ldDmIbifI )	the age of only years working hard to teach about corona virus to her fellow children with the simplest words	Positive Coping	mindfullness practices		-0.14583	0.770833	0	0.069	0.931	-0.1027	0	0	0	0	14	14	203	0	21	0
208	208	1.24179e+18	2020-03-22	Pray for you, there is no delivery to curfew_restaurants_in_Kuwait	Al Mahboula	F.ج.S	حبك الباين على وجهي محليني ❤️👨‍👩‍👧‍👧	pray you delivery curfew_restaurants_in_kuwait	Negative Coping		avoidance	0	0	0.2	0.191	0.609	0.0258	0	0	1	0	1449	222	31847	8	17	1
209	209	1.2417e+18	2020-03-22	Imagine that you are asked to stay at home and be clean. I expect it is not a difficult request. We must adhere to the worm and bug of Corona_in_Kuwait. Stay_in_your_homes.	Al Mahboula	abdulaziz almouli	ارسنالي .... ❤️ Arsenal @arsenal	imagine asked stay home clean expect difficult request must adhere worm bug corona_in_kuwait stay_in_your_homes	Positive Coping	mindfullness practices		0.308333	0.85	0.142	0	0.858	0.5873	1	0	1	0	335	372	7453	0	12	0
210	210	1.24156e+18	2020-03-22	He wears a mask for lunch, why do they eat coronavirus?	Al Mahboula	🚒Hashem🇰🇼	افْعَلُوا الخيرَ ولا تحقِرُوا منهُ شيْئاً !	wears mask lunch eat coronavirus	Positive Coping	mindfullness practices		0	0	0	0	1	0	0	0	0	0	210	182	9631	1	3	0
207	207	1.24191e+18	2020-03-23	Guys, say that there is a partial ban, if you have something necessary, why do you go out to the world?	Al Mahboula	🎀ZYOoON🎀♍️	البايو مو اليوم باااااجر	guys say partial ban something necessary go world	Negative Coping		self-blame	-0.05	0.65	0	0.153	0.847	-0.5574	0	0	0	0	210	494	3482	0	1	1
731	731	1.24223e+18	2020-03-23	Stay safe. This too will pass. #stayhome #safe #coronavirus #covıd19 #gymscanner #healthy #kuwait #gym #missingyou @ Al Mahboula 2, Al Mahboula https://t.co/WIKm5C9cH1	Al Mahboula	Gymscanner.com	الموقع الاول في العالم لعمل اشتراكات مع النوادي الرياضية في بلدك بأسعار تنافسية First global platform for gyms and fitness centers to sell memberships online	stay safe this too will pass stayhome safe coronavirus covd gymscanner healthy kuwait gym missingyou al mahboula al mahboula	Positive Coping	positive reframing		0.5	0.5	0.347	0	0.653	0.8176	0	0	0	0	49	0	167	0	23	0
732	732	1.24213e+18	2020-03-23	At kuwait..... Go corona go https://t.co/bECOP1hFQp	Al Mahboula	Dinesh Kumar		at kuwait go corona go	Negative Coping		wishful thinking	0	0	0	0	1	0	0	1	1	0	10	123	28	0	17	1
733	733	1.24209e+18	2020-03-23	5 pm curfew in affect. Sun still shining and the streets are empty. #ghosttown #kuwait #nofilter #covid_19 #curfew #day2 #prayingfortheworld @ Al Mahboula 2, Al Mahboula https://t.co/tPybgI6kVb	Al Mahboula	Faron		pm curfew in affect sun still shining and the streets are empty ghosttown kuwait nofilter covid curfew day prayingfortheworld al mahboula al mahboula	Positive Coping	mindfullness practices		-0.1	0.5	0	0.076	0.924	-0.2023	0	0	1	0	385	1043	3126	6	14	0
734	734	1.24196e+18	2020-03-23	It’s been a while. Please stay positive, maharrrrs especially in this difficult time of pandemic virus, Solid maharrrrs, right? Take care always and love each other. Peace everyone. Missing you @fumfumfum3 #FumiyaSankai	Al Mahboula	A_SOLID FUMI ❤️	| Registered Nurse 👩🏼‍⚕️ | Roman Catholic ✝️ | OFW |📍Kuwait |	its been a while please stay positive mahars especially in this difficult time of pandemic virus solid mahars right take care always and love each other peace everyone missing you fumiyasankai	Positive Coping	mindfullness practices		0.023498	0.525771	0.393	0.115	0.491	0.9185	3	2	19	0	550	506	5786	0	5	0
205	205	1.24213e+18	2020-03-23	Arrivals during the curfew in Kuwait, dinner time tcoqaaxzucsw via YouTube	Al Mahboula	Islam khattab🏹 🇦🇹🇪🇬🇰🇼	Mechanical Engineer @ Kuwait 🇦🇹🇪🇬🇰🇼Egyptian Zamalekawy 💪✌️#Zamalek	arrivals curfew kuwait dinner time tcoqaaxzucsw via youtube	Positive Coping	mindfullness practices		0	0	0	0	1	0	0	1	0	0	133	710	1689	0	17	0
206	206	1.24191e+18	2020-03-23	I mean, we're giving you a ban, why is it so late in the morning? You're going out and sitting and watching something. Responsible?	Al Mahboula	🎀ZYOoON🎀♍️	البايو مو اليوم باااااجر	mean we're giving ban late morning going sitting watching something responsible	Negative Coping		avoidance	-0.1375	0.6125	0.171	0.121	0.708	0.1179	0	0	0	0	210	494	3482	0	2	1
203	203	1.24259e+18	2020-03-24	The dreaded Corona disease penetrated my immunity and my health condition deteriorated. My state put me in quarantine and blocked my phone and my contact with you was cut off. Perhaps I will return and perhaps I will die, so forgive me for my mistakes and I pray for mercy. Perhaps it will ease my death throes and light up the darkness of my grave.	Al Mahboula	MoHaMeD 😘(AhlAwY) 😉	‏المنصوره شارع البحر وجزيره الورد ذكريات😉 ‏‏‏اهلاووووي😍 برشلوني 💖 ليفربولي دلوقتي عشان محمدصلاح💝 My principle, Always Expect The goodness you will find it	dreaded corona disease penetrated immunity health condition deteriorated state put quarantine blocked phone contact cut off perhaps return perhaps die forgive mistakes pray mercy perhaps ease death throes ness grave	Negative Coping		avoidance	0.4	0.7	0.117	0.266	0.617	-0.9146	1	2	4	0	919	2391	2963	0	23	1
204	204	1.24248e+18	2020-03-24	The ban for men. Expressions. Expressions. Someone covering the face with the hand 🏼‍ ♂️ Especially when you are alone and living alone. Kuwait_Corona_Curfew tcootwnbzrpxb	Al Mahboula	M7MD 🦅	Egyptian in Kuwait🇪🇬🇰🇼... Barca 💙❤️ Al AHLY ❤️..(gym &⚽️) the air I breath.. 🤷🏻‍♂️	ban men expressions expressions someone covering face hand especially alone living alone kuwait_corona_curfew	Negative Coping		avoidance	0	1	0.092	0.218	0.69	-0.5267	0	0	1	0	301	632	4052	0	15	1
730	730	1.24258e+18	2020-03-24	We can only emerge victorious together. Stay at Home for 21 days starting midnight today! Let’s unite to fight coronavirus because all our lives are at stake. Also, essential commodities are/will be available so don’t panic! Stay Home. Stay Safe. https://t.co/5m5YZMPLTm	Al Mahboula	sandeep sandhu	Sandeep sandhu	we can only emerge victorious together stay at home for days starting midnight today lets unite to fight coronavirus because all our lives are at stake also essential commodities arewill be available so dont panic stay home stay safe	Positive Coping	positive reframing		0.18	0.46	0.132	0.058	0.809	0.5074	0	0	1	0	17	68	315	0	22	0
729	729	1.24285e+18	2020-03-25	*The DJ Fatish* Published on 25 March 2020 Watch this short video from *Abdulai Tamba Sesay* A Graphics Designer and photographer from Sierra Leone as he join the rest of the world in fighting COVID-19 https://t.co/eBOBjZNteZ	Al Mahboula	Djfatish	Kuwait based DJ TV Presenter and M C Sierra Leonean Now booking fatishbaby8555@gmail.com	the dj fatish published on march watch this short video from abdulai tamba sesay a graphics designer and photographer from sierra leone as he join the rest of the world in fighting covid	Positive Coping	positive reframing		0	0.3	0.062	0.07	0.868	-0.0772	0	0	0	0	13	28	13	0	16	0
202	202	1.24321e+18	2020-03-26	Badriya_Talaba_I miss arresting_a_girl_because_of_Corona. What do you think? Kamal_Al-Din, the respectable girl who spoke her opinion and was arrested. The conference became a tray of Corona with minced meat. Wake up, may God have mercy on you. tcohzpzzvjufk	Al Mahboula	كامنجا Kamanja	‏‏لا إله إلا أنت سبحانك إني كنت من الظالمين... مصري حر ولا انتمي لأي جهه سياسيه فقط نبحث عن طريق الحق أينما كان	badriya_talaba_i miss arresting_a_girl_because_of_corona think kamal_al-din respectable girl spoke opinion arrested conference became tray corona minced meat wake up may god mercy you	Negative Coping		venting of emotions	0.5	0.5	0.17	0.106	0.724	0.4215	0	0	2	0	527	1427	4432	0	15	1
201	201	1.24322e+18	2020-03-26	Girl_arrested_due_to_Corona Badriya_Talaba_The new_Corona uttered about the power of God, the Most High, the Great, may God heal them and protect them and protect all Muslim countries tco yp cpwc r	Al Mahboula	كامنجا Kamanja	‏‏لا إله إلا أنت سبحانك إني كنت من الظالمين... مصري حر ولا انتمي لأي جهه سياسيه فقط نبحث عن طريق الحق أينما كان	girl_arrested_due_to_corona badriya_talaba_the new_corona uttered power god high great may god heal protect protect muslim countries	Negative Coping		venting of emotions	0.486667	0.596667	0.355	0	0.645	0.9147	0	0	1	0	527	1427	4432	0	16	1
199	199	1.24359e+18	2020-03-27	We will live our anguish in the spring as if we had tasted the bitterness of yesterday. Coronavirus_quarantine_virus	Al Mahboula	محمد بدران🇰🇼🇵🇸	‏‏‏‏‏‏‏فلسطيني من فلسطين والباقي في CV	live anguish spring tasted bitterness yesterday coronavirus_quarantine_virus	Positive Coping	positive reframing		0.136364	0.5	0	0.292	0.708	-0.765	0	0	0	0	335	62	10167	0	17	0
200	200	1.24335e+18	2020-03-27	A global crisis, an epidemic, treatment for the sick, deaths, closed borders, flight suspension, a strategic stock of food. Mandarin continues with us, and a sick group emerges that wants fancy food dressing. The second asks for a porter’s right to his funeral, and a genetic mutation appears among them, and the earth says, “The earth is a peel of the mother of the sauce.” aoukw tcofrsctjmvyb	Al Mahboula	نون	إِذا المَرءُ لا يَرعاكَ إِلّا تَكَلُّفاً فَدَعهُ وَلا تُكثِر عَلَيهِ التَأَسُّفا 🇬🇧🇰🇼👩🏻‍🎓♎️	global crisis epidemic treatment sick deaths closed borders f suspension strategic stock food mandarin continues us sick group emerges wants fancy food dressing second asks porter right funeral genetic mutation appears among them earth says the earth peel mother sauce	Negative Coping		venting of emotions	-0.14898	0.35	0	0.173	0.827	-0.9217	0	0	1	0	226	190	2686	0	1	1
197	197	1.2439e+18	2020-03-28	The World Health Organization, a report by the American CNN network, Egypt records the highest rate of recovery from the Corona epidemic in the world. Be proud of your country tcohlfs wem	Al Mahboula	بكر الغندور	مستشار قانوني ⚖️ أبحث عن الحق # ولا انحني لكي التقط الأشياء التي سقطت مني 🌹وكم كفيف بصير الفؤاد ❤️ وما الدنيا بباقية لحي ..ولا حي علي الدنيا بباق	world health organization report american cnn network egypt records highest rate recovery corona epidemic world proud country	Positive Coping	positive reframing		0.4	0.5	0.091	0	0.909	0.4767	0	0	0	0	184	598	417	0	14	0
728	728	1.24401e+18	2020-03-28	She is only 9 years and teaching kenyans on corona virus https://t.co/pGcVdUOha3 @ebraheemhababi #mulikacorona @LillianMuli #NTVWeekendEdition #Covid_19 #ktnpointblank #KenyaVsSouthAfrica #Barista #StayAtHomeAndStaySafe #StayAtHome #CurfewKenya #coffeelovers https://t.co/pVULCvdUAQ	Al Mahboula	Barista Bernado Antonio	Barista Artist & Coffee Dose Expert Specialist in Kuwait City Grand Avenues Mall @ Q Coffee bar & Queens Restaurant.( https://t.co/3ldDmIbifI )	she is only years and teaching kenyans on corona virus mulikacorona ntvweekendedition covid ktnpointblank kenyavssouthafrica barista stayathomeandstaysafe stayathome curfewkenya coffeelovers	Positive Coping	positive reframing		0	1	0	0	1	0	0	0	2	1	14	14	203	0	21	0
198	198	1.24376e+18	2020-03-28	I seek refuge in God with prolonged wishing and deprivation of arrival. Oh God, I seek refuge in crowding followed by regret, words driven by anger, rushing feelings and lack of resourcefulness. Oh God, strength has destroyed us in life. Oh God, happiness fills the heart, security embraces the soul, and joy is taken into account. Home quarantine, total ban, staying at home tcok bct vxkr	Al Mahboula	نون	إِذا المَرءُ لا يَرعاكَ إِلّا تَكَلُّفاً فَدَعهُ وَلا تُكثِر عَلَيهِ التَأَسُّفا 🇬🇧🇰🇼👩🏻‍🎓♎️	seek refuge god prolonged wishing deprivation arrival oh god seek refuge crowding followed regret words driven anger rushing feelings lack resourcefulness oh god strength destroyed us life oh god happiness fills heart security embraces soul joy taken account home quarantine total ban staying home	Positive Coping	mindfullness practices		0.2	0.3375	0.286	0.194	0.52	0.7787	0	0	0	0	226	190	2686	0	4	0
196	196	1.24423e+18	2020-03-29	Corona has arrived in Mahboula, a person covering the face with his hand 🏼‍ ♂️ Corona is very close, protect us, O Lord, and pardon us and keep the evil away from us. Palms even together. One modified emoji. I promise this crisis will be better.	Al Mahboula	M7MD 🦅	Egyptian in Kuwait🇪🇬🇰🇼... Barca 💙❤️ Al AHLY ❤️..(gym &⚽️) the air I breath.. 🤷🏻‍♂️	corona arrived mahboula person covering face hand corona close protect us lord pardon us keep evil away us palms even together one modified emoji promise crisis better	Negative Coping		avoidance	-0.1	0.6	0.209	0.143	0.648	0.3189	0	3	5	0	301	632	4052	0	12	1
195	195	1.2443e+18	2020-03-29	drbaselalsabah His Excellency the Minister, the large number of cases of contact and under epidemiological investigation. We the people demand the imposition of a total curfew in order to control the situation. I am with you, God willing, trust in God and we are with you tcotm y emaa	Al Mahboula	🎀ZYOoON🎀♍️	البايو مو اليوم باااااجر	drbaselalsabah excellency minister large number cases contact epidemiological investigation people demand imposition total curfew order control situation you god willing trust god tcotm emaa	Negative Coping		avoidance	0.154762	0.642857	0.217	0.026	0.757	0.8689	0	0	0	0	210	494	3482	0	16	1
194	194	1.24463e+18	2020-03-30	Dr. Heba Mostafa, the pride of Egyptians, and her role in developing the Corona vaccine tcorm hdahawc via YouTube	Al Mahboula	Eng/sherif 66022905	مهندس قوي وآلات كهربيه وعضو بجمعية المهندسين الكويتيه ومدرس متخصص بالعلوم الهندسيه.	dr heba mostafa pride egyptians role developing corona vaccine tcorm hdahawc via youtube	Positive Coping	mindfullness practices		0	0	0.118	0	0.882	0.34	0	0	0	0	237	159	575	1	14	0
193	193	1.24488e+18	2020-03-31	cgckuwait drbaselalsabah anasalsaleh Regional ban in Kuwait regions, not excluding another region. The epidemic divides the regions. Then people go to the areas that have been banned and go and stay at home in the area that does not have a ban. The epidemic spreads because they crowd in the families’ homes.	Al Mahboula	🎀ZYOoON🎀♍️	البايو مو اليوم باااااجر	cgckuwait drbaselalsabah anasalsaleh regional ban kuwait regions excluding another region epidemic divides regions people go areas banned go stay home area ban epidemic spreads crowd familie homes	Negative Coping		avoidance	0	0	0.05	0.113	0.837	-0.5684	0	0	0	0	210	494	3482	0	6	1
192	192	1.24488e+18	2020-03-31	cgckuwait anasalsaleh drbaselalsabah A regional ban, the formation of medical teams for each region, and an examination and swab for the virus. The most appropriate solution is to examine the entire population, not far from us. We, the honorable citizens and residents, take the population census with you. You go to a building’s house, do the swab, and take the data.	Al Mahboula	🎀ZYOoON🎀♍️	البايو مو اليوم باااااجر	cgckuwait anasalsaleh drbaselalsabah regional ban formation medical teams region examination swab virus appropriate solution examine entire population far us we honorable citizens residents take population census you go building house swab take data	Negative Coping		avoidance	0.19	0.525	0.09	0.053	0.857	0.3566	0	0	0	0	210	494	3482	0	6	1
191	191	1.24505e+18	2020-03-31	Corona_New_Corona_Egypt Corona They left_the_detainees_Corona_inside_the_prisons Arresting_a_girl_because_of_Corona The problem They are entrusted to solve the problem of the homeland themselves The problem is Jalal Amer	Al Mahboula	كامنجا Kamanja	‏‏لا إله إلا أنت سبحانك إني كنت من الظالمين... مصري حر ولا انتمي لأي جهه سياسيه فقط نبحث عن طريق الحق أينما كان	corona_new_corona_egypt corona left_the_detainees_corona_inside_the_prisons arresting_a_girl_because_of_corona problem entrusted solve problem homeland problem jalal amer	Negative Coping		denial	0	0	0.121	0.273	0.606	-0.6705	0	0	0	0	527	1427	4432	0	18	1
727	727	1.24497e+18	2020-03-31	Sierra Leone has registered its first case of the coronavirus. President Julius Maada Bio says he’s a 37-year-old man who came to the country with Air Brussels on 16 March. He’d been in isolation.	Al Mahboula	Djfatish	Kuwait based DJ TV Presenter and M C Sierra Leonean Now booking fatishbaby8555@gmail.com	sierra leone has registered its first case of the coronavirus president julius maada bio says hes a yearold man who came to the country with air brussels on march hed been in isolation	Negative Coping		venting of emotions	0.25	0.333333	0	0.078	0.922	-0.4019	0	0	1	0	13	28	13	0	12	1
190	190	1.24514e+18	2020-04-01	alyaarakha It is assumed that the second week is that any cases coming from abroad and anyone who has been in contact with them until no longer appear. Any new cases will be those who have been in contact with abroad, and after that the third week will be the epidemiological investigation phase, except for any cases that appear, they do not know where they came from. That is why we are institutin…	Al Mahboula	Ahmed Saeed		alyaarakha assumed second week cases coming abroad anyone contact longer appear new cases contact abroad third week epidemiological investigation phase except cases appear know came from instituting lockdown cases appear investigation	Positive Coping	problem-solving		0.045455	0.151515	0	0.052	0.948	-0.5267	0	0	0	0	80	2877	102	0	0	0
189	189	1.24544e+18	2020-04-01	I know the word, we have a means, and it can turn a stone into the hand of a defenseless man, the horse of a fugitive man, the spear of a knight’s hand, the light of my blind eyes, let down oblivion, dust, and rust. Ghassan Kanafani	Al Mahboula	M7MD 🦅	Egyptian in Kuwait🇪🇬🇰🇼... Barca 💙❤️ Al AHLY ❤️..(gym &⚽️) the air I breath.. 🤷🏻‍♂️	know word means turn s hand defenseless man horse fugitive man spear knight hand blind eyes let oblivion dust rust ghassan kanafani	Negative Coping		avoidance	-0.16389	0.613889	0.117	0.094	0.789	0.3182	0	0	2	0	301	632	4052	0	19	1
188	188	1.24595e+18	2020-04-03	kuwait_moh Peace be upon you. If masculinity and chivalry have a title, then its title became Sheikh Basil Al-Sabah, Minister of Health, due to his normal efforts in the current era, may God protect Kuwait and its people.	Al Mahboula	Samir ElNajar		kuwait_moh peace upon you masculinity chivalry title title became sheikh basil al-sabah minister health due normal efforts current era may god protect kuwait people	Positive Coping	mindfullness practices		0.008333	0.475	0.19	0	0.81	0.802	0	0	0	0	137	992	186	0	5	0
187	187	1.24614e+18	2020-04-03	drbaselalsabah kuwaiticm anasalsaleh kalroudan Minister of Affairs The proposal is to block my areas and examine citizens and residents who live in the affected areas and those who have cases to be treated. At the same time, we see that violators of the residency law are deported. I mean, on both sides, we benefit.	Al Mahboula	🎀ZYOoON🎀♍️	البايو مو اليوم باااااجر	drbaselalsabah kuwaiticm anasalsaleh kalroudan minister affairs proposal block areas examine citizens residents live affected areas cases treated time see violators residency law deported mean sides benefit	Positive Coping	problem-solving		-0.05871	0.4375	0.05	0.123	0.828	-0.5267	0	0	0	0	210	494	3482	0	18	0
186	186	1.24619e+18	2020-04-03	kuwait_moh Respected Doctor Basil Al-Sabah, may God Almighty protect you for the respectable effort you made for the sake of the respected Kuwaiti people and expatriates	Al Mahboula	Samir ElNajar		kuwait_moh respected doctor basil al-sabah may god almighty protect respectable effort made sake respected kuwaiti people expatriates	Positive Coping	mindfullness practices		0.5	0.5	0.397	0	0.603	0.9153	0	0	1	0	137	992	186	0	21	0
185	185	1.24644e+18	2020-04-04	The whole world is facing the virus, Egypt is facing the Corona virus and the Muslim Brotherhood, so the battle is more severe, dangerous and dirtier	Al Mahboula	بكر الغندور	مستشار قانوني ⚖️ أبحث عن الحق # ولا انحني لكي التقط الأشياء التي سقطت مني 🌹وكم كفيف بصير الفؤاد ❤️ وما الدنيا بباقية لحي ..ولا حي علي الدنيا بباق	whole world facing virus egypt facing corona virus muslim brotherhood battle severe dangerous dirtier	Negative Coping		denial	0.033333	0.6	0	0.344	0.656	-0.8898	0	0	0	0	184	598	417	0	14	1
184	184	1.24644e+18	2020-04-04	The great_powers_appear_in_time_of_crisis President_Abdel Fattah_Sisi The countries of the world are crying out for the exception of the Corona virus, especially the great powers, they have crumbled and their papers have fallen, one leaf after another. Egypt, the country, is making effective contributions to its people at home and great aid abroad, oh mother, the world is great.	Al Mahboula	بكر الغندور	مستشار قانوني ⚖️ أبحث عن الحق # ولا انحني لكي التقط الأشياء التي سقطت مني 🌹وكم كفيف بصير الفؤاد ❤️ وما الدنيا بباقية لحي ..ولا حي علي الدنيا بباق	great_powers_appear_in_time_of_crisis president_abdel fattah_sisi countries world crying exception corona virus especially great powers crumbled papers fallen one leaf another egypt country making effective contributions people home great aid abroad oh mother world great	Negative Coping		avoidance	0.466667	0.775	0.217	0.077	0.706	0.9017	0	0	0	0	184	598	417	0	14	1
183	183	1.24662e+18	2020-04-05	Corona Turkey, the number of infected people is one thousand people, one person has died, and the Brotherhood channels that broadcast Turkey are still talking about Corona Egypt day and night	Al Mahboula	بكر الغندور	مستشار قانوني ⚖️ أبحث عن الحق # ولا انحني لكي التقط الأشياء التي سقطت مني 🌹وكم كفيف بصير الفؤاد ❤️ وما الدنيا بباقية لحي ..ولا حي علي الدنيا بباق	corona turkey number infected people one thousand people one person died brotherhood channels broadcast turkey still talking corona egypt day night	Negative Coping		denial	0	0	0.036	0.188	0.776	-0.7579	0	0	0	0	184	598	417	0	2	1
182	182	1.24786e+18	2020-04-08	Now I know why the Indian police are beating them. Why are the ban breakers coming out to understand the Hajj in Mahboula? We are completely quarantined. They go and walk and want to go out. The police caught them going to the security point in the morning. Workers and requests are coming. They want to go to work. Return them. Where can they understand this total quarantine?	Al Mahboula	🎀ZYOoON🎀♍️	البايو مو اليوم باااااجر	know indian police beating them ban breakers coming understand hajj mahboula completely quarantined go walk want go out police caught going security point morning workers requests coming want go work return them understand total quarantine	Negative Coping		denial	0.05	0.575	0.067	0.093	0.84	-0.6072	0	0	2	0	210	494	3482	0	12	1
726	726	1.2479e+18	2020-04-08	Kuwait Central Blood Bank started today, Wednesday, the process of collecting the immune plasma to confront the new coronavirus, who are recovering from the disease. 🇰🇼 😍 Thanks to the noble hearts 💕 #COVID19… https://t.co/QGx8x3G8z3	Al Mahboula	Bdkq8official		kuwait central blood bank started today wednesday the process of collecting the immune plasma to confront the new coronavirus who are recovering from the disease kuwait smiling face with hearteyes thanks to the noble hearts two hearts covid	Positive Coping	mindfullness practices		0.234091	0.451136	0.376	0.032	0.592	0.9584	1	0	1	0	80	74	1312	0	14	0
181	181	1.24804e+18	2020-04-09	You do not need any leader or interior official to visit you, I swear there is no ban on Kuwait to visit you and reassure you ❤️ ❤️ Abdul Mohsen Al-Ajmi_our pride	Al Mahboula	F.ج.S	حبك الباين على وجهي محليني ❤️👨‍👩‍👧‍👧	need leader interior official visit you swear ban kuwait visit reassure red heart abdul mohsen al-ajmi_our pride	Positive Coping	positive reframing		0	0	0.198	0.031	0.771	0.7596	2	0	1	0	1449	222	31847	8	0	0
180	180	1.24822e+18	2020-04-09	drshamael Peace be upon you, Doctor, sorry for the inconvenience. We have sterilization rooms, measuring devices, temperature recognition, and a facial recognition system tcowacql lyoc	Al Mahboula	بكر الغندور	مستشار قانوني ⚖️ أبحث عن الحق # ولا انحني لكي التقط الأشياء التي سقطت مني 🌹وكم كفيف بصير الفؤاد ❤️ وما الدنيا بباقية لحي ..ولا حي علي الدنيا بباق	drshamael peace upon you doctor sorry inconvenience sterilization rooms measuring devices temperature recognition facial recognition system	Positive Coping	positive reframing		-0.25	0.5	0.119	0.13	0.751	0.1779	0	0	0	0	184	598	417	0	11	0
179	179	1.2483e+18	2020-04-09	saidelzoka aakkzz Ha, I swear, Corona made me see talents that I had missed for a long time	Al Mahboula	محمد عبده	امضي ولا تقارن نفسك 🤭بأحد فتتأخر🤦🏼‍♂️ وتنشغل🤷🏼‍♂️	saidelzoka aakkzz ha swear corona made see talents missed long time	Positive Coping	mindfullness practices		-0.05	0.4	0.14	0.159	0.701	0.1531	0	0	0	0	11	80	32	0	17	0
725	725	1.24827e+18	2020-04-09	The stories we now encounter under the corona era https://t.co/5LMdsX5Usa	Al Mahboula	מחמוד אלנאש	Attorney Hussain Al Nahash & Associates Law Firm Manama	the stories we now encounter under the corona era	Positive Coping	mindfullness practices		0	0	0	0	1	0	0	0	0	0	316	571	17038	5	15	0
178	178	1.24842e+18	2020-04-10	Mohamed Al Abbar, the Emirati businessman and owner of the Emaar company, donated one million to Egypt to confront the effects of Corona, and this is not the first time. Last year, he previously donated one million to Egypt for development and social projects. Egypt. Long live, good businessmen. Long live, Emirati, lover of your second homeland. Pray tconn w xk oh.	Al Mahboula	بكر الغندور	مستشار قانوني ⚖️ أبحث عن الحق # ولا انحني لكي التقط الأشياء التي سقطت مني 🌹وكم كفيف بصير الفؤاد ❤️ وما الدنيا بباقية لحي ..ولا حي علي الدنيا بباق	mohamed al abbar emirati businessman owner emaar company donated one million egypt confront effects corona first time last year previously donated one million egypt development social projects egypt long live good businessmen long live emirati lover second homeland pray	Positive Coping	mindfullness practices		0.098939	0.303333	0.131	0.025	0.844	0.8074	0	0	0	0	184	598	417	0	1	0
177	177	1.24874e+18	2020-04-10	I was an ambulance driver in Egypt. I can volunteer with experience in the tenth region in particular and all regions of Kuwait. Years of experience during the comprehensive lockdown. Fazaa_Almthafin. Kuwait_fights_Corona. Al-Mahboula. Kuwait_Corona. Kuwait. Kuwait_fights_Corona. Kuwait_deserves it.	Al Mahboula	@q8shwrma.com	كرة القدم أخبار العالم	ambulance driver egypt volunteer experience tenth region particular regions kuwait years experience comprehensive lockdown fazaa_almthafin kuwait_fights_corona al-mahboula kuwait_corona kuwait kuwait_fights_corona kuwait_deserves it	Positive Coping	positive reframing		0.166667	0.333333	0.051	0	0.949	0.25	0	0	0	0	44	528	915	0	22	0
176	176	1.24896e+18	2020-04-11	Urgent: Qatar records a case of Corona. Tamim Al-Aar flees to a distant island tcouxkzllckvt	Al Mahboula	بكر الغندور	مستشار قانوني ⚖️ أبحث عن الحق # ولا انحني لكي التقط الأشياء التي سقطت مني 🌹وكم كفيف بصير الفؤاد ❤️ وما الدنيا بباقية لحي ..ولا حي علي الدنيا بباق	urgent qatar records case corona tamim al-aar flees distant island	Negative Coping		venting of emotions	-0.1	0.35	0.109	0.103	0.788	0.0258	0	0	1	0	184	598	417	0	12	1
175	175	1.24899e+18	2020-04-11	Medical equipment transports the body of an Indian expatriate who fell on the streets of Mahboula in preparation for examining it and confirming the causes of death. Curfew_Corona_Mahboula_Snapchat_Kuwait_News_Kuwait Urgent News_Kuwait_News Kuwait Warning tcoy f eg nx	Al Mahboula	Fgold_502_news	الشعب مصدر السلطه بلا حدود	medical equipment transports body indian expatriate fell streets mahboula preparation examining confirming causes death curfew_corona_mahboula_snapchat_kuwait_news_kuwait urgent news_kuwait_news kuwait warning	Negative Coping		venting of emotions	0	0	0.044	0.153	0.803	-0.6705	0	0	0	0	800	589	6148	1	14	1
174	174	1.24904e+18	2020-04-11	The group of citizens in Mahboula are able to go out. No, today my friends are going out. They said no one can go out. It is forbidden by the curfew_in_Kuwait.	Al Mahboula	F.ج.S	حبك الباين على وجهي محليني ❤️👨‍👩‍👧‍👧	group citizens mahboula able go out no today friends going out said one go out forbidden curfew_in_kuwait	Negative Coping		avoidance	0.5	0.625	0.086	0.139	0.776	-0.2263	0	0	0	0	1449	222	31847	8	18	1
173	173	1.24927e+18	2020-04-12	gazy ksa kuwait_moh The regions are supposed to be mentioned so that people take a ban on most regions	Al Mahboula	@q8shwrma.com	كرة القدم أخبار العالم	gazy ksa kuwait_moh regions supposed mentioned people take ban regions	Negative Coping		wishful thinking	0.5	0.5	0	0.167	0.833	-0.5574	0	0	0	0	44	528	915	0	9	1
172	172	1.24929e+18	2020-04-12	It is necessary to salute the time, for they are fighting for all of us. A salute of respect and appreciation to all the doctors and their assistants, the White_Army, Corona, Corona_Egypt tcox u pvsv y	Al Mahboula	كامنجا Kamanja	‏‏لا إله إلا أنت سبحانك إني كنت من الظالمين... مصري حر ولا انتمي لأي جهه سياسيه فقط نبحث عن طريق الحق أينما كان	necessary salute time fighting us salute respect appreciation doctors assistants white_army corona corona_egypt	Positive Coping	mindfullness practices		0	1	0.153	0.06	0.788	0.5994	1	0	2	0	527	1427	4432	0	10	0
171	171	1.2493e+18	2020-04-12	drbaselalsabah kuwaiticm anmas Your Excellency the Ministers, the topic is that the students who are evacuated will be in home quarantine, which is beneficial, and then some of them have elderly families and some of them have chronic diseases, and their brothers may be placed in institutional detention, because if the disease is transmitted, the right of their families and the most important of t…	Al Mahboula	🎀ZYOoON🎀♍️	البايو مو اليوم باااااجر	drbaselalsabah kuwaiticm anmas excellency ministers topic students evacuated home quarantine beneficial elderly families chronic diseases brothers may placed institutional detention disease transmitted right families important them elderly brothers suffer chronic diseases become disaster	Negative Coping		venting of emotions	0.395238	0.678571	0.092	0.109	0.799	-0.3832	0	0	0	0	210	494	3482	0	11	1
724	724	1.24982e+18	2020-04-13	@TonyRobbins Tony, good day. I would like to share this with you today. Due to the Corona virus craze, we expats working here in Kuwait are in a bad situation. The Kuwait government has locked down some areas of the state. On top of that , many businesses have been shut down.	Al Mahboula	Travis Roark (HillBilly)	KK4SDX HAM Radio, Lean Six Sigma Green Belt, Photography, Cooking, Coffee, Drones, Fishing, Hunting, Diving, Master Gunner, Retired Army Combat Veteran.	tony good day i would like to share this with you today due to the corona virus craze we expats working here in kuwait are in a bad situation the kuwait government has locked down some areas of the state on top of that many businesses have been shut down	Negative Coping		avoidance	0.080556	0.459921	0.161	0.087	0.752	0.5106	0	1	0	0	64	222	278	0	22	1
170	170	1.24973e+18	2020-04-13	Al-Hafiz Ibn Hajar, may God have mercy on him, said: The benefits of epidemics and plagues are shortening hope, improving work, alertness, heedlessness, and providing supplies for the journey.	Al Mahboula	بكر الغندور	مستشار قانوني ⚖️ أبحث عن الحق # ولا انحني لكي التقط الأشياء التي سقطت مني 🌹وكم كفيف بصير الفؤاد ❤️ وما الدنيا بباقية لحي ..ولا حي علي الدنيا بباق	al-hafiz ibn hajar may god mercy him said benefits epidemics plagues shortening hope improving work alertness heedlessness providing supplies journey	Negative Coping		self-blame	0	0	0.35	0	0.65	0.8979	0	0	0	0	184	598	417	0	16	1
723	723	1.25017e+18	2020-04-14	Religious hate is also a dangerous virus than Corona The dogs who are doing Hindu Muslims even during this epidemic Their treatment is very important	Al Mahboula	Arshad khan ارشد خان अरशद खाँन	if you are right...go left	religious hate is also a dangerous virus than corona the dogs who are doing hindu muslims even during this epidemic their treatment is very important	Positive Coping	mindfullness practices		-0.22	0.7625	0.068	0.22	0.712	-0.6915	0	1	0	0	151	873	369	0	21	0
169	169	1.25048e+18	2020-04-15	Peace be upon you. Thanks and appreciation to Uncle Fahd Al-Mailem who presented him to the country for providing Al-Shaab Al-Bahri Hotel as a quarantine. May God reward you with goodness, Abu Youssef, may God protect Kuwait.	Al Mahboula	Samir ElNajar		peace upon you thanks appreciation uncle fahd al-mailem presented country providing al-shaab al-bahri hotel quarantine may god reward goodness abu youssef may god protect kuwait	Positive Coping	mindfullness practices		0.2	0.2	0.444	0	0.556	0.969	1	0	7	1	137	992	186	0	17	0
722	722	1.25129e+18	2020-04-17	When it will finish the quarantine in maboula any idea thank q tweeter	Al Mahboula	Catalunia	Nothing impossible with god.	when it will finish the quarantine in maboula any idea thank q tweeter	Positive Coping	seeking social support		0	0	0.172	0	0.828	0.3612	0	0	0	0	151	345	1227	0	23	0
721	721	1.25166e+18	2020-04-18	Okay been in self isolation from the 8th March / national lockdown 15th March / and district restricted 11hr a day curfew since stay of April..... so as @GreenDay said wake me up when septemeber ends. #lockdown #cronacation #itsall1day	Al Mahboula	stephen ralph	Welcome to 'The Hunt' - WildCatPoker is out in force, ask me how to jump into tier 1? 🏆 WPTWOC PLO8 champ🏆 Bearded, tattooed Irish hunter of betting discs!!	okay been in self isolation from the th march national lockdown th march and district restricted hr a day curfew since stay of april so as said wake me up when septemeber ends lockdown cronacation itsallday	Positive Coping	mindfullness practices		0.5	0.5	0.047	0.132	0.821	-0.5267	0	0	0	0	929	4966	4464	9	23	0
719	719	1.25264e+18	2020-04-21	Even in the face of corona https://t.co/P7bKJqLsVZ	Al Mahboula	Oladapo Olayinka	Teacher | Seeking MSc opportunities in Voice Tech, Speech Recognition, Applied Linguistics, General Linguistics, Psycholinguistics, and Consumer behaviour	even in the face of corona	Positive Coping	positive reframing		0	0	0	0	1	0	0	0	0	0	419	2566	5335	1	16	0
720	720	1.25261e+18	2020-04-21	“I am now an #MBRUCommunityImmunity Ambassador. I am responsible to protect myself and my community from #COVID-19. I challenge (tag 3 friends/family) to take the course. https://t.co/3OogOE8Fig"	Al Mahboula	Thadz	If I were to give myself A single present It would be: Confidence	i am now an mbrucommunityimmunity ambassador i am responsible to protect myself and my community from covid i challenge tag friendsfamily to take the course	Positive Coping	positive reframing		0.2	0.55	0.22	0	0.78	0.6369	0	0	1	0	150	382	2875	5	14	0
718	718	1.253e+18	2020-04-22	May Allah grant Jannah to all those who have died due to Covid-19 Ameen	Al Mahboula	Mohammed Tarbej	Keep smiling, because life is a beautiful thing and there's so much to smile about....	may allah grant jannah to all those who have died due to covid ameen	Positive Coping	mindfullness practices		-0.125	0.375	0.138	0.199	0.663	-0.2732	0	0	0	0	1	87	27	0	16	0
717	717	1.25441e+18	2020-04-26	Today is the start of my 14days quarantine period. I’m now classified as PUM. I cannot go out even in the hallway and lobby of our building. I’m asymptomatic and feeling better but pls pray for me, maharrrrs. Keeping the faith with God is my only weapon. God bless 😊 @fumfumfum3	Al Mahboula	A_SOLID FUMI ❤️	| Registered Nurse 👩🏼‍⚕️ | Roman Catholic ✝️ | OFW |📍Kuwait |	today is the start of my days quarantine period im now classified as pum i cannot go out even in the hallway and lobby of our building im asymptomatic and feeling better but pls pray for me mahars keeping the faith with god is my only weapon god bless smiling face with smiling eyes	Positive Coping	seeking social support		0.25	0.75	0.396	0.038	0.566	0.9737	1	37	53	0	550	506	5786	0	14	0
716	716	1.25486e+18	2020-04-27	India To Emerge Stronger Post Pandemic COVID-19 https://t.co/E4p1WFIcyU via @Global Tribune A must read of this write of a geoscientist. An unique in depth reporting of facts and future of India	Al Mahboula	Pritish Mukherjee 🇮🇳🙏🏽	Professionally Petroleum Geologist, an Integrator, conceptual guidance, technology seeker, multi-disciplinarian- Indian 1st, proud nationalist, Chelsea fan	india to emerge stronger post pandemic covid via tribune a must read of this write of a geoscientist an unique in depth reporting of facts and future of india	Positive Coping	positive reframing		0.1875	0.5625	0.085	0	0.915	0.3818	0	0	0	0	133	286	1220	2	20	0
715	715	1.25581e+18	2020-04-30	Due to quarantine reasons I had to inform my classes I will only be telling inside jokes from no one. #education #dramateacher #dadjokes	Al Mahboula	stephen ralph	Welcome to 'The Hunt' - WildCatPoker is out in force, ask me how to jump into tier 1? 🏆 WPTWOC PLO8 champ🏆 Bearded, tattooed Irish hunter of betting discs!!	due to quarantine reasons i had to inform my classes i will only be telling inside jokes from no one education dramateacher dadjokes	Positive Coping	mindfullness practices		-0.0625	0.6875	0.079	0.087	0.833	-0.0516	0	0	1	0	929	4966	4464	9	10	0
714	714	1.257e+18	2020-05-03	Medical staff is starting to get affected. Please do not visit any medical facility unless you are in real need. You are the only one responsible for depleting the health care manpower. #covid19 #coronavirus… https://t.co/xs6yCcIufg	Al Mahboula	Mohamed ALkady	التوتر في بيئة العمل يؤدي إلى الأخطاء	medical staff is starting to get affected please do not visit any medical facility unless you are in real need you are the only one responsible for depleting the health care manpower covid coronavirus	Positive Coping	positive reframing		0.066667	0.325	0.198	0.041	0.761	0.7351	0	0	0	0	20	86	159	0	17	0
168	168	1.25729e+18	2020-05-04	May God increase your goodness. Your words are sweet. May God increase your goodness. Kuwait. May God increase your goodness. Kuwait. Kuwait. Al-Wakrah. Ministry of Health. Jabed Quarry. Lived Quarry. tcobgyt lipvn	Al Mahboula	@q8shwrma.com	كرة القدم أخبار العالم	may god increase goodness words sweet may god increase goodness kuwait may god increase goodness kuwait kuwait al-wakrah ministry health jabed quarry lived quarry	Positive Coping	mindfullness practices		0.35	0.65	0.534	0	0.466	0.969	0	1	0	0	44	528	915	0	13	0
167	167	1.25767e+18	2020-05-05	talalalyagout Private company workers We take the salary on the date of stopping our work, and with us are our families, and we are sitting on spending, and we have to ban Mahboula, thank God, the situation is so that we go down unless necessary, if the situation lasts longer than this, our money is running out of income, and the bank even gives us loans because its workers are small. The solutio…	Al Mahboula	@q8shwrma.com	كرة القدم أخبار العالم	talalalyagout private company workers take salary date stopping work us families sitting spending ban mahboula thank god situation go unless necessary situation lasts longer this money running income bank even gives us loans workers small solution thank you	Positive Coping	seeking social support		-0.10139	0.515972	0.112	0.062	0.825	0.4939	0	1	0	0	44	528	915	0	14	0
165	165	1.25772e+18	2020-05-05	Our meeting tomorrow with the distinguished Dr. Khaled Al-Qahs drkhaledalqahs Professor of Media and Public Relations at Kuwait University Our meeting entitled Rumors in the time of the new Corona crisis How to confront al mahboula al mahboula tcomwp hisekh	Al Mahboula	Hamza Taqi, MCIM	Passionate about people's capabilities and talents Hamza loves to grow people. An Engineer, Chartered Marketer & Business Consultant.	meeting tomorrow distinguished dr khaled al-qahs drkhaledalqahs professor media public relations kuwait university meeting entitled rumors time new corona crisis confront al mahboula	Positive Coping	engaging in relaxation techniques		0.068182	0.260606	0.047	0.129	0.824	-0.5719	0	0	0	0	1114	1476	8241	39	17	0
166	166	1.25771e+18	2020-05-05	meemojust mahamoh Ok, and how can a ban be imposed on the entire country when the situation is very bad for people to survive today, may God fix it	Al Mahboula	ۛ ּاســمــر ⁦🇸🇩⁩		meemojust mahamoh ok ban imposed entire country situation bad people survive today may god fix	Negative Coping		avoidance	-0.13667	0.663889	0.059	0.243	0.698	-0.7645	0	1	0	0	33	107	764	0	16	1
163	163	1.25811e+18	2020-05-06	If you wish, it's Sunday, and it's better than anything 🥺🥺 Total_lockdown	Al Mahboula	kauther.	انا ومن أحب بأمانة موسى بن جعغر❤️	wish sunday better anything total_lockdown	Positive Coping	mindfullness practices		0.5	0.5	0.301	0	0.699	0.6808	0	0	1	0	4896	49	26391	1	19	0
162	162	1.25814e+18	2020-05-06	Okay, these are insults to the Egyptians. I want to know what the Corona crisis is. Kuwait will send its children to Egypt. Corona, and I know that more people are coming to Egypt for tourism and education. I want an answer to stop the Egyptians’ visas.	Al Mahboula	محمد عبده	امضي ولا تقارن نفسك 🤭بأحد فتتأخر🤦🏼‍♂️ وتنشغل🤷🏼‍♂️	okay insults egyptians want know corona crisis is kuwait send children egypt corona know people coming egypt tourism education want answer stop egyptian visas	Negative Coping		venting of emotions	0.5	0.5	0.082	0.167	0.751	-0.765	0	1	1	0	11	80	32	0	20	1
713	713	1.25795e+18	2020-05-06	Looks like its sandstorm time in Kuwait....better get inside quick and stay there...oh.... wait.... #coronavirus #sandstorm	Al Mahboula	stephen ralph	Welcome to 'The Hunt' - WildCatPoker is out in force, ask me how to jump into tier 1? 🏆 WPTWOC PLO8 champ🏆 Bearded, tattooed Irish hunter of betting discs!!	looks like its sandstorm time in kuwaitbetter get inside quick and stay thereoh wait coronavirus sandstorm	Negative Coping		wishful thinking	0.333333	0.5	0.143	0	0.857	0.3612	0	0	1	0	929	4966	4464	9	8	1
164	164	1.25783e+18	2020-05-06	arabic_arts We ask God for wellness, safety for all of us. The state says that you gather for your safety, for the safety of others. We see it as the opposite. We want social distancing. We come back to get closer as soon as possible. A person covers his face with his hand. 🏻‍♀️ May God harm us. O Lord, remove the calamity from us.	Al Mahboula	Nadia Kawash 🌿❥ ناديا كَعْوَش	❥ مهتمة في شؤون الأدب والنقد الأدبي❥ بكالوريوس في الأدب الإنجليزي 🎓أدرُسُ النقد الأدبي ❥ عضو مؤسس لنادي شذرات الثقافي❥ مدير شؤون الطلبة ❥ جامعة بوكسهل الكويت ❥	arabic_arts ask god wellness safety us state says gather safety safety others see opposite want social distancing come back get closer soon possible person covers face hand may god harm us lord remove calamity us	Positive Coping	problem-solving		0.008333	0.266667	0.24	0.042	0.719	0.926	0	1	0	0	1372	401	9848	3	0	0
161	161	1.25882e+18	2020-05-08	During the total curfew, if you need to go to the association, follow the link, arrow down, tcollfvptnv, to visit hospitals, and also if you need a pharmacy, you can obtain a permit for one of the private hospitals and visit the hospital pharmacy, arrow down, tcosdnkqkhmqg.	Al Mahboula	Blogger_Silent_Baby ♋️🤍⚓️💙	أخشى أن أبيت في قبري و أكون نسياً منسياً، اللهُمّ سخر لي من لا ينسى أسمي عند وفاتي	total curfew need go association follow link arrow down tcollfvptnv visit hospitals also need pharmacy obtain permit one private hospitals visit hospital pharmacy arrow down	Positive Coping	problem-solving		-0.07778	0.425694	0	0	1	0	0	0	1	0	380	503	21033	0	18	0
160	160	1.259e+18	2020-05-09	noudii anasalsaleh France A total ban for two months. I return with evacuation flights. An exit document that we used to pack. We wanted to do sports. We go to the association for one hour and in the residential area because we are tight. Cases of depression increase and there will be suicide cases of those infected with the virus, my dear. tco qsqysjxzy	Al Mahboula	Blogger_Silent_Baby ♋️🤍⚓️💙	أخشى أن أبيت في قبري و أكون نسياً منسياً، اللهُمّ سخر لي من لا ينسى أسمي عند وفاتي	noudii anasalsaleh france total ban two months return evacuation fs exit document used pack wanted sports go association one hour residential area tight cases depression increase suicide cases infected virus dear	Positive Coping	problem-solving		-0.08929	0.517857	0.063	0.196	0.742	-0.908	0	0	0	0	380	503	21033	0	6	0
159	159	1.25905e+18	2020-05-09	mohdalmulla Peace be upon you, my brother Muhammad Al-Mahboula. Why did they remove the siege from it? There is no crowding and no tweets. Now there is no one to avoid Al-Mahboula. Everyone is under lockdown. Why do they let people buy their food from the rest of the world?	Al Mahboula	@q8shwrma.com	كرة القدم أخبار العالم	mohdalmulla peace upon you brother muhammad al-mahboula remove siege it crowding tweets one avoid al-mahboula everyone lockdown let people buy food rest world	Positive Coping	seeking social support		0	0	0.061	0.159	0.78	-0.5661	0	0	0	0	44	528	915	0	9	0
158	158	1.25991e+18	2020-05-11	drbaselalsabah God bless you, our dear doctor. I have been in quarantine for many days. I felt tired and developed symptoms. How are you? I called and no one answered me and then I did not press. The line got dirty. I finished a day and no one swabbed me again. They did not put the patch on. My house is quarantined. I know I am suffering from a disease that has increased.	Al Mahboula	Blogger_Silent_Baby ♋️🤍⚓️💙	أخشى أن أبيت في قبري و أكون نسياً منسياً، اللهُمّ سخر لي من لا ينسى أسمي عند وفاتي	drbaselalsabah god bless you dear doctor quarantine many days felt tired developed symptoms you called one answered press line got dirty finished day one swabbed again put patch on house quarantined know suffering disease increased	Positive Coping	positive reframing		-0.1	0.575	0.11	0.153	0.736	-0.5719	0	0	0	0	380	503	21033	0	18	0
712	712	1.25968e+18	2020-05-11	@yurikageyama I think the hot weather is not maink) making anything to this virus. I'm living at gulf countries nowadays the temperature is passing 38 degrees but the cases are still rising here. #coronavirus	Al Mahboula	Macir-i Babilyan		i think the hot weather is not maink making anything to this virus im living at gulf countries nowadays the temperature is passing degrees but the cases are still rising here coronavirus	Negative Coping		venting of emotions	0.25	0.85	0	0	1	0	0	0	0	0	53	614	4148	0	3	1
711	711	1.25991e+18	2020-05-11	Guidelines to donate blood and blood components at @KwBloodBank during the total curfew period. Let's do our part, donate blood. https://t.co/MTkEIbErC8	Al Mahboula	Bdkq8official		guidelines to donate blood and blood components at during the total curfew period lets do our part donate blood	Positive Coping	positive reframing		0	0.75	0	0	1	0	0	0	0	0	80	74	1312	0	18	0
710	710	1.26025e+18	2020-05-12	@KwBloodBank is facing huge shortage of due to 24 hrs Curfew &amp; Covid19 pandemic. Kindly step up and donate blood to save precious lives. Pls call me for assistance. #blood #Covid_19 #الحظر_الكامل #DonateBlood #kuwait #kuwaitbloodbank #teamBDK_Q8 #TogetherWeCan https://t.co/XHVFoWoByx	Al Mahboula	Bdkq8official		is facing huge shortage of due to hrs curfew amp covid pandemic kindly step up and donate blood to save precious lives pls call me for assistance blood covid donateblood kuwait kuwaitbloodbank teambdk q togetherwecan	Positive Coping	positive reframing		0.34375	0.79375	0.306	0.045	0.649	0.8934	0	0	0	0	80	74	1312	0	16	0
709	709	1.26025e+18	2020-05-12	@KwBloodBank is facing huge shortage of due to 24 hrs Curfew &amp; Covid19 pandemic. Kindly step up and donate blood to save precious lives. Pls call me for assistance. #blood #Covid_19 #الحظر_الكامل #DonateBlood… https://t.co/PuHcAzNp2P	Al Mahboula	Bdkq8official		is facing huge shortage of due to hrs curfew amp covid pandemic kindly step up and donate blood to save precious lives pls call me for assistance blood covid donateblood	Positive Coping	positive reframing		0.34375	0.79375	0.345	0.05	0.605	0.8934	0	1	0	0	3774	1088	66749	0	16	0
708	708	1.26123e+18	2020-05-15	Discrimination is the new norm #Covid_19	Al Mahboula	מחמוד אלנאש	Attorney Hussain Al Nahash & Associates Law Firm Manama	discrimination is the new norm covid	Negative Coping		venting of emotions	0.136364	0.454545	0	0	1	0	0	1	0	0	316	571	17038	5	9	1
707	707	1.26124e+18	2020-05-15	where is social distancing here?🤦‍♀️🤣... Allowing a period of two hours of walking per day is not a good idea ..tsk #kuwaitTimes #kuna #coronavirus #covid19 #kuwait #kuwaitonlockdown #StayHomeStaySafe #kuwaitcoronavirus #arabtimes #kuwaitnews #mahboula #الكويت_تتصدي_لكورونا https://t.co/lS0dPi33Kt	Al Mahboula	Thadz	If I were to give myself A single present It would be: Confidence	where is social distancing here woman facepalming rolling on the floor laughing allowing a period of two hours of walking per day is not a good idea tsk kuwaittimes kuna coronavirus covid kuwait kuwaitonlockdown stayhomestaysafe kuwaitcoronavirus arabtimes kuwaitnews mahboula	Positive Coping	mindfullness practices		-0.15833	0.333333	0.075	0.056	0.868	0.2008	0	2	3	0	150	382	2875	5	10	0
706	706	1.26136e+18	2020-05-15	They frauds... They haven’t been wearing a mask... https://t.co/iaRtRyMZBD	Al Mahboula	Vegas Robinson	Hokie Alumni....	they frauds they havent been wearing a mask	Negative Coping		denial	0	0	0	0.32	0.68	-0.5106	0	0	0	0	524	691	9443	2	18	1
157	157	1.26165e+18	2020-05-16	q e kuwait_moh About the strength except in God, O God, remove the calamity from us	Al Mahboula	Mohammed Kotb	RF Engineer @ Future Telecom Kuwait	q e kuwait_moh strength except god god remove calamity us	Positive Coping	mindfullness practices		0	0	0.363	0	0.637	0.7506	0	0	0	0	145	1162	357	0	13	0
156	156	1.26255e+18	2020-05-19	We are working, I swear to God, Corona_Egypt tcotdhepoap h	Al Mahboula	3li Mosa	هذا أنا أحُب تفكير الذئب كثيراً ليس سريع الغضب لا أثق بـِ أحد لا اخجل من أحد ما يحمله قلبى يقوله لساني وأؤمن إن الرجُل بتصرفه وموقفة وبعقله	working swear god corona_egypt	Negative Coping		self-blame	0	0	0.186	0.106	0.708	0.2263	0	0	1	1	7	225	700	0	1	1
155	155	1.26274e+18	2020-05-19	New_Corona Kuwait is rolling on the floor from laughter Rolls on the floor from laughter tcoxpsuqk pux	Al Mahboula	حسن أحمد العلي	وليس .... كل ما صرفه الله عنك شر لك ، لعلك انت الخير الذي لا يستحقونه 👌🏻 https://t.co/5ptkSuQ3Zj	new_corona kuwait rolling floor laughter rolls floor laughter	Positive Coping	mindfullness practices		0	0	0.299	0	0.701	0.7506	0	0	0	0	43	67	227	0	13	0
154	154	1.26316e+18	2020-05-20	Finally, the months of lockdown, they saw the sea mahboula tcoh bhjq tb	Al Mahboula	ยูเซฟ อัลมูไลฟี่	Add https://t.co/vZoWuuxrXU almulaifi..And Add My Instagram.. yoyoo143..And Add My Email.. yousefalmulaifi@gmail.com/ and add my snapchat.. yoyoo143	finally months lockdown saw sea mahboula	Positive Coping	engaging in relaxation techniques		0	1	0	0	1	0	0	0	0	0	347	1883	10527	1	17	0
152	152	1.26503e+18	2020-05-25	drbaselalsabah Al-Mahboula endures another ban, families are collapsing	Al Mahboula	mohamed elbakry	i love my wife and my family الاهلي رقم واحد	drbaselalsabah al-mahboula endures another ban families collapsing	Negative Coping		avoidance	0	0	0	0.492	0.508	-0.7003	0	1	0	0	41	1327	451	0	21	1
153	153	1.26486e+18	2020-05-25	kuwait_moh Mashallah, things are going down one day, oh Lord, make things easier	Al Mahboula	احمد السوهاجي	احب الاحترام واعشق بلدي الحبيبه مصر 🇪🇬ابــ,ٰـن سوهاج 😍اهلاوي😍	kuwait_moh mashallah things going one day oh lord make things easier	Positive Coping	mindfullness practices		-0.15556	0.288889	0.189	0	0.811	0.4215	0	0	0	0	388	1278	8418	1	10	0
705	705	1.26589e+18	2020-05-28	@tenshigv I’m okay na, maharrrr. I finished my supposed 2 weeks quarantine and naextend ulit sya ng 2 weeks. Pero ngayon, I’m totally okay na. Please pray for me as I start again my duty on June 1. Stay safe always 😘	Al Mahboula	A_SOLID FUMI ❤️	| Registered Nurse 👩🏼‍⚕️ | Roman Catholic ✝️ | OFW |📍Kuwait |	im okay na mahar i finished my supposed weeks quarantine and naextend ulit sya ng weeks pero ngayon im totally okay na please pray for me as i start again my duty on june stay safe always face blowing a kiss	Positive Coping	seeking social support		0.5	0.5	0.295	0	0.705	0.9128	1	1	1	0	550	506	5786	0	6	0
150	150	1.26641e+18	2020-05-29	rawanii meshalzaid_kuwait_moh Its numbers are not as high as those of Jleeb and Farwaniya	Al Mahboula	mohamed elbakry	i love my wife and my family الاهلي رقم واحد	rawanii meshalzaid_kuwait_moh numbers high jleeb farwaniya	Positive Coping	positive reframing		0.16	0.54	0	0	1	0	0	0	0	0	41	1327	451	0	16	0
151	151	1.26632e+18	2020-05-29	We refuse_the_continuation_of_isolation_of_Mahboula Families of resident citizens and not just single people The ban on Mahboula has begun to result in the lack of food and important needs for every home and pictures of government agencies, committees, laughter, the media believes in Kuwait, Mahboula is suffocating	Al Mahboula	mohamed elbakry	i love my wife and my family الاهلي رقم واحد	refuse_the_continuation_of_isolation_of_mahboula families resident citizens single people ban mahboula begun result lack food important needs every home pictures government agencies committees laughter media believes kuwait mahboula suffocating	Negative Coping		avoidance	-0.05714	0.571429	0.096	0.114	0.79	-0.2263	0	0	0	0	41	1327	451	0	11	1
149	149	1.26655e+18	2020-05-30	Pictures dating back to 1 year during the Spanish flu pandemic. History repeats itself. It will pass, God willing. Losing a point. Losing a point. tcorikdw v n	Al Mahboula	Blogger_Silent_Baby ♋️🤍⚓️💙	أخشى أن أبيت في قبري و أكون نسياً منسياً، اللهُمّ سخر لي من لا ينسى أسمي عند وفاتي	pictures dating back 1 year spanish flu pandemic history repeats itself pass god willing losing point losing point	Positive Coping	positive reframing		0.083333	0.25	0.062	0.23	0.708	-0.6908	0	1	0	0	380	503	21033	0	2	0
704	704	1.26756e+18	2020-06-01	Travel destination once this pandemic is over https://t.co/xpURrgfbJS	Al Mahboula	מחמוד אלנאש	Attorney Hussain Al Nahash & Associates Law Firm Manama	travel destination once this pandemic is over	Positive Coping	positive reframing		0	0	0	0	1	0	0	0	0	0	316	571	17038	5	21	0
703	703	1.26829e+18	2020-06-03	The robot quarantine nurse was a waitress in #netherlands before she comes to #bahrain ?! https://t.co/ROt4kAvEtM	Al Mahboula	מחמוד אלנאש	Attorney Hussain Al Nahash & Associates Law Firm Manama	the robot quarantine nurse was a waitress in netherlands before she comes to bahrain	Positive Coping	mindfullness practices		0	0	0	0	1	0	1	0	0	0	316	571	17038	5	21	0
702	702	1.26892e+18	2020-06-05	Having been in regional lockdown for near 3 months now (half of that inside 22hrs a day) I feel very disconnected to world events. Like its reality show that I've missed 2 seasons of. #coronavirus #lockdownextension	Al Mahboula	stephen ralph	Welcome to 'The Hunt' - WildCatPoker is out in force, ask me how to jump into tier 1? 🏆 WPTWOC PLO8 champ🏆 Bearded, tattooed Irish hunter of betting discs!!	having been in regional lockdown for near months now half of that inside hrs a day i feel very disconnected to world events like its reality show that ive missed seasons of coronavirus lockdownextension	Negative Coping		venting of emotions	0.044444	0.288889	0.068	0.06	0.872	0.0772	0	0	0	0	929	4966	4464	9	14	1
148	148	1.26899e+18	2020-06-05	The treatment of Corona has come, boys, may God be kind to us. Thank you, the government of Kuwait. Flag for Kuwait is muscle by muscle tcoydfgobighc	Al Mahboula	3li Mosa	هذا أنا أحُب تفكير الذئب كثيراً ليس سريع الغضب لا أثق بـِ أحد لا اخجل من أحد ما يحمله قلبى يقوله لساني وأؤمن إن الرجُل بتصرفه وموقفة وبعقله	treatment corona come boys may god kind us thank you government kuwait flag kuwait muscle muscle	Positive Coping	positive reframing		0.6	0.9	0.25	0	0.75	0.7906	0	0	0	0	7	225	700	0	19	0
147	147	1.26968e+18	2020-06-07	maya no abonawafkw abdullahgzali kuwait_moh You are right that the company continues to supply oil and we have many injuries. Workers who have quarantined belong to the company with perjury. Whoever is infected turns perjury or sits in the apartment to live and there is no stopping work. Swabs for the rest of the workers. I mean, God is generous.	Al Mahboula	احمد السوهاجي	احب الاحترام واعشق بلدي الحبيبه مصر 🇪🇬ابــ,ٰـن سوهاج 😍اهلاوي😍	maya abonawafkw abdullahgzali kuwait_moh right company continues supply oil many injuries workers quarantined belong company perjury whoever infected turns perjury sits apartment live stopping work swabs rest workers mean god generous	Positive Coping	problem-solving		0.152394	0.555804	0.096	0.158	0.746	-0.6549	0	0	0	0	388	1278	8418	1	17	0
146	146	1.26974e+18	2020-06-07	tafteshq Ministry_of_Health There must be a solution for families living in the Mahboula area in Kuwait Now months without_work_without_salaries	Al Mahboula	@q8shwrma.com	كرة القدم أخبار العالم	tafteshq ministry_of_health must solution families living mahboula area kuwait months without_work_without_salaries	Negative Coping		avoidance	0	0	0.113	0	0.887	0.3182	0	0	1	0	44	528	915	0	21	1
145	145	1.26997e+18	2020-06-08	trendnews kuwait_moh drayalsanad pr_moh_kw There must be a solution for expatriate families living in the Mahboula area. Allow families to go out to work. We can afford our children’s expenses and rent. Now, months without_work_without_salaries	Al Mahboula	@q8shwrma.com	كرة القدم أخبار العالم	trendnews kuwait_moh drayalsanad pr_moh_kw must solution expatriate families living mahboula area allow families go work afford children expenses rent now months without_work_without_salaries	Negative Coping		avoidance	0	0	0.113	0	0.887	0.4939	0	0	2	0	44	528	915	0	12	1
144	144	1.26998e+18	2020-06-08	Ministry of Health: There must be a solution for the expatriate families living in the Mahboula area. Allow the families to go out to work. We can afford our children’s expenses and rent. Now, months without_work_without_salaries	Al Mahboula	@q8shwrma.com	كرة القدم أخبار العالم	ministry health must solution expatriate families living mahboula area allow families go work afford children expenses rent now months without_work_without_salaries	Negative Coping		avoidance	0	0	0.11	0	0.89	0.4939	0	0	2	0	44	528	915	0	12	1
143	143	1.26998e+18	2020-06-08	There must be a solution for the expatriate families living in the Mahboula area. Allow the families to go out to work so that we can afford our children’s expenses and rent. Now, months without_work_without_salaries Ministry of Health	Al Mahboula	@q8shwrma.com	كرة القدم أخبار العالم	must solution expatriate families living mahboula area allow families go work afford children expenses rent now months without_work_without_salaries ministry health	Negative Coping		avoidance	0	0	0.104	0	0.896	0.4939	1	1	3	0	44	528	915	0	12	1
142	142	1.27033e+18	2020-06-09	Post your picture when you are young. Ministry of Health. There must be a solution for the expatriate families living in the Mahboula area. Allow the families to go out to work. We can afford our children’s expenses and rent. Now there are months without work and without salaries.	Al Mahboula	@q8shwrma.com	كرة القدم أخبار العالم	post picture young ministry health must solution expatriate families living mahboula area allow families go work afford children expenses rent months without work without salaries	Negative Coping		avoidance	0.1	0.4	0.082	0	0.918	0.4939	0	1	0	0	44	528	915	0	12	1
141	141	1.27104e+18	2020-06-11	kuwait_moh There must be a solution for the expatriate families living in the Mahboula area. Allow the families to go out to work so that we can afford our children’s expenses and rent. Now there are months without_work_without_salaries	Al Mahboula	@q8shwrma.com	كرة القدم أخبار العالم	kuwait_moh must solution expatriate families living mahboula area allow families go work afford children expenses rent months without_work_without_salaries	Negative Coping		avoidance	0	0	0.104	0	0.896	0.4939	4	0	18	0	44	528	915	0	11	1
140	140	1.27143e+18	2020-06-12	Al-Mahboula is suffocating Al-Mahboula Ministry of Health Faisal Al-Qenaei Families of expatriates in Mahboula Allow the head of the family to go out and work. Now months without work and without salaries. If the head of the family leaves the right to work, he returns to his wife and children while they are in contact, and he certainly protects himself because he fears for his children and wife.	Al Mahboula	@q8shwrma.com	كرة القدم أخبار العالم	al-mahboula suffocating al-mahboula ministry health faisal al-qenaei families expatriates mahboula allow head family go work months without work without salaries head family leaves right work returns wife children contact certainly protects fears children wife	Positive Coping	problem-solving		-9.3e-18	0.535714	0.09	0.038	0.872	0.4215	4	0	4	0	44	528	915	0	13	0
139	139	1.27143e+18	2020-06-12	aelwaz Al-Mahboula_choking Al-Mahboula Ministry_of-Health Faisal_Al-Qenaei Families of expatriates in Mahboula Allow the head of the family to go out and work. Then months without work and without salaries. If the head of the family leaves the right to work, he returns to his wife and children while they are in contact, and he certainly keeps it because he fears for his children and wife	Al Mahboula	@q8shwrma.com	كرة القدم أخبار العالم	aelwaz al-mahboula_choking al-mahboula ministry_of-health faisal_al-qenaei families expatriates mahboula allow head family go work months without work without salaries head family leaves right work returns wife children contact certainly keeps fears children wife	Positive Coping	problem-solving		0.25	0.553571	0.063	0.041	0.896	0.128	2	1	2	0	44	528	915	0	13	0
134	134	1.2719e+18	2020-06-13	s_alharbi Humanitarian release Ministry of Health Al-Mahboula is suffocating Al-Mahboula I swear to God, a newspaper publishes the news of the deconfinement around me and I will leave Al-Mahboula, which is for families. Months of isolation must be solved. Deconfinement from Al-Mahboula must be resolved. May God honor you and reach our voice.	Al Mahboula	@q8shwrma.com	كرة القدم أخبار العالم	s_alharbi humanitarian release ministry health al-mahboula suffocating al-mahboula swear god newspaper publishes news deconfinement around leave al-mahboula families months isolation must solved deconfinement al-mahboula must resolved may god honor reach voice	Negative Coping		avoidance	-0.5	0.5	0.2	0.083	0.717	0.7351	1	0	2	0	44	528	915	0	20	1
129	129	1.27191e+18	2020-06-13	Corona_Kuwait Ministry_of_Health_Al_Mahboula_is_suffocating_Al_Mahboula, I swear to God, a newspaper publishes the news of the lifting of isolation around me, and I will leave Al-Mahboula, which is for families. Months of isolation must be solved. Breaking_of_isolation_from_Al-Mahboula	Al Mahboula	@q8shwrma.com	كرة القدم أخبار العالم	corona_kuwait ministry_of_health_al_mahboula_is_suffocating_al_mahboula swear god newspaper publishes news lifting isolation around me leave al-mahboula families months isolation must solved breaking_of_isolation_from_al-mahboula	Negative Coping		avoidance	0	0	0.105	0.195	0.7	-0.3818	6	0	7	0	44	528	915	0	20	1
132	132	1.27191e+18	2020-06-13	Release_of_Al_Mahboula The Ministry_of_Health_Al-Mahboula_is_choking_Al-Mahboula, I swear to God, a newspaper publishes the news of the lifting of isolation around me, and I will leave Al-Mahboula, which is for families. Months of isolation. The removal of_isolation_from_Al-Mahboula must be solved	Al Mahboula	@q8shwrma.com	كرة القدم أخبار العالم	release_of_al_mahboula ministry_of_health_al-mahboula_is_choking_al-mahboula swear god newspaper publishes news lifting isolation around me leave al-mahboula families months isolation removal of_isolation_from_al-mahboula must solved	Negative Coping		avoidance	0	0	0.098	0.181	0.721	-0.3818	1	0	1	0	44	528	915	0	20	1
133	133	1.2719e+18	2020-06-13	Al-Mahboula_suffocating_humanitarian_release The Ministry_of_Health_Al-Mahboula_suffocating_Al-Mahboula I swear to God, a newspaper publishes the news of the deconfinement around me and I will leave Al-Mahboula, which is for families, for months of isolation. The deconfliction_of_Al-Mahboula must be solved	Al Mahboula	@q8shwrma.com	كرة القدم أخبار العالم	al-mahboula_suffocating_humanitarian_release ministry_of_health_al-mahboula_suffocating_al-mahboula swear god newspaper publishes news deconfinement around leave al-mahboula families months isolation deconfliction_of_al-mahboula must solved	Negative Coping		avoidance	0	0	0.107	0.13	0.763	0.0258	1	0	1	0	44	528	915	0	20	1
130	130	1.27191e+18	2020-06-13	barlamany_sms Ministry of Health Al-Mahboula is suffocating Al-Mahboula, I swear to God, a newspaper publishes news about the lifting of isolation around me, and I will leave Al-Mahboula, which is for families. The months of isolation must be solved. Breaking the isolation from Al-Mahboula must be solved.	Al Mahboula	@q8shwrma.com	كرة القدم أخبار العالم	barlamany_sms ministry health al-mahboula suffocating al-mahboula swear god newspaper publishes news lifting isolation around me leave al-mahboula families months isolation must solved breaking isolation al-mahboula must solved	Negative Coping		avoidance	-0.5	0.5	0.113	0.188	0.699	-0.4939	0	0	1	0	44	528	915	0	20	1
135	135	1.2719e+18	2020-06-13	Humanitarian release Ministry of Health Al-Mahboula is suffocating Al-Mahboula I swear to God, a newspaper publishes the news of deconfinement around me and I will leave Al-Mahboula, which is for families. Months of isolation. Deconfinement must be solved from Al-Mahboula	Al Mahboula	@q8shwrma.com	كرة القدم أخبار العالم	humanitarian release ministry health al-mahboula suffocating al-mahboula swear god newspaper publishes news deconfinement around leave al-mahboula families months isolation deconfinement must solved al-mahboula	Negative Coping		avoidance	-0.5	0.5	0.095	0.115	0.79	0.0258	0	0	1	0	44	528	915	0	20	1
137	137	1.27183e+18	2020-06-13	s_alharbi Al-Mahboula_suffocates Al-Mahboula Ministry of Health Expatriate families in Al-Mahboula Allow the head of the family to go out and work. Now months without work and without salaries. If the head of the family leaves the right to work, he returns to his wife and children while they are in contact, and he certainly protects himself because he fears for his children and wife.	Al Mahboula	@q8shwrma.com	كرة القدم أخبار العالم	s_alharbi al-mahboula_suffocates al-mahboula ministry health expatriate families al-mahboula allow head family go work months without work without salaries head family leaves right work returns wife children contact certainly protects fears children wife	Positive Coping	problem-solving		0.25	0.553571	0.095	0.04	0.865	0.4215	6	0	13	0	44	528	915	0	15	0
701	701	1.2718e+18	2020-06-13	3 months of isolation. Still have food on our table. No sick on family. Thank you lord. #الحمدالله #كورونا #كورونا_الكويت #المهبوله #المهبولة_تختنق #Covid_19 #COVID19 #coronaviruskuwait	Al Mahboula	Eng. Sherin S	IF the world is hard just keep your head UP	months of isolation still have food on our table no sick on family thank you lord covid covid coronaviruskuwait	Positive Coping	mindfullness practices		0.357143	0.857143	0.218	0.113	0.669	0.3616	1	0	7	0	70	166	703	1	13	0
136	136	1.27188e+18	2020-06-13	May God bless you, may God lift the calamity, O Lord, Safaa_Al-Hashem Nayef_Hamdan Ministry of Health tcouozzfy swj	Al Mahboula	@q8shwrma.com	كرة القدم أخبار العالم	may god bless you may god lift calamity lord safaa_al-hashem nayef_hamdan ministry health	Positive Coping	mindfullness practices		0	0	0.318	0	0.682	0.7184	0	0	0	0	44	528	915	0	18	0
131	131	1.27191e+18	2020-06-13	almajlliss Ministry of Health Al-Mahboula is suffocating Al-Mahboula, I swear to God, a newspaper publishes news about the lifting of isolation around me, and I will leave Al-Mahboula, which is for families. The months of isolation must be solved. Breaking the isolation from Al-Mahboula must be solved.	Al Mahboula	@q8shwrma.com	كرة القدم أخبار العالم	almajlliss ministry health al-mahboula suffocating al-mahboula swear god newspaper publishes news lifting isolation around me leave al-mahboula families months isolation must solved breaking isolation al-mahboula must solved	Negative Coping		avoidance	-0.5	0.5	0.113	0.188	0.699	-0.4939	0	0	3	0	44	528	915	0	20	1
138	138	1.27183e+18	2020-06-13	alsaeedfajer Al-Mahboula_suffocates Al-Mahboula Ministry of Health Expatriate families in Mahboula Allow the head of the family to go out and work. Then months without work and without salaries. If the head of the family leaves the right to work, he returns to his wife and children while they are in contact, and he certainly protects himself because he fears for his children and wife	Al Mahboula	@q8shwrma.com	كرة القدم أخبار العالم	alsaeedfajer al-mahboula_suffocates al-mahboula ministry health expatriate families mahboula allow head family go work months without work without salaries head family leaves right work returns wife children contact certainly protects fears children wife	Positive Coping	problem-solving		0.25	0.553571	0.095	0.04	0.865	0.4215	1	0	2	0	44	528	915	0	15	0
127	127	1.27263e+18	2020-06-15	Kuwaitis_without_salaries Mahboula_suffocating Mahboula Ministry_of_Health Expatriate families in Mahboula Allow the head of the family to go out and work. Now months without work and without salaries The head of the family, if he leaves the right to work, returns to his wife and children, and he certainly protects himself because he fears for his children and wife	Al Mahboula	@q8shwrma.com	كرة القدم أخبار العالم	kuwaitis_without_salaries mahboula_suffocating mahboula ministry_of_health expatriate families mahboula allow head family go work months without work without salaries head family leaves right work returns wife children certainly protects fears children wife	Positive Coping	problem-solving		0.25	0.553571	0.106	0.045	0.849	0.4215	1	0	2	0	44	528	915	0	20	0
128	128	1.27262e+18	2020-06-15	The Mahaboula of Mahboula, we would like to take people’s opinion - just for optimism. Which area of ​​the isolated areas will be removed from isolation first? Mahboula is suffocating. Mahboula is suffocating around me. Jleeb Al-Shuyoukh. We refuse to continue isolating Al-Mahboula. Corona_Kuwait. Covid. Kuwait. Corona_in_Kuwait.	Al Mahboula	Eng. Sherin S	IF the world is hard just keep your head UP	mahaboula mahboula would take people opinion optimism area ​​the isolated areas removed isolation first mahboula suffocating mahboula suffocating around me jleeb al-shuyoukh refuse continue isolating al-mahboula corona_kuwait covid kuwait corona_in_kuwait	Positive Coping	positive reframing		-0.25	0.444444	0.109	0.13	0.761	-0.0516	4	4	7	0	70	166	703	1	19	0
124	124	1.27296e+18	2020-06-16	s_h_abdullah It's not the matter, the total ban, the kidney stone, the joy of a fist, a single modified emoji	Al Mahboula	🚒Hashem🇰🇼	افْعَلُوا الخيرَ ولا تحقِرُوا منهُ شيْئاً !	s_h_abdullah matter total ban kidney s joy fist single modified emoji	Positive Coping	mindfullness practices		0.242857	0.388095	0.147	0.193	0.66	-0.0431	0	0	0	0	210	182	9631	1	18	0
125	125	1.27285e+18	2020-06-16	kuwait_moh Al-Mahboula_choking Al-Mahboula Ministry of Health Arrivals in Al-Mahboula Months of isolation for a week without infections Newspapers started saying that the isolation of Al-Mahboula will emerge to the highest areas. Months without work and without salaries. How do people live?	Al Mahboula	@q8shwrma.com	كرة القدم أخبار العالم	kuwait_moh al-mahboula_choking al-mahboula ministry health arrivals al-mahboula months isolation week without infections newspapers started saying isolation al-mahboula emerge highest areas months without work without salaries people live	Positive Coping	positive reframing		0.136364	0.5	0	0.122	0.878	-0.6597	6	1	7	0	44	528	915	0	11	0
126	126	1.27283e+18	2020-06-16	The disappearance of clergy, the closure of places of worship for months, the world lost. The answer is something to imagine. The disappearance of technology engineers and doctors. The closure of hospitals and the closure of associations for a week. Corona_Kuwait will happen. Corona_Covid_Al-Mahboula_suffocates Al-Mahboula-Kuwait	Al Mahboula	Eng. Sherin S	IF the world is hard just keep your head UP	disappearance clergy closure places worship months world lost answer something imagine disappearance technology engineers doctors closure hospitals closure associations week corona_kuwait happen corona_covid_al-mahboula_suffocates al-mahboula-kuwait	Negative Coping		denial	0	0	0.046	0.048	0.905	-0.0258	1	2	3	0	70	166	703	1	10	1
123	123	1.27317e+18	2020-06-17	Morning and morning, I love you. I search for you. I chase your ghost. The only time is your time. And the words were creation. Good morning. Good morning. International_Father_Day. International_Love_Day. Snap_Corona_in_Kuwait. I love you.	Al Mahboula	Eng. Sherin S	IF the world is hard just keep your head UP	morning morning love you search you chase ghost time time words creation good morning good morning international_father_day international_love_day snap_corona_in_kuwait love you	Positive Coping	positive reframing		0.48	0.68	0.342	0.048	0.609	0.9325	0	0	2	0	70	166	703	1	8	0
122	122	1.2733e+18	2020-06-17	Long live Mahboula Al-Mahboula - Live in the moment, for life makes up for the realization that one day you will speak the truth. Remember, we used to protest and write in the old program called “Twitter’s Nations,” right, and then you smile and remember the good and bitter days ❤️🥰 Al-Mahboula Al-Mahboula_choking Corona_Kuwait Corona_in_Kuwait	Al Mahboula	Eng. Sherin S	IF the world is hard just keep your head UP	long live mahboula al-mahboula live moment life makes realization one day speak truth remember used protest write old program called twitter nations right smile remember good bitter days red heart al-mahboula al-mahboula_choking corona_kuwait corona_in_kuwait	Positive Coping	positive reframing		0.188555	0.416964	0.203	0.065	0.732	0.8807	1	3	10	0	70	166	703	1	16	0
119	119	1.27408e+18	2020-06-19	s_alharbi kuwait_moh Doctor, the Mahboula area is inhabited by a thousand. If the day of charitable societies is a meal, people are hungry. May God reward you with goodness. May God honor Kuwait, protect it from evil, and remove the calamity.	Al Mahboula	@q8shwrma.com	كرة القدم أخبار العالم	s_alharbi kuwait_moh doctor mahboula area inhabited thousand day charitable societies meal people hungry may god reward goodness may god honor kuwait protect evil remove calamity	Negative Coping		avoidance	-0.2	0.9	0.342	0.077	0.581	0.9186	1	0	5	1	44	528	915	0	20	1
120	120	1.27405e+18	2020-06-19	s_alharbi kuwait_moh Doctor, how will the isolation of the areas be evaluated and the Mahboula area be removed from the isolation? We would like to know anything that will remove the isolation. May God benefit you.	Al Mahboula	@q8shwrma.com	كرة القدم أخبار العالم	s_alharbi kuwait_moh doctor isolation areas evaluated mahboula area removed isolation would know anything remove isolation may god benefit you	Negative Coping		avoidance	0	0	0.166	0.177	0.656	-0.128	0	1	2	0	44	528	915	0	18	1
121	121	1.2739e+18	2020-06-19	Al-Mahboula Al-Mahboula_suffocates Live their healthy lives in Al-Mahboula and let you write the numbers of Corona cases Corona_in_Kuwait tco mytsgzkxe	Al Mahboula	Eng. Sherin S	IF the world is hard just keep your head UP	al-mahboula al-mahboula_suffocates live healthy lives al-mahboula let write numbers corona cases corona_in_kuwait	Positive Coping	engaging in relaxation techniques		0.318182	0.5	0.124	0	0.876	0.4019	0	2	3	0	70	166	703	1	8	0
118	118	1.27443e+18	2020-06-20	trendnews about the power of God except in God. Awareness must be raised in all languages. Suicide cases are increasing. A final word for Corona. Workers of the Ministry of Electricity. Kuwait. Barber shops. The Ministry of Health. Al-Mahboula. Al-Mahboula is suffocating.	Al Mahboula	@q8shwrma.com	كرة القدم أخبار العالم	trendnews power god except god awareness must raised languages suicide cases increasing final word corona workers ministry electricity kuwait barber shops ministry health al-mahboula al-mahboula suffocating	Negative Coping		avoidance	-0.25	0.75	0.088	0.094	0.818	-0.3182	1	0	4	0	44	528	915	0	20	1
700	700	1.27421e+18	2020-06-20	@KwBloodBank Launching an electronic platform to register those recovering from Covid-19 disease to facilitate their donation of immune plasma to treat people with coronavirus https://t.co/t7WyTJP3B1. Call us for any support #letsmakeachange #togetherwecan #teamBDK_Q8 https://t.co/XVwcGtYVIh	Al Mahboula	Bdkq8official		launching an electronic platform to register those recovering from covid disease to facilitate their donation of immune plasma to treat people with coronavirus call us for any support letsmakeachange togetherwecan teambdk q	Positive Coping	positive reframing		0	0	0.208	0	0.792	0.765	1	0	1	0	80	74	1312	0	5	0
117	117	1.27579e+18	2020-06-24	The best farbuccino Mahabil Starbucks Al Mahboula Al Mahboula Al Mahboula_choking Corona_in_Kuwait Corona_Kuwait Star_bucks starbucks coffee tcokguvlee m	Al Mahboula	Eng. Sherin S	IF the world is hard just keep your head UP	best farbuccino mahabil starbucks al mahboula al mahboula al mahboula_choking corona_in_kuwait corona_kuwait star_bucks starbucks coffee	Positive Coping	engaging in relaxation techniques		1	0.3	0.198	0	0.802	0.6369	0	0	3	0	70	166	703	1	13	0
113	113	1.27618e+18	2020-06-25	zjjran Al-Mahboula is suffocating, by God, it is forbidden to look to the interests of companies as long as their workers go out on the day of Al-Mahboula, they talk and the families, that's it, our children have become mentally ill. Stay home. Ministry of Health - Kuwaiti Cabinet of Ministers drbaselalsabah bb_alkhudari atvkw alsaeedfajer dralkhayat drayalsanad	Al Mahboula	@q8shwrma.com	كرة القدم أخبار العالم	zjjran al-mahboula suffocating god forbidden look interests companies long workers go day al-mahboula talk families that it children become mentally ill stay home ministry health kuwaiti cabinet ministers drbaselalsabah bb_alkhudari atvkw alsaeedfajer dralkhayat drayalsanad	Negative Coping		avoidance	-0.35	0.633333	0.065	0.089	0.845	-0.3612	0	0	2	0	44	528	915	0	16	1
115	115	1.27616e+18	2020-06-25	The second phase means they opened the areas in Hawalli that had no infections because their workers were occupying the complexes and the owners of the companies wanted their crazy workers to have no infections. We will tell you the reasons for the Ministry of Health.	Al Mahboula	@q8shwrma.com	كرة القدم أخبار العالم	second phase means opened areas hawalli infections workers occupying complexes owners companies wanted crazy workers infections tell reasons ministry health	Negative Coping		avoidance	-0.3	0.45	0	0.137	0.863	-0.7003	2	0	4	0	44	528	915	0	14	1
116	116	1.27612e+18	2020-06-25	May God grant you relief soon. Today is a day of stone	Al Mahboula	מחמוד אלנאש	Attorney Hussain Al Nahash & Associates Law Firm Manama	may god grant relief soon today day s	Positive Coping	mindfullness practices		0	0	0.461	0	0.539	0.7717	0	1	0	0	316	571	17038	5	12	0
114	114	1.27616e+18	2020-06-25	Al-Mahboula is suffocating, and by God, it is forbidden to look to the interests of companies as long as their workers go out on the day of Al-Mahboula to speak and the families. Our children are over. They have become mentally ill. Stay at home. Ministry of Health. Kuwaiti Cabinet of Ministers drbaselalsabah bb_alkhudari atvkw alsaeedfajer dralkhayat drayalsanad	Al Mahboula	@q8shwrma.com	كرة القدم أخبار العالم	al-mahboula suffocating god forbidden look interests companies long workers go day al-mahboula speak families children over become mentally ill stay home ministry health kuwaiti cabinet ministers drbaselalsabah bb_alkhudari atvkw alsaeedfajer dralkhayat drayalsanad	Negative Coping		avoidance	-0.35	0.633333	0.064	0.088	0.848	-0.3612	3	1	10	0	44	528	915	0	14	1
112	112	1.27619e+18	2020-06-25	Al-Mahboula - how long will Al-Mahboula - suffocate - God is forbidden - it is in the interests of companies as long as their workers go out on the day of Al-Mahboula, they are talking and the families are finished. Our children have become mentally ill. They stay at home. Ministry of Health - Kuwaiti Cabinet of Ministers drbaselalsabah bb_alkhudari atvkw	Al Mahboula	@q8shwrma.com	كرة القدم أخبار العالم	al-mahboula long al-mahboula suffocate god forbidden interests companies long workers go day al-mahboula talking families finished children become mentally ill stay home ministry health kuwaiti cabinet ministers drbaselalsabah bb_alkhudari atvkw	Negative Coping		avoidance	-0.2	0.6	0.061	0.084	0.855	-0.3612	1	0	4	0	44	528	915	0	16	1
111	111	1.27621e+18	2020-06-25	Malls and parks: Corona is less terrifying than Mahboula. Please make us happy with the opening of the cinema - because cinema is Corona less than Mahboula. It is permissible for you to become fair. Malls and parks will be open and cinemas. We refuse to isolate the cinemas. Mahboula is suffocating Corona_Kuwait	Al Mahboula	Eng. Sherin S	IF the world is hard just keep your head UP	malls parks corona less terrifying mahboula please make us happy opening cinema cinema corona less mahboula permissible become fair malls parks open cinemas refuse isolate cinemas mahboula suffocating corona_kuwait	Positive Coping	mindfullness practices		-0.04762	0.57619	0.132	0.118	0.75	0.2247	0	0	7	0	70	166	703	1	17	0
109	109	1.27651e+18	2020-06-26	kuwait_moh Look at Mahboula, it is forbidden	Al Mahboula	Abedelhlim	‏‏‏‏‏الوهم نصف الداء ، والاطمئنان نصف الدواء ، والصبر أول خطوات الشفاء ! ‏- ابن سينا	kuwait_moh look mahboula forbidden	Negative Coping		avoidance	0	0	0	0.318	0.682	-0.4215	0	0	0	0	161	170	6155	0	13	1
110	110	1.27646e+18	2020-06-26	Al-Mahboula is suffocating Al-Mahboula A pause in solidarity with the Bedouins Suicide of a medical student without Friday The Ministry of Health The condition of people outside Al-Mahboula Isolated for most months and those who have no infections tconatluloopt	Al Mahboula	@q8shwrma.com	كرة القدم أخبار العالم	al-mahboula suffocating al-mahboula pause solidarity bedouins suicide medical student without friday ministry health condition people outside al-mahboula isolated months infections	Negative Coping		avoidance	0	0.2625	0.048	0.195	0.758	-0.7783	0	0	0	0	44	528	915	0	10	1
108	108	1.27681e+18	2020-06-27	barlamany_sms Al-Mahboula_suffocating Al-Mahboula_For_when and the families, children and head of the family whose work was destroyed due to non-attendance. The companies hired people other than us because we have a ban and our families are isolated for no reason. The problem is that we are not family workers either and we have become in debt for groceries and rent.	Al Mahboula	@q8shwrma.com	كرة القدم أخبار العالم	barlamany_sms al-mahboula_suffocating al-mahboula_for_when families children head family whose work destroyed due non-attendance companies hired people us ban families isolated reason problem family workers either become debt groceries rent	Negative Coping		avoidance	-0.125	0.375	0	0.237	0.763	-0.9382	1	0	3	1	44	528	915	0	9	1
107	107	1.27739e+18	2020-06-28	waleedalessa kuwait_moh Even if we are injured, we die of hunger, and we are families with children who are satisfied. We live on the debt of groceries and the debt of the rent. If anything is ruined in the apartment, I can talk to the guard who wants rent so that you can go to him. If it is not for us, because our children are forbidden, the Prophet of honorable men delivers the voice of Mahboul…	Al Mahboula	@q8shwrma.com	كرة القدم أخبار العالم	waleedalessa kuwait_moh even injured die hunger families children satisfied live debt groceries debt rent anything ruined apartment talk guard wants rent go him us children forbidden prophet honorable men delivers voice mahboula kuwait	Negative Coping		avoidance	0.278788	0.533333	0.066	0.206	0.728	-0.9042	0	0	3	0	44	528	915	0	23	1
106	106	1.27867e+18	2020-07-02	The Ministry of Health report is very late. For the first time, the beginning of the crisis is clear that there is a specific arrangement. May God protect it. Al-Mahboula is suffocating	Al Mahboula	tamer		ministry health report late first time beginning crisis clear specific arrangement may god protect it al-mahboula suffocating	Negative Coping		denial	-0.108	0.424333	0.185	0.104	0.711	0.296	0	3	2	0	8	75	243	0	12	1
699	699	1.27902e+18	2020-07-03	@qqxy19 @KeNotletyougo @AvaSalvaJe19 @Red_atinsss @CovetFashion14 @Kenken60128059 @Vanessa26343672 @Cherryoon16 @jhenseligbon_24 @Rosemar78816538 @AllegraJoie @ChickenSoup_KEN @SB19Official movie ng the man in the iron mask @SB19Official SB19 VotingDay	Al Mahboula	regie	silence	movie ng the man in the iron mask sb votingday	Positive Coping	engaging in relaxation techniques		0	0	0	0	1	0	5	0	3	0	294	340	24777	0	11	0
105	105	1.28001e+18	2020-07-06	I want, you want, and Corona as a result. We want good morning morningsᅠ Corona_Kuwait Covid	Al Mahboula	Eng. Sherin S	IF the world is hard just keep your head UP	want want corona result want good morning morningsᅠ corona_kuwait covid	Positive Coping	mindfullness practices		0.7	0.6	0.362	0	0.638	0.5859	0	0	2	0	70	166	703	1	5	0
104	104	1.28009e+18	2020-07-06	Al-Mahboula Al-Mahboula_suffocating Al-Mahboula_for_how long Mahabeel_Al-Mahboula Corona_Kuwait Mahabeel Al-Mahboula holds the tongue rolling on the floor from laughter tcoowabofqm k	Al Mahboula	Eng. Sherin S	IF the world is hard just keep your head UP	al-mahboula al-mahboula_suffocating al-mahboula_for_how long mahabeel_al-mahboula corona_kuwait mahabeel al-mahboula holds tongue rolling floor laughter	Positive Coping	mindfullness practices		-0.05	0.4	0.151	0	0.849	0.4939	1	1	2	1	70	166	703	1	10	0
103	103	1.28096e+18	2020-07-08	Praise be to God and full of praise. The monsters want to breathe. Oxygen reaches our brain and we want to open up the world. May God keep you more and more. The streets, malls and the sea fail us. Enough with us. The medal of the monsters. Keep us holding our heads up. The idiots are breathing. The idiots are breathing. Mahabils_Al-Mahboula. Corona_Kuwait. Congratulations.	Al Mahboula	Eng. Sherin S	IF the world is hard just keep your head UP	praise god full praise monsters want breathe oxygen reaches brain want open world may god keep more streets malls sea fail us enough us medal monsters keep us holding heads up idiots breathing idiots breathing mahabils_al-mahboula corona_kuwait congratulations	Positive Coping	mindfullness practices		-0.09375	0.55625	0.275	0.043	0.682	0.9403	1	1	7	0	70	166	703	1	20	0
102	102	1.28097e+18	2020-07-08	May God grant you good health, good morals, etiquette and commitment. May God always grant you success. Al-Mahboula_breathes Al-Mahboula_Corona_in_Kuwait Kuwait Covid_tconz jnjvbul	Al Mahboula	Eng. Sherin S	IF the world is hard just keep your head UP	may god grant good health good morals etiquette commitment may god always grant success al-mahboula_breathes al-mahboula_corona_in_kuwait kuwait	Positive Coping	mindfullness practices		0.566667	0.4	0.603	0	0.397	0.9601	1	0	3	0	70	166	703	1	21	0
698	698	1.28097e+18	2020-07-08	Its in Amazon now- Mahboula T-shirt 💃 #amazon #المهبوله #كويت #كورونا_في_الكويت #مبروك https://t.co/bc2q9ZybLW	Al Mahboula	Eng. Sherin S	IF the world is hard just keep your head UP	its in amazon now mahboula tshirt woman dancing amazon	Positive Coping	mindfullness practices		0	0	0.327	0	0.673	0.34	0	3	9	0	70	166	703	1	21	0
101	101	1.28111e+18	2020-07-09	Al-Mahboula_breathing Al-Mahboula is the sweetest of the best Al-Mahboula, dancing, clapping, good_morningᅠ Corona_Kuwait tcoiu wyigj	Al Mahboula	Eng. Sherin S	IF the world is hard just keep your head UP	al-mahboula_breathing al-mahboula sweetest best al-mahboula dancing clapping good_morning	Positive Coping	mindfullness practices		1	0.3	0.231	0	0.769	0.6369	0	0	2	0	70	166	703	1	6	0
100	100	1.28119e+18	2020-07-09	Al-Ahmadi and Jahra Corona tcojzgcmffmsb	Al Mahboula	الدلاقيستا - عمر	على شاطئ المطبخ نظرت دجاجةً	al-ahmadi jahra corona	Positive Coping	mindfullness practices		0	0	0	0	1	0	0	0	0	0	1708	812	63373	5	11	0
99	99	1.2815e+18	2020-07-10	To order a Mahboula Survivors T-shirt, Mahboula Corona_Kuwait, the price is approximately tcofoxrb t qd	Al Mahboula	Eng. Sherin S	IF the world is hard just keep your head UP	order mahboula survivors t-shirt mahboula corona_kuwait price approximately	Positive Coping	mindfullness practices		-0.4	0.6	0	0	1	0	0	1	5	1	70	166	703	1	8	0
697	697	1.28268e+18	2020-07-13	CNN says, 15k cases in one day from Florida, US. #OMG #CoronaVirus	Al Mahboula	Macir-i Babilyan		cnn says k cases in one day from florida us omg coronavirus	Negative Coping		venting of emotions	0	0	0	0	1	0	0	0	0	0	53	614	4148	0	14	1
266	266	1.28297e+18	2020-07-14	@AlMinbarAlDemo Thank you @AlMinbarAlDemo for your partnership in supporting our community in this Pandemic Situation🙏	Al Mahboula	Bdkq8official		alminbaraldemo thank you alminbaraldemo for your partnership in supporting our community in this pandemic situation pray	Positive Coping	mindfullness practices		0.25	0.25	0.265	0	0.735	0.6597	0	0	1	0	80	74	1312	0	9	0
98	98	1.28344e+18	2020-07-15	The account is sponsored by the photographer byjemii to photograph the products Sterilized containers Rolling on the floor from laughter Rolling on the floor from laughter mr_ahmat Our veins_with water funny comedy Laughter Jokes and funny people Comedy rock Abt Falla Amman Kuwait UAE Bahrain tcoblmcbnw by	Al Mahboula	Ahmad	•عشوائيات. •اب لطير من طيور الجنه •واب لملاكين جميلين H 👶🏼 M👶🏼	account sponsored photographer byjemii photograph products sterilized containers rolling floor laughter rolling floor laughter mr_ahmat veins_with water funny comedy laughter jokes funny people comedy rock abt falla amman kuwait uae bahrain	Positive Coping	mindfullness practices		0.25	1	0.365	0	0.635	0.9657	0	0	0	0	112	78	9181	0	16	0
696	696	1.28392e+18	2020-07-17	Acheni upumbavu,. Why should you lockdown counties? Myaleta food Kwa meza? Jeri mtuache tide na Corona instead. I hate you 😡 guys tu sana https://t.co/vw4b2mOCH4	Al Mahboula	Kimji Shauri	it's all about Jesus	acheni upumbavu why should you lockdown counties myaleta food kwa meza jeri mtuache tide na corona instead i hate you enraged face guys tu sana	Negative Coping		venting of emotions	-0.8	0.9	0	0.218	0.782	-0.7506	0	0	0	0	8	35	41	0	0	1
693	693	1.28423e+18	2020-07-17	So Russia hacked other countries covid research and now on pace to have an approved vaccine by mid August... That’s like that one person in the group that never shows up but take credit when the group get a good grade... lol	Al Mahboula	Vegas Robinson	Hokie Alumni....	so russia hacked other countries covid research and now on pace to have an approved vaccine by mid august thats like that one person in the group that never shows up but take credit when the group get a good grade lol	Positive Coping	mindfullness practices		0.34375	0.41875	0.278	0.038	0.685	0.912	0	0	11	0	524	691	9443	2	20	0
692	692	1.28423e+18	2020-07-17	@Nike I need some promo codes bc this covid 19 got a boy stressed... lol	Al Mahboula	Vegas Robinson	Hokie Alumni....	i need some promo codes bc this covid got a boy stressed lol	Positive Coping	mindfullness practices		0.8	0.7	0.173	0.148	0.679	0.1027	0	0	0	0	524	691	9443	2	20	0
694	694	1.28423e+18	2020-07-17	America looking like a real shit show right now... You got the Governor of Georgia suing the Mayor of Atlanta bc she requiring people to wear mask... 🤦🏾‍♂️🤷🏾‍♂️	Al Mahboula	Vegas Robinson	Hokie Alumni....	america looking like a real shit show right now you got the governor of georgia suing the mayor of atlanta bc she requiring people to wear mask man facepalming man shrugging	Positive Coping	mindfullness practices		-0.00714	0.767857	0.059	0.135	0.806	-0.4939	0	0	3	0	524	691	9443	2	20	0
695	695	1.28422e+18	2020-07-17	America the only country going back in forth about wearing mask... 😏😏😏	Al Mahboula	Vegas Robinson	Hokie Alumni....	america the only country going back in forth about wearing mask smirking face smirking face smirking face	Positive Coping	mindfullness practices		0	0.5	0	0	1	0	1	0	10	0	524	691	9443	2	20	0
97	97	1.28656e+18	2020-07-24	The company is licensed to disinfect and sterilize TCO C W PHJOQ	Al Mahboula	عقارات	عقارات	company licensed disinfect sterilize	Positive Coping	positive reframing		0	0	0	0	1	0	0	0	0	0	2	2	58	0	7	0
96	96	1.28712e+18	2020-07-25	Find the Corona vaccine	Al Mahboula	🚒Hashem🇰🇼	افْعَلُوا الخيرَ ولا تحقِرُوا منهُ شيْئاً !	find corona vaccine	Negative Coping		wishful thinking	0	0	0	0	1	0	0	0	0	0	210	182	9631	1	20	1
690	690	1.28751e+18	2020-07-26	thought of the day : corona spelled backwards. 🔔 https://t.co/LsqPPBpDan	Al Surra	🆁🅵🅼	👩‍🎓AUK’17 | CE 💻 | ☕️ | Scorpio | 🧡 الحمدلله |🐪💙| FCB💙❤️|	thought of the day corona spelled backwards bell	Positive Coping	positive reframing		0	0	0	0	1	0	0	0	1	0	184	278	6272	0	21	0
691	691	1.28746e+18	2020-07-26	CORONA Distance.. makes you know who's worth keeping and who's worth letting go.	Sabah Al Ahmad Marine City - Loloat Al Khairan	مها الياسين	Industrial Engineer- Kuwait Petroleum Corporation	corona distance makes you know whos worth keeping and whos worth letting go	Positive Coping	positive reframing		0.3	0.1	0.257	0	0.743	0.4215	1	0	0	0	361	310	12783	1	19	0
688	688	1.28787e+18	2020-07-27	Just realized I finished 18 paintings since quarantine started, working on 2, and will start one pretty soon. I’m proud.	Mubarak Al Kabeer	حصّــه هـادي الهــاجري	Medical doctor—RCSI | bonappe.tea | hajeriart | اللهم ارحم ابي حبيبي.	just realized i finished paintings since quarantine started working on and will start one pretty soon im proud	Positive Coping	engaging in relaxation techniques		0.525	1	0.283	0	0.717	0.743	0	0	0	0	985	488	28445	0	21	0
687	687	1.28789e+18	2020-07-27	Mask yourself.. say no to covidiotism..!! @ Al Salmiyah 12, https://t.co/mvGvg2RYhG	Al Salmiyah	Dr Idris	Family Medicine Physician//Past Chair - The Spice Route Movement-INDIA//Health IT enthusiast//Travel junkie//Health4All proponent//Love 2 read//Explorer//	mask yourself say no to covidiotism al salmiyah	Positive Coping	mindfullness practices		0	0	0	0.239	0.761	-0.296	0	0	1	0	571	273	2175	12	22	0
689	689	1.28771e+18	2020-07-27	corona is crying.	The Avenues	م	الحمدلله🤍	corona is crying	Positive Coping	mindfullness practices		-0.2	0.6	0	0.608	0.392	-0.4767	0	0	2	0	406	161	4641	0	11	0
686	686	1.28796e+18	2020-07-28	Fact: Why is it called a “Club Sandwich,” you ask? Because it was invented in a club! DUH! Now you got it, right? Let’s move on… 😆 Life in corona time 💔 #clubsandwich #eatlazycatkw @ Slider Station https://t.co/DpH8D8lN0O	The Sea Front	wainmaaro7	Restaurants and movies are my main interests. Check out my blog. اعشق كل طعام لذيذ, واحب متابعة الافلام الجميله. تابعو مدونتى #kuwait #food #wainmaaro7	fact why is it called a club sandwich you ask because it was invented in a club duh now you got it right lets move on grinning squinting face life in corona time broken heart clubsandwich eatlazycatkw slider station	Positive Coping	mindfullness practices		-0.1381	0.511905	0.146	0.068	0.786	0.5574	0	0	0	0	127	24	5108	15	4	0
685	685	1.28806e+18	2020-07-28	@ukinkuwait if I recovered from COVID and want to travel to the UK, am I still required to self-isolate?	Sabah Al Nasser	Faisal Alshlahi	General Surgery Resident @McMasterSurgery | @UofGlasgow Alumnus | Interests- General & Thoracic Surgery #MedEd #HealthPolicy #Leadership |🏴󠁧󠁢󠁳󠁣󠁴󠁿🇰🇼🇨🇦	if i recovered from covid and want to travel to the uk am i still required to selfisolate	Positive Coping	seeking social support		0	0	0.071	0	0.929	0.0772	0	1	0	0	1368	1420	2225	8	10	0
684	684	1.2906e+18	2020-08-04	@MahindraFin My name: vinod kumar mago Mob.9457633752(whatsapp) At present in Kuwait due to covid-19 . Dmat ac with IIFL 250 right issue of mmfl. Should i send cdsl and id of iifl	Al Mahboula	Vinod Mago		my name vinod kumar mago mobwhatsapp at present in kuwait due to covid dmat ac with iifl right issue of mmfl should i send cdsl and id of iifl	Positive Coping	seeking social support		0.053571	0.303571	0	0	1	0	0	2	0	0	1	22	264	0	10	0
95	95	1.29049e+18	2020-08-04	I swear to God, I will provide the Ministry of Health	Al Mahboula	طلال بن طواري	تجري الرياحُ كما تجري سفينتنا نحن الرياح و نحن البحر و السفنُ	swear god provide ministry health	Negative Coping		avoidance	0	0	0.171	0.098	0.732	0.2263	0	0	0	0	6159	425	19620	3	3	1
683	683	1.29234e+18	2020-08-09	One on one training course available for pandemic Promo only weekdays schedule... for inquire WhatsApp 🇰🇼 #99931174 #kuwaitartists #kuwaitinstructor #kuwaitmakeupartist #aesthetics #beautytrainingcourses… https://t.co/gw3CIK8BjY	Al Fintas	Emily Cabusao Abbott	the Top nail technician and the best nail artist in Kuwait. the Top blogger rating nail artist in Kuwait. make-up ans body tattoo artist.	one on one training course available for pandemic promo only weekdays schedule for inquire whatsapp kuwait kuwaitartists kuwaitinstructor kuwaitmakeupartist aesthetics beautytrainingcourses	Positive Coping	positive reframing		0.2	0.7	0	0	1	0	0	0	0	0	12	112	11579	0	5	0
682	682	1.29258e+18	2020-08-09	Going to get checked for corona because I'm way too sick ! #الله_كريم	Abu Ftaira	The Female Boss♡	Hybrid Maniac 🐶🥊 A ChupaKabra 🐉 الله يرحمك ابوي❤️	going to get checked for corona because im way too sick	Positive Coping	engaging in relaxation techniques		-0.71429	0.857143	0	0.248	0.752	-0.5106	0	0	0	0	446	373	46019	3	22	0
681	681	1.29261e+18	2020-08-09	Wearing coffee mask .. smells heaven 🌿	Abdullah Al Mubarak - West Jleeb	روان سالم الغضوري	#فلسطين_قضيتي إنما تحيا الفكرة . . إذا قوي الإيمان بها.	wearing coffee mask smells heaven herb	Positive Coping	engaging in relaxation techniques		0	0	0.398	0	0.602	0.5106	0	0	0	0	868	470	14829	1	23	0
678	678	1.29273e+18	2020-08-10	Current view - 6 more days of quarantine and then back to the outside world. Already back at work. Online teaching for another term. https://t.co/S4Ej6Hq21J	Al Mahboula	Nebby	Teacher, traveller and book reader.	current view more days of quarantine and then back to the outside world already back at work online teaching for another term	Positive Coping	positive reframing		0.1	0.19	0	0	1	0	0	0	1	0	30	77	50	0	7	0
679	679	1.29272e+18	2020-08-10	Corona sucks	Sabah Al Ahmad Marine City - Loloat Al Khairan	Azqz	KW - MI 🇺🇸	corona sucks	Negative Coping		venting of emotions	-0.3	0.3	0	0.714	0.286	-0.3612	0	0	0	0	127	218	1322	0	7	1
680	680	1.29272e+18	2020-08-10	My mood since corona started 😔 https://t.co/soMQX06NKV	Al Jabriyah	Fatima 🇸🇳	📍🇸🇳🇰🇼🇺🇸	my mood since corona started pensive face	Negative Coping		avoidance	0	0	0.178	0	0.822	0.0772	0	0	0	0	3179	1410	32145	2	6	1
677	677	1.29275e+18	2020-08-10	#Repost With this short two-minute survey we want to find out your opinion regarding the primary challenges Kuwait is facing, as a result of the COVID-19 pandemic. Your opinion matters in supporting Kuwait! @scpd_kw #Kuwait #COVID19 #Survey https://t.co/Isx4JT6flp https://t.co/vQbPWG5GoH	Kuwait	UNDP Kuwait	The official account of the United Nations Development Programme in Kuwait, supporting the accomplishment of the #SDGs by 2030. @UNDP	repost with this short twominute survey we want to find out your opinion regarding the primary challenges kuwait is facing as a result of the covid pandemic your opinion matters in supporting kuwait kuwait covid survey	Positive Coping	positive reframing		0.216667	0.35	0.171	0	0.829	0.5574	1	0	1	0	11917	602	4760	143	9	0
676	676	1.29313e+18	2020-08-11	@AndSind i am ex-staff and entitled for 250 right shares of Mahindra finance. My ac is with MEERUT hot samrat branch. Due to covid-19 i stuck in kuwait. I submitted my ASBA form to branch but bm shown her inability to process. From kuwait on whatsapp i msg	Al Mahboula	Vinod Mago		i am exstaff and entitled for right shares of mahindra finance my ac is with meerut hot samrat branch due to covid i stuck in kuwait i submitted my asba form to branch but bm shown her inability to process from kuwait on whatsapp i msg	Positive Coping	seeking social support		0.136905	0.586905	0.063	0.101	0.837	-0.4404	0	1	0	0	1	22	264	0	10	0
675	675	1.29343e+18	2020-08-12	@IIKNews Sir, all mobile no.mentioned in news are not replying. Seems these are hidden flights. No schedule of flight, no fare, no covid test requirements mentioned anywhere.	Al Mahboula	Vinod Mago		sir all mobile nomentioned in news are not replying seems these are hidden fs no schedule of f no fare no covid test requirements mentioned anywhere	Negative Coping		avoidance	-0.16667	0.333333	0.064	0.15	0.785	-0.3637	0	0	0	0	1	22	264	0	6	1
674	674	1.29383e+18	2020-08-13	@etihad for India can i take flight from Kuwait via Dubai or abudhabi. If yes, what covid-19 precautions should I follow.	Al Mahboula	Vinod Mago		for india can i take f from kuwait via dubai or abudhabi if yes what covid precautions should i follow	Positive Coping	seeking social support		0	0	0.124	0	0.876	0.4019	0	0	0	0	1	22	264	0	8	0
673	673	1.29422e+18	2020-08-14	@EtihadHelp i wish to go to india from kuwait via dubai or abudhabi. Is it possible and will there be any problem on account of covid-19?	Al Mahboula	Vinod Mago		i wish to go to india from kuwait via dubai or abudhabi is it possible and will there be any problem on account of covid	Positive Coping	seeking social support		0	1	0.095	0.095	0.81	0	0	0	0	0	1	22	264	0	10	0
672	672	1.29559e+18	2020-08-18	Expatriates celebrate the 74th Indian Independence Day in a unique way” Celebrated the 74th Indian independence day by organizing a blood donation camp at the Adan blood transfusion center on 13 th Aug. @KwBloodBank @KUWAIT_MOH #teamBDK_Q8 #togetherWeCan https://t.co/9LL9BssHRW	Al Mahboula	Bdkq8official		expatriates celebrate the th indian independence day in a unique way celebrated the th indian independence day by organizing a blood donation camp at the adan blood transfusion center on th aug	Positive Coping	engaging in relaxation techniques		0.208333	0.616667	0.198	0	0.802	0.8126	0	0	0	0	80	74	1312	0	5	0
671	671	1.29604e+18	2020-08-19	Back to gym day 2 completed with some explosive chest routine! Glives on, mask on, headsets on, SHUT UP and TRAIN! Managed to get my #benchpress to 80kgs after 5 months of bodyweight training💪 #iamthefitnessfreak… https://t.co/xEq57WC6Nq	Al Salmiyah	THE FITNESS FREAK	Just gettin used to tweeting....	back to gym day completed with some explosive chest routine glives on mask on headsets on shut up and train managed to get my benchpress to kgs after months of bodyweight training flexed biceps iamthefitnessfreak	Positive Coping	engaging in relaxation techniques		0	0	0	0	1	0	0	0	0	0	41	248	4970	2	11	0
670	670	1.29606e+18	2020-08-19	Not crazy about training with the mask, but...needs must 🥊 #Quarantine #Covid #MaskOn #MaskOff https://t.co/AcEu0MFBW1	The Capital	Robbie Scott روبي سكوت	Pro MMA Fighter (5 - 2), Personal Trainer, Coach, Musician, Information Addict, British in Arabia	not crazy about training with the mask butneeds must boxing glove quarantine covid maskon maskoff	Positive Coping	engaging in relaxation techniques		0.3	0.9	0.127	0	0.873	0.2584	0	1	2	0	266	332	18001	21	12	0
669	669	1.29606e+18	2020-08-19	I really wish they won’t stop the ‘car dine in’ after corona 😍	Al Mirqab	منيه المهيني	وَعَسَى أَنْ تَكْرَهُوا شَيْئًا وَهُوَ خَيْرٌ لَكُمْ 🤍	i really wish they wont stop the car dine in after corona smiling face with hearteyes	Positive Coping	mindfullness practices		0.2	0.2	0.377	0	0.623	0.7834	26	0	40	1	1399	262	4962	3	12	0
668	668	1.29607e+18	2020-08-19	@thedonq8 im gonna take number 2 also, why is batman there. technically he has no ability AND he is as smart as he is without the mask? excuse me	Abdullah Al Mubarak - West Jleeb	Fahad	I’m good at anything I do, and I do a lot of things.	im gonna take number also why is batman there technically he has no ability and he is as smart as he is without the mask excuse me	Positive Coping	mindfullness practices		0.054762	0.264286	0.133	0.105	0.762	0.2062	0	1	0	0	72	240	6947	0	12	0
665	665	1.29615e+18	2020-08-19	@EvertonInUSA @Everton Done. Renewed my International membership. Just won’t be able to pick up membership pack till back in the UK - whenever I’m allowed back without quarantine, #efc	Al Salmiyah	martin baines	Am proud Brit living in kuwait. Love all sport and follow everton for my sins. 1st game October 66. Hate divers love life	done renewed my international membership just wont be able to pick up membership pack till back in the uk whenever im allowed back without quarantine efc	Positive Coping	engaging in relaxation techniques		0.125	0.15625	0	0	1	0	0	0	1	0	148	260	1116	4	18	0
667	667	1.29607e+18	2020-08-19	Going to get checked for corona again...	Abu Ftaira	The Female Boss♡	Hybrid Maniac 🐶🥊 A ChupaKabra 🐉 الله يرحمك ابوي❤️	going to get checked for corona again	Positive Coping	engaging in relaxation techniques		0	0	0	0	1	0	0	0	0	0	446	373	46019	3	13	0
666	666	1.29608e+18	2020-08-19	if you stand by this and the way they’re forcing people out of their homes and breaking them down in the middle of a pandemic lmk! :) im tryna block your ass ❤️ https://t.co/ETDjdv8Pnp	Zahra	lilo	19 probably talking about shawarma factory kebab sandwiches	if you stand by this and the way theyre forcing people out of their homes and breaking them down in the middle of a pandemic lmk im tryna block your ass red heart	Negative Coping		venting of emotions	-0.05185	0.096296	0.103	0.158	0.739	-0.296	0	1	1	0	281	493	6503	1	13	1
664	664	1.29637e+18	2020-08-20	Corona Overload 😂💔	The Avenues	الڪوت ✨	فقد الأحبّة غربة 💔 صالح الڪوت ٣ نوفمبـر ٢٠٢٠ ¦ عـادل تقـي ٢٤ مـارس ٢٠٢١	corona overload face with tears of joy broken heart	Positive Coping	mindfullness practices		0.2	0.3	0.41	0.385	0.205	0.3612	0	0	0	0	60	305	50812	0	8	0
663	663	1.29646e+18	2020-08-20	Getting my first pro mani/pedi since this pandemic started.... HEAVEN	Candy Nails	Omega White 	Living, Learning, Loving...Beauty and a Beast! Your Boifriend's Best Friend Quintessential Gemini :)	getting my first pro manipedi since this pandemic started heaven	Positive Coping	engaging in relaxation techniques		0.25	0.333333	0.268	0	0.732	0.5106	0	0	1	0	536	865	64881	22	14	0
662	662	1.30106e+18	2020-09-02	Sweet yet bitter with a mask 😷 (@ The Viking Club SAS in Salwa, Al-Salmiyah Governorate) https://t.co/MLWLIYOb4N	Coast Strip A	💎	اللهم ارحم اخي 💔	sweet yet bitter with a mask face with medical mask the viking club sas in salwa alsalmiyah governorate	Positive Coping	mindfullness practices		0.083333	0.383333	0.138	0.128	0.734	0.0516	0	0	0	0	298	203	11686	0	7	0
661	661	1.30115e+18	2020-09-02	At Kuwait Airport procedure is simple, smooth and fast if we meet every requirement and guidlines issued like 14 days stay in nonbanned countries negative report and valid residency. You should have SHLONIK APP and register with your local number in kuwait after immediate arrival	Al Fahaheel	Fakhruddin Mitha		at kuwait airport procedure is simple smooth and fast if we meet every requirement and guidlines issued like days stay in nonbanned countries negative report and valid residency you should have shlonik app and register with your local number in kuwait after immediate arrival	Positive Coping	positive reframing		0.06	0.371429	0.078	0.076	0.845	-0.2263	0	0	3	0	31	840	18	0	13	0
660	660	1.30117e+18	2020-09-02	Waiting for #COVID__19 results is legit like innocent until proven guilty	Bayan	S.	I can’t really explain it I haven’t got the words	waiting for covid results is legit like innocent until proven guilty	Positive Coping	mindfullness practices		0	0.85	0.312	0.178	0.51	0.2732	0	0	1	1	123	45	4137	1	14	0
659	659	1.3012e+18	2020-09-02	@almari7a I’m not saying you should, I’m saying what’s the harm with a little more protection even if you’re not afraid, I know I’m not but I still wear it, I’m not as freaked out as I used to at the beginning of the pandemic that’s for sure 😆	Al Rumaithiya	Dooji ✰!	اللهم ارحم امي واغفر لها واسكنها فسيح جناتك 🙌🏻	im not saying you should im saying whats the harm with a little more protection even if youre not afraid i know im not but i still wear it im not as freaked out as i used to at the beginning of the pandemic thats for sure grinning squinting face	Positive Coping	positive reframing		0.278125	0.697222	0.15	0.04	0.81	0.7416	0	1	0	0	92	118	8440	3	16	0
658	658	1.3012e+18	2020-09-02	@almari7a Then I don’t really see what’s the big deal 😂 Although COVID can be symptom-less ☝🏻	Al Rumaithiya	Dooji ✰!	اللهم ارحم امي واغفر لها واسكنها فسيح جناتك 🙌🏻	then i dont really see whats the big deal face with tears of joy although covid can be symptomless index pointing up	Positive Coping	mindfullness practices		0.35	0.3	0.132	0.066	0.801	0.4404	0	1	0	0	92	118	8440	3	16	0
657	657	1.3012e+18	2020-09-02	@almari7a No, I myself am entirely not convinced, for someone who studied so very little on viruses and their nature I strongly believe that I wear my mask only to avoid sneezes and coughs, but I’m pretty sure the virus can find it’s way even if I’m home being careful so I’m not scared 🤣	Al Rumaithiya	Dooji ✰!	اللهم ارحم امي واغفر لها واسكنها فسيح جناتك 🙌🏻	no i myself am entirely not convinced for someone who studied so very little on viruses and their nature i strongly believe that i wear my mask only to avoid sneezes and coughs but im pretty sure the virus can find its way even if im home being careful so im not scared rolling on the floor laughing	Positive Coping	mindfullness practices		0.11994	0.84246	0.255	0.069	0.676	0.9386	0	1	0	0	92	118	8440	3	17	0
656	656	1.30138e+18	2020-09-03	A new morning. Freedom at the end of quarantine 😇 @ Palms Beach Club &amp; SPA https://t.co/p1bXY6OtZc	Coast Strip A	Murat Fadiloglu	In vino veritas...	a new morning freedom at the end of quarantine smiling face with halo palms beach club amp spa	Positive Coping	positive reframing		0.136364	0.454545	0.31	0	0.69	0.802	0	0	0	0	142	313	886	0	4	0
655	655	1.3014e+18	2020-09-03	Now, all that was just in two months. And you might say yeah the year ended so no more good shit happened in corona HAH. BUT not really, i have upgraded my PC twice this year and some may argue i didnt upgrade and just got myself a new pc. *cough cough* hamad *cough cough*	The Capital	Fahad	I’m good at anything I do, and I do a lot of things.	now all that was just in two months and you might say yeah the year ended so no more good shit happened in corona hah but not really i have upgraded my pc twice this year and some may argue i didnt upgrade and just got myself a new pc cough cough hamad cough cough	Positive Coping	mindfullness practices		0.057273	0.510909	0.026	0.155	0.819	-0.7816	0	1	0	0	72	240	6947	0	6	0
94	94	1.30328e+18	2020-09-08	We treated Covid, so can we treat the most dangerous and deadly virus with the same force, the opium of the people, the destroyer of homelands, the virus of fanaticism for the party, for the tribe, for the sect, for the doctrine tcoquttmwolnf	Al Mahboula	66135897Ghazi Aldous	‏. {السداسية الماسية} للتاسيس المبكر للغة العربية { سكر&عنب}	treated covid treat dangerous deadly virus force opium people destroyer homelands virus fanaticism party tribe sect doctrine	Negative Coping		self-blame	-0.075	0.48125	0.111	0.125	0.764	-0.1851	0	0	0	0	108	782	6786	0	10	1
93	93	1.30329e+18	2020-09-08	And We do not send signs to frighten you, and the soldiers of your Lord do not know, nor are they a reminder for human beings. Storms and floods, severe heat, diseases carried by animals and winds that come. Man knows and does not know. Viruses that are seen but not seen. Pandemic after pandemic and diseases that were in our ancestors through to the possessors of understanding. And for the oppres…	Al Mahboula	66135897Ghazi Aldous	‏. {السداسية الماسية} للتاسيس المبكر للغة العربية { سكر&عنب}	send signs frighten you soldiers lord know reminder human beings storms floods severe heat diseases carried animals winds come man knows know viruses seen seen pandemic pandemic diseases ancestors possessors understanding oppressors repent tyrants crush them	Negative Coping		self-blame	0	0.1	0	0.065	0.935	-0.5267	0	0	0	0	108	782	6786	0	11	1
92	92	1.30402e+18	2020-09-10	kuwait_moh Oh God, remove the epidemic and calamity from us	Al Mahboula	علي جابر عبد الله علي	موتي ولا دمعة امي	kuwait_moh oh god remove epidemic calamity us	Positive Coping	mindfullness practices		0	0	0.189	0	0.811	0.2732	0	1	3	0	213	1143	160	1	11	0
654	654	1.30396e+18	2020-09-10	Quarantine 7 days left	Al Mahboula	Dadan Munajat	Male	quarantine days left	Positive Coping	positive reframing		0	0	0	0	1	0	0	0	0	0	1	7	2	0	7	0
653	653	1.305e+18	2020-09-13	Day 12th for my quarantine	Al Mahboula	Dadan Munajat	Male	day th for my quarantine	Positive Coping	positive reframing		0	0	0	0	1	0	0	0	0	0	1	7	2	0	4	0
91	91	1.30587e+18	2020-09-15	Corona Mercy and Intimidation The Corona pandemic has incapacitated the world and revealed their weakness despite their stubbornness to the divine laws. The earth and the heavens are in them for God, and no animal moves and a leaf falls without God knowing it. Believers increase in faith and submission to God’s decree to enter His vast mercy, and you know what else they may be rewarded.	Al Mahboula	66135897Ghazi Aldous	‏. {السداسية الماسية} للتاسيس المبكر للغة العربية { سكر&عنب}	corona mercy intimidation corona pandemic incapacitated world revealed weakness despite stubbornness divine laws earth heavens god animal moves leaf falls without god knowing it believers increase faith submission god decree enter vast mercy know else may rewarded	Positive Coping	positive reframing		0	1	0.264	0.141	0.595	0.875	0	0	0	0	108	782	6786	0	13	0
652	652	1.30662e+18	2020-09-17	Next Event: Friday, 25 Sept; 9.00 AM to 1.00 PM Cooperative Center for Blood Transfusion, Al-Adan Kuwait. https://t.co/V6elWzErOn For registration, https://t.co/JaHWf4UCLC Camp is organised by adhering all Covid-19 protocols to ensure the safety of donors. @KwBloodBank https://t.co/opnm4yTW1Q	Al Mahboula	Bdkq8official		next event friday sept am to pm cooperative center for blood transfusion aladan kuwait registration is organised by adhering all covid protocols to ensure the safety of donors	Positive Coping	engaging in relaxation techniques		-0.05	0.05	0.172	0	0.828	0.6597	1	0	0	1	80	74	1312	0	15	0
651	651	1.30674e+18	2020-09-17	@the_hindu @ReallySwara @SrBachchan @BachchanJaya @republic so during the pandemic y hasn’t a celebrity of ur capacity done NOTHING to fight while actors such as Sonu Sood and Akshay Kumar are doing all they can they r true hero’s	Al Julayah - Al Zour - Sulah - Al Dubaiy	hemal	love music,movies,dance,wann to laugh our loud even in times of distress	so during the pandemic y hasnt a celebrity of ur capacity done nothing to fight while actors such as sonu sood and akshay kumar are doing all they can they r true heros	Positive Coping	engaging in relaxation techniques		0.175	0.575	0.195	0	0.805	0.7418	1	0	0	0	69	321	12639	3	23	0
650	650	1.3068e+18	2020-09-18	I suspect more COVID wards will open in hospitals all over Kuwait after this weekend 🦠💔🇰🇼	Al Sharq	حوراء حسن المتروك	ҫнакиоом 🧜🏻‍♀️ قل الحكي أحيان ... من كثر الإحساس	i suspect more covid wards will open in hospitals all over kuwait after this weekend microbe broken heart kuwait	Negative Coping		denial	0.033333	0.466667	0.165	0.208	0.627	-0.0258	0	0	2	0	1709	1273	37359	8	3	1
649	649	1.307e+18	2020-09-18	Sanitizer Machine Available Home Delivery 17.kd📞55701441 50719719 https://t.co/I3zlRk08Er	Al Salmiyah	Ahmed	💎ILU💎	sanitizer machine available home delivery kd telephone receiver	Positive Coping	positive reframing		0.4	0.4	0	0	1	0	2	0	2	0	16	244	32	1	16	0
648	648	1.30708e+18	2020-09-18	Am I an anti masker if I hate and don’t like putting on my mask? I do understand the importance of masks to be clear, but I hust really HATE IT!	Fnaitees	Nouf M Safar	Married. English teacher. In love with sad music, chips, and long walks. Interested in castle tourism, jewelry & art. My favorite color is gold.	am i an anti masker if i hate and dont like putting on my mask i do understand the importance of masks to be clear but i hust really hate it	Negative Coping		venting of emotions	-0.5	0.727778	0.09	0.279	0.631	-0.8174	0	1	2	0	2689	150	77122	7	22	1
644	644	1.30732e+18	2020-09-19	@arabtimeskuwait Peoples in iraq die more for other reasons that of coronavirus.	Khaitan	Mudasser Hossain		peoples in iraq die more for other reasons that of coronavirus	Negative Coping		denial	0.1875	0.4375	0	0.281	0.719	-0.5994	0	0	0	0	227	1609	1960	5	14	1
647	647	1.30723e+18	2020-09-19	@antissa @DanielAndrewsMP I’m sure the Premier has no such plans. Extra powers to police are necessary in a pandemic. Can we please stop seeing the pandemic as just an excuse for #vicpol to grab extra power? I’d rather be in Victoria right now than the UK, Spain or France. Some sane perspective please.	Al Salmiyah	Ross Appleby	Aussie Ex-pat, mad Collingwood fan, living in the desert.	im sure the premier has no such plans extra powers to police are necessary in a pandemic can we please stop seeing the pandemic as just an excuse for vicpol to grab extra power id rather be in victoria right now than the uk spain or france some sane perspective please	Negative Coping		wishful thinking	0.105102	0.453515	0.142	0.076	0.781	0.4215	0	1	0	0	151	178	1101	3	8	1
646	646	1.30726e+18	2020-09-19	@d_x37 The covid test ? 😅	Mishrif	Aziz.	Drummer 🥁 - Music lover 🎶🎸 - Video Gamer 🎮 / - *PSN*: ROOCKER	the covid test grinning face with sweat	Positive Coping	engaging in relaxation techniques		0	0	0.294	0	0.706	0.3612	0	1	0	0	331	390	17294	3	10	0
645	645	1.30732e+18	2020-09-19	Quarantine buddy ♥️ https://t.co/wVErt6JFbk	Al Khaldiya	سارا عبدالله المزعل	Senior English Desk Editor اللهم ارحم ابي و حبيبي بقدر ما تمنيت له البقاء و اكثر	quarantine buddy heart suit	Positive Coping	positive reframing		0	0	0.583	0	0.417	0.6369	0	1	0	0	790	191	21139	4	14	0
90	90	1.30803e+18	2020-09-21	I think I'm more of a person who wiped a swab when Corona started	Al Mahboula	﮼حَوّرآءْ	Chemical engineer |♏️اللهم ارحم صديقة دربي افنان الكندري	think i'm person wiped swab corona started	Positive Coping	mindfullness practices		0.5	0.5	0	0	1	0	0	0	0	0	122	113	5049	0	13	0
89	89	1.30863e+18	2020-09-23	With all confidence, I enter the school and wait for the guard to take the temperature, and I am silent while I am waiting. Suddenly I say, I forgot to wear a mask. I disfigure myself that I have understood, and I am failing. He tells me, “God loves me,” to step down.	Al Mahboula	دانا	https://t.co/DrMzFcNH1C	confidence enter school wait guard take temperature silent waiting suddenly say forgot wear mask disfigure understood failing tells me god loves me step down	Positive Coping	mindfullness practices		-0.05185	0.296296	0.116	0.055	0.829	0.5719	0	0	0	0	907	460	23476	2	4	0
88	88	1.30978e+18	2020-09-26	Corona has left me in Ibn Battuta, Kuwait branch. It is impossible for me to go out at four o’clock. It is rare for Corona to begin, and I feel like I have not left an area I came to.	Al Mahboula	حامد الشمري	"بفضل الله طيبين وماعلينا خلاف" 👷‍♂️civil eng	corona left ibn battuta kuwait branch impossible go four o’clock rare corona begin feel left area came to	Positive Coping	engaging in relaxation techniques		-0.09167	0.475	0.06	0	0.94	0.3612	0	0	0	0	2446	442	86088	5	8	0
87	87	1.3098e+18	2020-09-26	For two bites, he said to his wife, “Your cooking today is delicious.” She got up and called the Corona team. They came with the ambulance and his puppy. They said, “Sir, your wife has lost your sense of taste, and this is a sure sign of Corona. Cool, and you are silent without negative criticism. You praise your wife’s food and say, God bless you, otherwise Corona tcomc sylcxcj.”	Al Mahboula	66135897Ghazi Aldous	‏. {السداسية الماسية} للتاسيس المبكر للغة العربية { سكر&عنب}	two bites said wife your cooking today delicious got called corona team came ambulance puppy said sir wife lost sense taste sure sign corona cool silent without negative criticism praise wife food say god bless you otherwise corona	Positive Coping	mindfullness practices		0.31	0.607778	0.223	0.028	0.749	0.9349	0	0	0	0	108	782	6786	0	10	0
641	641	1.3139e+18	2020-10-07	You can’t tell but we’re smiling under the masks. 😆😁 @ Earth Roastery https://t.co/i8RJegcF2T	Coast Strip A	EARTH ROASTERY	Down to earth, to reach the highest	you cant tell but were smiling under the masks grinning squinting face beaming face with smiling eyes earth roastery	Positive Coping	mindfullness practices		0	0	0.413	0	0.587	0.9052	0	0	0	0	88	7	181	1	17	0
640	640	1.31394e+18	2020-10-07	@Delta Nowhere at all⁉️ Just stick to where you are‼️ Frankly nowadays is so risky to fly, and from the beginning of your journey, either you get infected from the passenger in the waiting hall or inside the ✈️ And imagine while you are abroad, and you catch #Covid_19 ‼️	Kuwait	Muhammad Habib Bushehri بوحسين	كاتب صحفي ومحاضر كويتي🇰🇼مستقل ومدير سابق لدورات اللغة في بريطانيا Kuwaiti Journalist-writer-lecturer & previous English language Admin manger at the UK	nowhere at all exclamation question mark just stick to where you are double exclamation mark frankly nowadays is so risky to fly and from the beginning of your journey either you get infected from the passenger in the waiting hall or inside the airplane and imagine while you are abroad and you catch covid double exclamation mark	Negative Coping		venting of emotions	0.266667	0.3	0	0.092	0.908	-0.6774	0	0	0	0	1177	60	7888	12	20	1
642	642	1.31389e+18	2020-10-07	You can’t tell but we’re smiling under the masks. 😆😁 @ Earth Roastery https://t.co/YHCBWqsxD3	Coast Strip A	EARTH ROASTERY	Down to earth, to reach the highest	you cant tell but were smiling under the masks grinning squinting face beaming face with smiling eyes earth roastery	Positive Coping	mindfullness practices		0	0	0.413	0	0.587	0.9052	0	0	0	0	88	7	181	1	17	0
643	643	1.31379e+18	2020-10-07	Boursa Kuwait Investor Relations Director Fahad AlBesher took part in a panel discussion, which shed light on the swift actions taken by the exchange throughout the pandemic.	Al Sharq	Boursa Kuwait | بورصة الكويت	Welcome to Boursa Kuwait, striving to lead an efficient and transparent capital market. For more information, please contact us on: info@boursakuwait.com.kw	boursa kuwait investor relations director fahad albesher took part in a panel discussion which shed on the swift actions taken by the exchange throughout the pandemic	Positive Coping	positive reframing		0.4	0.7	0.065	0	0.935	0.2023	0	1	1	0	17939	0	42439	131	10	0
639	639	1.31407e+18	2020-10-08	More nonCOVID cases More COVID cases Many cases incidentally found to have COVID Many elderly patients are passing away due to COVID or complications of COVID 🦠💔🇰🇼	Al Sharq	حوراء حسن المتروك	ҫнакиоом 🧜🏻‍♀️ قل الحكي أحيان ... من كثر الإحساس	more noncovid cases more covid cases many cases incidentally found to have covid many elderly patients are passing away due to covid or complications of covid microbe broken heart kuwait	Negative Coping		venting of emotions	0.245833	0.4625	0.119	0.088	0.793	0.2732	2	0	2	0	1709	1273	37359	8	5	1
638	638	1.3143e+18	2020-10-08	Fight Corona with a drink 😋 https://t.co/spznISUzB8	قرية جالبوت | Jalboot Village	زغنبوط	‏‏‏‏‏‏‏‏‏‏‏‏‏‏‏‏‏‏‏‏‏‏‏‏‏عند الساعة 11:20 من صباح يوم الخميس 16/11/2017 انتهى كل شيء جميل عندما فارقت روح والدتي الطاهرة الحياة ❤	fight corona with a drink face savoring food	Positive Coping	positive reframing		0	0	0	0.271	0.729	-0.3818	0	0	0	0	4008	143	90128	0	20	0
637	637	1.31453e+18	2020-10-09	Fight Corona with Sports ⛷️ https://t.co/BYCtcPOuu9	Chalet Prestige	زغنبوط	‏‏‏‏‏‏‏‏‏‏‏‏‏‏‏‏‏‏‏‏‏‏‏‏‏عند الساعة 11:20 من صباح يوم الخميس 16/11/2017 انتهى كل شيء جميل عندما فارقت روح والدتي الطاهرة الحياة ❤	fight corona with sports skier	Positive Coping	positive reframing		0	0	0	0.394	0.606	-0.3818	0	0	0	0	4008	143	90128	0	11	0
636	636	1.32151e+18	2020-10-28	Social Distancing https://t.co/LRKkpgixGT	Bneid Al Qar	Ali Azmat Malik	Self Contentment, Regional Product Manager @ WB Technologies Roaming around Kuwait 🇰🇼 Qatar 🇶🇦 UAE 🇦🇪 KSA 🇸🇦 & Bahrain 🇧🇭, Pakistan 🇵🇰 is my love	social distancing	Positive Coping	problem-solving		0.033333	0.066667	0	0	1	0	0	0	0	0	99	514	2669	0	17	0
635	635	1.32152e+18	2020-10-28	#مانبي_امتحانات_ورقيه You are responsible if something happens to us In one you were told that high school students Against Corona?	South West Sulibikhat	ً	♉︎	you are responsible if something happens to us in one you were told that high school students against corona	Negative Coping		venting of emotions	0.18	0.545	0.113	0	0.887	0.3182	0	0	2	0	299	57	5787	0	18	1
633	633	1.32215e+18	2020-10-30	Writing a corona post 🦠	Al Shuhada	حوراء حسن المتروك	ҫнакиоом 🧜🏻‍♀️ قل الحكي أحيان ... من كثر الإحساس	writing a corona post microbe	Positive Coping	engaging in relaxation techniques		0	0	0	0	1	0	0	0	1	0	1709	1273	37359	8	11	0
634	634	1.32208e+18	2020-10-30	THE Mask WAR Between The The Two Party Some Thing Amazing ?.	Bneid Al Qar	ameen qasem	Holding A Bachelor Degree in Science At The University Of Pittsburgh Pa 15213.working as Director of A Transportation. Company in Kuwaiti since 1990.	the mask war between the the two party some thing amazing	Positive Coping	mindfullness practices		0.6	0.9	0.353	0.212	0.435	0.3818	0	0	0	0	7	7	690	0	7	0
632	632	1.32241e+18	2020-10-31	MORNING TO ALL IMBECILES WHO TAKE PICTURES WITHOUT A MASK 😷 love is absolute truth and the ultimate power to be free...🤍♥️ the less we talk, the less i care 🤍♥️and that’s for anybody #love #and #smile #HappyHalloween2020 #Halloween2020 #HalloweenAtHome https://t.co/gLa3LnjXNm	Sabah Al Salem	الدكتور أحمد بن محمد نيازي 🧢	💙دكتور طبيب أسنان في إداره تعزيز الصحه وزاره الصحه دوله الكويت 🇰🇼محاضر في معهد التمريض بالمعاهد التطبيقية ♥️ عَلَى ٱللَّهِ تَوَكَّلْنَا☪️ يُدَبِّرُ الْأَمْرَ	morning to all imbeciles who take pictures without a mask face with medical mask love is absolute truth and the ultimate power to be free white heart heart suit the less we talk the less i care white heart heart suit and thats for anybody love and smile happyhalloween halloween halloweenathome	Negative Coping		venting of emotions	0.142424	0.375758	0.469	0	0.531	0.9893	0	0	1	0	1013	4941	16474	1	5	1
631	631	1.32253e+18	2020-10-31	@JakeOKane I think the mandate to wear a mask has been the way of the dodo for quite some time.	Al Salmiyah	Stuart McCall	Proud to be from Norn Iron and support #GAWA love the Chelsea.	i think the mandate to wear a mask has been the way of the dodo for quite some time	Positive Coping	mindfullness practices		0	0	0	0	1	0	0	0	0	0	106	322	10867	1	13	0
86	86	1.32508e+18	2020-11-07	Contact virus: I gave birth to a puppy with a group of cats for a long time, and I found it imprinting with its nature and it became dry. Does this apply to humans? Perhaps, for example, if someone lives with mangy, he will be infected with scabies. Whoever lives with the disease deteriorates, intended to draw understanding. tcovz n f qwy	Al Mahboula	66135897Ghazi Aldous	‏. {السداسية الماسية} للتاسيس المبكر للغة العربية { سكر&عنب}	contact virus gave birth puppy group cats long time found imprinting nature became dry apply humans perhaps example someone lives mangy infected scabies whoever lives disease deteriorates intended draw understanding	Negative Coping		venting of emotions	-0.05833	0.5	0	0.05	0.95	-0.4939	0	0	0	0	108	782	6786	0	14	1
630	630	1.32546e+18	2020-11-08	When your maid runs away during a pandemic 🙄	Al Shuhada	حوراء حسن المتروك	ҫнакиоом 🧜🏻‍♀️ قل الحكي أحيان ... من كثر الإحساس	when your maid runs away during a pandemic face with rolling eyes	Positive Coping	mindfullness practices		0	0	0	0	1	0	0	6	2	0	1709	1273	37359	8	15	0
629	629	1.32547e+18	2020-11-08	Quarantine is over https://t.co/EvVJpPDHgQ	Al Sharq	عبدالرحمن العلي	Mechanical Engineer.	quarantine is over	Positive Coping	positive reframing		0	0	0	0	1	0	0	1	0	0	56	82	6912	1	16	0
628	628	1.32551e+18	2020-11-08	Today I hugged my mom for the first time in 8 months. Absolutely hate this pandemic	Al Salam	noorah		today i hugged my mom for the first time in months absolutely hate this pandemic	Negative Coping		wishful thinking	-0.275	0.616667	0.137	0.203	0.66	-0.3167	0	0	1	0	352	467	27286	0	18	1
627	627	1.32578e+18	2020-11-09	Corona time is kind of becoming my comfort zone that I don’t really want to leave.	Bneid Al Qar	سيد إسماعيل بهبهاني 🇰🇼🇵🇸	باحث دكتوراة في الدراسات العربية والإسلامية - أعمل في مجال الثّقافة - أحب الحمّص والaçai. صدر لي: 'وحوش القصيدة' و'استباق أصل الأنواع' (دار آفاق) #البدون_أولوية	corona time is kind of becoming my comfort zone that i dont really want to leave	Positive Coping	mindfullness practices		0.416667	0.65	0.136	0.158	0.706	0.1525	0	0	0	0	4356	501	118709	38	12	0
626	626	1.32604e+18	2020-11-10	A vaccine jointly developed by Pfizer and BioNTech has 90 percent effectiveness in preventing Covid-19 :Report https://t.co/GzrD6nImOY	Al Mahboula	Shrafk Mangalore	Safety Engineer/ Writers/ journalist/ Social Works/Novelists/Comedian/Muslim	a vaccine jointly developed by pfizer and biontech has percent effectiveness in preventing covid report	Positive Coping	positive reframing		0.1	0.3	0	0.073	0.927	-0.0258	0	0	0	0	154	623	981	0	5	0
85	85	1.32662e+18	2020-11-11	Ministry of Health employees. I know if this was intentional or what exactly. Most employees had their salaries cut during the Corona period. Allowances tcomyqxq jljj	Al Mahboula	abdulaziz almouli	ارسنالي .... ❤️ Arsenal @arsenal	ministry health employees know intentional exactly employees salaries cut corona period allowances	Negative Coping		denial	0.5	0.5	0	0.077	0.923	-0.2732	3	2	2	0	335	372	7453	0	19	1
625	625	1.32768e+18	2020-11-14	Corona +ve get away from me 👀!! https://t.co/P4pY38hpwn	Al Shuhada	AJ	~ اللهم ارحم امي رحمة واسعة ~ Civil Engineering Student | Racer	corona ve get away from me eyes	Positive Coping	mindfullness practices		0	0	0	0	1	0	0	0	0	0	407	282	6512	2	18	0
624	624	1.32789e+18	2020-11-15	WION Wideangle: Mink Coronavirus: Another deadly outbreak? https://t.co/A2MERVZXUP via @YouTube	Kuwait	𝕐𝕠𝕦𝕤𝕖𝕗 ℙ	𝕌𝕟𝕓𝕚𝕒𝕤𝕖𝕕	wion wideangle mink coronavirus another deadly outbreak via	Negative Coping		venting of emotions	-0.2	0.4	0	0	1	0	0	0	0	0	25	67	374	0	8	1
623	623	1.3283e+18	2020-11-16	#USA democracy in shambles. Dictatorship is looming . #Trump’s White supremacists and #Corona virus are leading transitions	Ashbeliah	Atallah A. Alghunaiman	Engineer,businessman and good human being.Our world today is a wild jungle and I sadly have doubt that Arabs would continue to exist as a nation in next century	usa democracy in shambles dictatorship is looming trumps white supremacists and corona virus are leading transitions	Negative Coping		venting of emotions	0	0	0	0.2	0.8	-0.3612	0	0	0	0	143	255	6466	0	11	1
622	622	1.32834e+18	2020-11-16	Second Vaccine just announced 🥳	Al Khaldiya	بدر الظفيري	“A person who never made a mistake never tried anything new.” (Albert Einstein) My instagram account @ilbedry .. Gust MBA '17 .. KU '09 🇰🇼	second vaccine just announced partying face	Positive Coping	positive reframing		0	0	0.342	0	0.658	0.3818	0	0	0	0	1062	294	14739	2	14	0
621	621	1.32835e+18	2020-11-16	Even though when your smile under the mask smile..😁💙	Al Salmiyah	شـريـفـة الـكـندري	Chemical Engineer.👩🏻‍🔬	even though when your smile under the mask smile beaming face with smiling eyes blue heart	Positive Coping	mindfullness practices		0.2	0.1	0.504	0	0.496	0.9042	0	0	0	0	143	121	4383	0	14	0
84	84	1.32876e+18	2020-11-17	dkhon tareemed, he is dead, Corona will go, he will rise like a horse, smile	Al Mahboula	💜🇰🇼صديق البحر🇪🇬💜	‏‏‏‏‏‏‏ما بين منطوق لم يقصد ومقصود لم ينطق تضيع كثير من المحبه	dkhon tareemed dead corona go rise horse smile	Positive Coping	mindfullness practices		0.05	0.25	0.235	0.202	0.563	-0.0772	0	1	2	0	250	373	6208	0	18	0
620	620	1.33012e+18	2020-11-21	It is fair call to resident wear mask properly But CM gathering photo shoot without wearing mask https://t.co/hsS8gifw3x	Al Mahboula	muhammadarif		it is fair call to resident wear mask properly but cm gathering photo shoot without wearing mask	Positive Coping	mindfullness practices		0.35	0.5	0.084	0.157	0.759	-0.3506	0	0	0	0	64	269	733	0	12	0
619	619	1.3317e+18	2020-11-25	It’s Hard to be Sad When You are Eating a Cookie 🍪. @thinners_kw #cooking #love #covid_19 #cafe @ The Hub Kuwait https://t.co/vGtTzulZl4	Al Sharq	جَ🌴	I'm not good but better than others ..💜	its hard to be sad when you are eating a cookie cookie cooking love covid cafe the hub kuwait	Positive Coping	engaging in relaxation techniques		-0.09722	0.713889	0.17	0.182	0.648	0.1779	0	0	0	0	27178	4265	116620	19	20	0
618	618	1.33239e+18	2020-11-27	8 months recall Healed The patient is happy and Asymptomatic .. The patient didnt crown his tooth due to the pandemic, so he was referred again for a 👑 @ The Hub Kuwait https://t.co/9IHMPx31Vt	Al Sharq	د. محمد الشمري	BDS🇯🇴 MFD-RCSI🇮🇪 KB-GENERAL DENTISTRY🇰🇼 KB-ENDODONTICS YR5 🇰🇼 دراسات عليا بالبورد الكويتي👨🏻‍⚕️ تخصص علاج العصب 🦷 ☎️ للمواعيد: 99663680💍🤍	months recall healed the patient is happy and asymptomatic the patient didnt crown his tooth due to the pandemic so he was referred again for a crown the hub kuwait	Positive Coping	positive reframing		0.3375	0.6875	0.113	0	0.887	0.5719	0	0	0	0	1105	313	15980	8	18	0
617	617	1.33262e+18	2020-11-28	I don’t want to wear a mask anymore🥺	Qortuba	Lamyaa		i dont want to wear a mask anymore pleading face	Negative Coping		venting of emotions	0	0	0	0.12	0.88	-0.0572	1	1	1	1	526	492	24131	1	9	1
616	616	1.33297e+18	2020-11-29	I want Marvel Mask! 🙂	Al Rumaithiya	Sarah AlSayegh سارة الصايغ	مصورة محترفة في صحيفة كويت نيوز @KuwaitNews، ومهتمة في صناعة الأخبار الاقتصادية وتقنية المعلومات. Journalist @KuwaitNews	i want marvel mask sly smiling face	Positive Coping	mindfullness practices		-0.16667	0.166667	0.63	0	0.37	0.701	0	0	0	0	9147	561	139741	111	8	0
615	615	1.33344e+18	2020-11-30	@WHO @DrTedros Corona plot we do not want a slice	Al Mahboula	محمد باحماد💓🇲🇦🇲🇦❤️🇰🇼	‏‏‏‏‏محمد باحماد مغربي🇲🇦❤️❤️🇰🇼	corona plot we do not want a slice	Negative Coping		denial	0	0	0	0.149	0.851	-0.0572	0	0	2	0	49	207	691	0	16	1
614	614	1.33353e+18	2020-11-30	@jimmyfallon Baby, it’s Covid Outside! #AddAWordRuinAChristmasSong	Abu Halifa	Toni Cabugao ⁷		baby its covid outside addawordruinachristmassong	Positive Coping	mindfullness practices		0	0.05	0	0	1	0	0	0	0	0	33	188	477	0	21	0
613	613	1.33372e+18	2020-12-01	Feels like #Quarantine day 100	Al Jabriyah	❥Linda	𓂆 •• #instagram ➛ @drlindaalasfour	feels like quarantine day	Negative Coping		venting of emotions	0	0	0.455	0	0.545	0.3612	0	0	1	0	132	102	2140	0	10	1
612	612	1.33373e+18	2020-12-01	I Am Ready For India Traveling Coronavirus Test Has Been Done PCR Certificate Has Arrived! 💕 #kuwaiti #kuwaitcity #kuwaitphoto #kuwaity #kuwaitfashion #kuwaitpic #kuwaitfood #kuwaityat #kuwaitinstgram #kuwaitinsta #kuwaitpho #kuwaitstyle #i_m_ahad_khan #ahadkhanofficial https://t.co/VFL2OBljmG	Al Jahra	Ahad Khan	Dark Side Of The Moon!	i am ready for india traveling coronavirus test has been done pcr certificate has arrived two hearts kuwaiti kuwaitcity kuwaitphoto kuwaity kuwaitfashion kuwaitpic kuwaitfood kuwaityat kuwaitinstgram kuwaitinsta kuwaitpho kuwaitstyle i m ahad khan ahadkhanofficial	Positive Coping	engaging in relaxation techniques		0.2	0.5	0.175	0	0.825	0.7783	0	0	1	0	541	4993	2714	2	11	0
611	611	1.33388e+18	2020-12-01	Pharma giants control the #Covid #vaccine patents, driving up their profits and restricting supply to a few rich countries. But in days governments will vote on a plan to suspend #patents so the whole world can benefit. Let's make sure it passes! Join in: https://t.co/aIcEE7mFjV	Al Salmiyah	Harj Salipada	▲ INDECISIVE ▲	pharma giants control the covid vaccine patents driving up their profits and restricting supply to a few rich countries but in days governments will vote on a plan to suspend patents so the whole world can benefit lets make sure it passes join in	Positive Coping	engaging in relaxation techniques		0.21875	0.534722	0.233	0.087	0.68	0.7876	0	0	0	0	345	122	3014	3	21	0
609	609	1.33413e+18	2020-12-02	Covid really fucked the conception of time these past 9 months😂	Al Shuhada	Moha		covid really fucked the conception of time these past months face with tears of joy	Positive Coping	mindfullness practices		-0.01667	0.383333	0.17	0.294	0.536	-0.4201	0	0	0	0	153	280	13449	1	13	0
608	608	1.33426e+18	2020-12-02	pandemic p was horrible in the playoffs now people “hate him”. stop it	Aeraifjan	TV	sys admin 👨🏾‍💻| somewhere drinking water & minding my business	pandemic p was horrible in the playoffs now people hate him stop it	Negative Coping		venting of emotions	-0.9	0.95	0	0.485	0.515	-0.8555	0	0	0	0	3102	1379	115810	7	21	1
610	610	1.33408e+18	2020-12-02	@fatma_alazmi @KUWAIT_MOH Recently we published a paper “Analysis of the outbreak of the novel coronavirus Covid-19 dynamic model with control mechanisms” where we emphasized the effort of health institutions. Thanks to all of them 👏	Doha Residential	Fatma Bozkurt	Academic / Prof. Dr.	recently we published a paper analysis of the outbreak of the novel coronavirus covid dynamic model with control mechanisms where we emphasized the effort of health institutions thanks to all of them clapping hands	Positive Coping	positive reframing		0.066667	0.205556	0.201	0	0.799	0.7783	0	0	0	0	1787	444	16152	9	10	0
607	607	1.33458e+18	2020-12-03	This quarantine was the last thing I needed	Al Jabriyah	روان	lazy perfectionist	this quarantine was the last thing i needed	Negative Coping		venting of emotions	0	0.066667	0	0	1	0	0	1	0	0	372	274	13075	1	19	1
606	606	1.33458e+18	2020-12-03	You can’t even get people to wear a mask, so how you going to get them to take a vaccine...	Al Mahboula	Vegas Robinson	Hokie Alumni....	you cant even get people to wear a mask so how you going to get them to take a vaccine	Negative Coping		avoidance	0	0	0	0	1	0	0	0	0	0	524	691	9443	2	19	1
605	605	1.33675e+18	2020-12-09	@LadyVelvet_HFQ It's too much horrible for corona patients	Al Mangaf	Amjad Ali Ansari	🇮🇳I like people who live for humanity, there is a strong hatred towards people who live for themselves only and only for themselves🇰🇼	its too much horrible for corona patients	Negative Coping		venting of emotions	-1	1	0	0.368	0.632	-0.5423	0	0	0	0	17	292	268	0	19	1
604	604	1.33762e+18	2020-12-12	Regardless of the controversial opinions regarding #CovidVaccines . Let’s take a step back and thank those scientists for their hard work. Docs were praised for saving lives in this pandemic, while scientist worked those same hours to prevent this pandemic from happening again 🙏🏼	Al Salam	Rawan Alraish	@ChariteBerlin medical graduate @amirihospital Medical doctor seeking for self-development... working for a better tomorrow... encouraging innovation.	regardless of the controversial opinions regarding covidvaccines lets take a step back and thank those scientists for their hard work docs were praised for saving lives in this pandemic while scientist worked those same hours to prevent this pandemic from happening again folded hands	Positive Coping	mindfullness practices		0.064583	0.404167	0.131	0.062	0.808	0.5574	0	0	0	0	121	386	611	0	4	0
83	83	1.33769e+18	2020-12-12	He reads the requirements for the Corona vaccine and its outcomes. He realizes that it is a conspiracy at the beginning, and the judiciary understands a large part of humanity, especially the family, the Davos Population Conference, not to have children again, and it is given to those of eighty years as if it were a mercy vaccine. Woe to the enemies of humanity.	Al Mahboula	66135897Ghazi Aldous	‏. {السداسية الماسية} للتاسيس المبكر للغة العربية { سكر&عنب}	reads requirements corona vaccine outcomes realizes conspiracy beginning judiciary understands large part humanity especially family davos population conference children again given eighty years mercy vaccine woe enemies humanity	Negative Coping		denial	0.107143	0.714286	0.035	0.131	0.834	-0.7845	0	0	0	0	108	782	6786	0	9	1
603	603	1.33856e+18	2020-12-14	Would you still take the Corona Vaccine after watching the ending to this Corona Movie Trailer? 🤔 #coronavirus #CovidVaccine https://t.co/BWFyRPAFAc	Qortuba	Mohammed AlNashmi	Filmmaker/Director🇰🇼 ... I don’t use twitter alot, find me on instagram: malnashmi 👇🏽	would you still take the corona vaccine after watching the ending to this corona movie trailer thinking face coronavirus covidvaccine	Negative Coping		denial	0	0	0	0	1	0	0	0	0	0	1294	414	11738	1	19	1
82	82	1.33987e+18	2020-12-18	waleedalghanim kwt_awqaf kuwait_moh Bukhaled, your words are true. The market chapels were opened for information.	Al Mahboula	Ali Alduaij	Mechanical Engineer working @ Kuwait Oil Company Truth Seeker and proud to be Muslim. I'm in Kuwait City - Istanbul	waleedalghanim kwt_awqaf kuwait_moh bukhaled words true market chapels opened information	Positive Coping	mindfullness practices		0.35	0.65	0.167	0	0.833	0.4215	0	1	0	0	194	262	6702	7	9	0
602	602	1.34055e+18	2020-12-20	@FahdAlMulla If the vaccine has the RNA sequence of the conserved region of the spike protein, the vaccine would still be effective. Wouldn’t it?	Hawalli	Mira Bosso	https://t.co/Pe6AccyC81.(pathology) Currently #research_tech @usask 🇨🇦 🍁, formerly sr. RA at Kuwait University	if the vaccine has the rna sequence of the conserved region of the spike protein the vaccine would still be effective wouldnt it	Positive Coping	seeking social support		0.6	0.8	0.124	0	0.876	0.4767	0	0	0	0	691	1361	3039	3	6	0
601	601	1.34064e+18	2020-12-20	@BorgerPieter I don’t agree. RNA vaccines are degraded. However, if you get infected with corona virus, you have more solid chances that the viral RNA is integrated into your DNA ( because it needs to replicate ) and will make changes to your DNA. @HayatAlyaqout	Hawalli	Mira Bosso	https://t.co/Pe6AccyC81.(pathology) Currently #research_tech @usask 🇨🇦 🍁, formerly sr. RA at Kuwait University	i dont agree rna vaccines are degraded however if you get infected with corona virus you have more solid chances that the viral rna is integrated into your dna because it needs to replicate and will make changes to your dna	Negative Coping		denial	0.25	0.3	0.083	0.169	0.749	-0.6296	0	0	5	0	691	1361	3039	3	12	1
600	600	1.34078e+18	2020-12-20	COVID-20 ??🤯🤯🤯	Al Rawda	منيرة أسعد الشرهان	KU graduate|Political Scinese اللهم اكفني شر خلقك ولا تجعل همي اتفه عبادك 28.8.18💍💘	covid exploding head exploding head exploding head	Negative Coping		venting of emotions	0	0	0	0	1	0	0	0	0	0	265	264	6089	0	21	1
596	596	1.34103e+18	2020-12-21	Covid 20 session finally	Qortuba	Abdullatif AlADWANI	عظيم ذاك الوقت ... منصف / Jacopo is the man	covid session finally	Positive Coping	mindfullness practices		0	1	0	0	1	0	0	0	0	0	613	343	35619	15	14	0
597	597	1.34099e+18	2020-12-21	The year 2020 is about to end and here comes Covid20 🤣 #كوفيد_20 #COVID20 https://t.co/vm75cltfCT	Al Jabriyah	Saleh Al Duaij	لكل داء دواء يستطب به إلا الحماقة أعيت من يداويها	the year is about to end and here comes covid rolling on the floor laughing covid	Positive Coping	mindfullness practices		0	0	0.176	0	0.824	0.4939	0	1	0	0	717	408	11226	1	11	0
595	595	1.34103e+18	2020-12-21	Welcome to the world Covid-20😇	Al Jahra	عـمـر أحمد الـزامـل	Mechanical Engineer 👷‍♂️⚙️, @livuni Alumnus 👨🏻‍🎓	welcome to the world covid smiling face with halo	Positive Coping	mindfullness practices		0.8	0.9	0.462	0	0.538	0.7184	0	0	0	0	904	867	53602	7	14	0
599	599	1.34085e+18	2020-12-21	The universe has a bizarre sense of humor #covid_20	Salwa Block 12	💬 أحمد	solo con te sempre per te ⚫️🔴 👷🏻‍♂️MSCE	the universe has a bizarre sense of humor covid	Positive Coping	mindfullness practices		0.4	0.6	0.184	0.202	0.614	-0.0516	1	0	0	0	504	693	461	1	2	0
81	81	1.34108e+18	2020-12-21	covid_ This is the meek old and the new predatory covid, Bashir, a year, a face with symbols on the mouth, a face with symbols on the mouth	Al Mahboula	🇪🇬⚡Tarek Ali⚡🇪🇬	P.E Electrical Engineer "No resistance can drop our potential " Trainer and Assessor working in oil and gas industries	covid_ meek old new predatory covid bashir year face symbols mouth face symbols mouth	Negative Coping		venting of emotions	0.118182	0.327273	0	0	1	0	0	0	0	0	588	2342	17143	4	17	1
598	598	1.34093e+18	2020-12-21	DEAR COVID, SORRY IM REJECTING THE EARLY NEW YEARS GIFT...#COVID20 😭	Al Yarmouk	حنين غسان العثمان	"your struggles sketch your story, & your experiences tell your tale…” PR-ing around @ yarmouk.hc @ h.projects @ xcii	dear covid sorry im rejecting the early new years giftcovid loudly crying face	Positive Coping	mindfullness practices		-0.11591	0.588636	0.137	0.389	0.474	-0.5859	0	0	2	0	371	399	10790	1	8	0
594	594	1.34125e+18	2020-12-22	@wxmann No reported cases to that new virus but I think government is taking precautions .. Our daily numbers of Covid are really low ..	Bayan	Sarah AlSayegh سارة الصايغ	مصورة محترفة في صحيفة كويت نيوز @KuwaitNews، ومهتمة في صناعة الأخبار الاقتصادية وتقنية المعلومات. Journalist @KuwaitNews	no reported cases to that new virus but i think government is taking precautions our daily numbers of covid are really low	Positive Coping	positive reframing		0.045455	0.251515	0	0.19	0.81	-0.5704	0	0	0	0	9147	561	139741	111	5	0
593	593	1.34145e+18	2020-12-22	Many reasons why the lockdown has been POSITIVE for me COVID-19 is not positive in general. Peoples are being hurt in so many ways and it can be hard to look at the positive sides of the current situation I personally worked almost 7 days a week This has not been possible in 2020	Bneid Al Qar	NAHED SAWAS🎙	On my page you read my colorful thoughts, hear the voice of nature, play the melodies of time, and sing in the voice of the immortals	many reasons why the lockdown has been positive for me covid is not positive in general peoples are being hurt in so many ways and it can be hard to look at the positive sides of the current situation i personally worked almost days a week this has not been possible in	Positive Coping	positive reframing		0.109924	0.537803	0.116	0.125	0.759	0.122	0	1	1	0	3885	4384	32563	5	18	0
592	592	1.34283e+18	2020-12-26	Guess who is getting the vaccine tomorrow ✌🏻😎 https://t.co/abBlGLbkG9	Al Shuhada	KAWTHAR SAFAR	BMSc, MD ☤ ‘20 AGU Alumna.	guess who is getting the vaccine tomorrow victory hand smiling face with sunglasses	Positive Coping	engaging in relaxation techniques		0.4	0.7	0.307	0	0.693	0.7351	0	3	5	0	1068	715	40369	5	13	0
591	591	1.34311e+18	2020-12-27	Do you think its beautiful? I feel its terribly terrifying. Overcoming from #covid_19 we start seeing frequent flight ✈️ in and out bound over the sky of #kuwait #covid_19 #christmas @ Mina Addhulla Kuwait https://t.co/xIGS8aH7Ia	Mina Abdulla	Dubious	cant think beyond u	do you think its beautiful i feel its terribly terrifying overcoming from covid we start seeing frequent f airplane in and out bound over the sky of kuwait covid christmas mina addhulla kuwait	Negative Coping		denial	-0.01667	0.766667	0.095	0.177	0.728	-0.5267	0	0	0	0	25	58	315	2	8	1
590	590	1.34381e+18	2020-12-29	Feeling so fortunate to receive the Pfizer vaccine 💉 Here’s to science and the beginning of the end. Mask up, social distance and get the vaccine👏🏼 الحمدلله ❤️ https://t.co/mWKwM9KJ8w	Mubarak Al Abdullah	Abdullah Alenezi	We only live once, just do it right. ㅤㅤㅤ Left Handed Medical Doctor - RCSI Graduate ☤	feeling so fortunate to receive the pfizer vaccine syringe heres to science and the beginning of the end mask up social distance and get the vaccine clapping hands red heart	Positive Coping	mindfullness practices		0.144444	0.255556	0.229	0	0.771	0.8357	0	0	2	0	166	206	1974	0	7	0
589	589	1.34388e+18	2020-12-29	shlonik app calm please! https://t.co/YjfZ0LQQBA	Mishrif	﮼جنان🕊	Civil ENG | @CUDenver Alumna 👩🏼‍🎓	shlonik app calm please	Positive Coping	mindfullness practices		0.3	0.75	0.697	0	0.303	0.5574	0	1	0	0	409	405	12068	4	11	0
588	588	1.34398e+18	2020-12-29	I have taken the vaccine for you baby ❤️ see you soon https://t.co/phXhOZpPbh	Al Adan	Esraa	♥radiographer working in amiri hospital , MRI practitioner ♡ married , business influencer , business owner 💕 sassydresses	i have taken the vaccine for you baby red heart see you soon	Positive Coping	engaging in relaxation techniques		0	0	0.259	0	0.741	0.6369	0	0	0	0	562	190	26852	0	18	0
587	587	1.34425e+18	2020-12-30	@lorigraceaz We were in a full lockdown and curfew hours starts from 4pm local time ... so ... 😔	Bayan	Sarah AlSayegh سارة الصايغ	مصورة محترفة في صحيفة كويت نيوز @KuwaitNews، ومهتمة في صناعة الأخبار الاقتصادية وتقنية المعلومات. Journalist @KuwaitNews	we were in a full lockdown and curfew hours starts from pm local time so pensive face	Negative Coping		avoidance	0.175	0.275	0.098	0	0.902	0.188	0	0	1	0	9147	561	139741	111	11	1
586	586	1.34427e+18	2020-12-30	@news7tamil Best player Corona...	Al Farwaniya	Faizal Raiyan	█████ 100% Facebook ████ 80% Twitter ███ 60% Whatsapp IM MARRIED 🕺💃 Car Racing. Proud to be Muslim.	best player corona	Positive Coping	mindfullness practices		1	0.3	0.677	0	0.323	0.6369	0	0	1	0	1883	3897	3149	0	12	0
585	585	1.34439e+18	2020-12-30	#نختم٢٠٢٠_باعتراف_جميل We lived happy moments in it despite the epidemic, the next is more beautiful🥺❤️	Abdullah Al Mubarak - West Jleeb	ع🖤	eng⚙️⚒	we lived happy moments in it despite the epidemic the next is more beautiful pleading face red heart	Positive Coping	positive reframing		0.43	0.5	0.446	0	0.554	0.92	0	0	0	0	1514	1504	5495	0	21	0
583	583	1.34466e+18	2020-12-31	@AlbastakiDonia @BastakiH @KUWAIT_MOH @alghimlasclinic God bless him and bless you for all your hard work to make this vaccine available to all of us ❤️🌹🌹	Al Jabriyah	Sarah	constantly on the move	god bless him and bless you for all your hard work to make this vaccine available to all of us red heart rose rose	Positive Coping	mindfullness practices		0.261667	0.568333	0.368	0.043	0.588	0.8885	0	0	1	0	587	2145	2054	10	14	0
584	584	1.34462e+18	2020-12-31	Perfect way to end 2020- my 87 year grandfather Hussein Al Youha getting vaccinated with the help of public health superstar @BastakiH thank you @KUWAIT_MOH @alghimlasclinic https://t.co/MnChWih60q	Mina Abdulla	Sarah	constantly on the move	perfect way to end my year grandfather hussein al youha getting vaccinated with the help of public health superstar thank you	Positive Coping	mindfullness practices		0.5	0.533333	0.331	0	0.669	0.836	2	3	15	0	587	2145	2054	10	12	0
582	582	1.34507e+18	2021-01-01	“Keep your friend close and your sanitizer closer” UNKNOWN 2021 @ Kuwait City https://t.co/TlK5gLEayg	Al Qibla	ALI Knows Better	سبحان الله الحمد لله لا اله الا الله الله أكبر Instagram/Snapchat: champlooo	keep your friend close and your sanitizer closer unknown kuwait city	Positive Coping	mindfullness practices		-0.1	0.6	0.242	0	0.758	0.4939	0	0	0	0	218	1280	14761	7	18	0
80	80	1.34572e+18	2021-01-03	rayatalshaab Why is it not returned to the stores of the Ministry of Health? May God help us	Al Mahboula	ابونايف	س بطول العشرة ، إنما تُقاس بجميل الأثر وجميل الأخلاق..فكم من معرفة قصيرة المدى بجمالها وهدوئها أعمق وأنقى من أطول معرفة ...	rayatalshaab returned stores ministry health may god help us	Negative Coping		venting of emotions	0	0	0.231	0	0.769	0.5859	0	0	1	0	89	127	8677	0	13	1
579	579	1.35185e+18	2021-01-20	Is it our fault that coronavirus mutated? 😂	Qortuba	Ahmed G. AlZaid	BSc, DDS.Dalhousie University Alumni'18 🇨🇦	is it our fault that coronavirus mutated face with tears of joy	Positive Coping	mindfullness practices		0.8	0.2	0.218	0.264	0.517	0.0516	0	0	0	0	740	695	11351	2	11	0
580	580	1.3518e+18	2021-01-20	Thank you Lord🙏2nd dose Vaccination done💉💕😍 @ kuwait international fair V.I.P Lounge 4B https://t.co/f81hXmC3XP	Mubarak Al Abdullah	Elizabeth Bernas		thank you lord folded hands nd dose vaccination done syringe two hearts smiling face with hearteyes kuwait international fair vip lounge b	Positive Coping	mindfullness practices		0.35	0.45	0.475	0	0.525	0.9371	0	0	0	0	7	49	381	0	7	0
581	581	1.35179e+18	2021-01-20	This is me after corona pandemic ! 💔💔 https://t.co/tu2YsbnvDj	Al Masayel	Fatma	Pharmacist. KU graduate 🎓. A & K 💜	this is me after corona pandemic broken heart broken heart	Negative Coping		venting of emotions	-0.4	0.4	0.408	0.301	0.291	0.4939	0	0	1	0	235	411	15406	1	7	1
578	578	1.3523e+18	2021-01-21	CORONA I LOVE YOU...	Al Khaldiya	Fajer al-Nasser	ღ MY LUV SABAH ღ فجر الناصر	corona i love you	Positive Coping	mindfullness practices		0.5	0.6	0.583	0	0.417	0.6369	0	1	0	0	381	805	6115	1	17	0
577	577	1.35235e+18	2021-01-21	wearing a mask is working well with this weather. https://t.co/AtwKnPCuPU	Al Julayah - Al Zour - Sulah - Al Dubaiy	dau	اللهم احسن رحيلي ان حان وقته	wearing a mask is working well with this weather	Positive Coping	problem-solving		0	0	0.208	0	0.792	0.2732	0	0	0	0	1229	338	34041	3	20	0
576	576	1.35252e+18	2021-01-22	#Kuwait: So far, the only vaccine being administered in Kuwait is the Pfizer-BioNTech vaccine as Kuwait awaits the approval of the Oxford-Astrazeneca by the Food and Drug Administration (FDA). https://t.co/emFsfFyBm2	Kuwait	KWT Today	#KwtToday - Know What's Trending Today reports #news and views on #trending topics from the #MiddleEast and around the #World.	kuwait so far the only vaccine being administered in kuwait is the pfizerbiontech vaccine as kuwait awaits the approval of the oxfordastrazeneca by the food and drug administration fda	Positive Coping	positive reframing		0.05	1	0.14	0	0.86	0.5267	1	0	2	0	8414	2117	11700	26	7	0
79	79	1.35631e+18	2021-02-01	dkhon Indeed, the Corona crisis forgot guidance. We have known people with the best and most precious guidance. Well, tree leaves, hibiscus, tree leaves.	Al Mahboula	💜🇰🇼صديق البحر🇪🇬💜	‏‏‏‏‏‏‏ما بين منطوق لم يقصد ومقصود لم ينطق تضيع كثير من المحبه	dkhon indeed corona crisis forgot guidance known people best precious guidance well tree leaves hibiscus tree leaves	Positive Coping	positive reframing		0.666667	0.6	0.305	0.118	0.577	0.7548	0	1	1	0	250	373	6208	0	18	0
575	575	1.35714e+18	2021-02-04	Israel%27s rapid rollout provides the first real-world proof that COVID vaccination works as well... https://t.co/emhIdG4xyn via @YahooNews	Al Mahboula	Deva Ravi	mechanical engineer. ..the god of creativity	israels rapid rollout provides the first realworld proof that covid vaccination works as well via	Positive Coping	positive reframing		0.25	0.333333	0.13	0	0.87	0.2732	0	0	1	0	188	453	373	0	1	0
574	574	1.35923e+18	2021-02-09	Life Fitness Gymnasium, Abbassiya and Blood Donors Kerala, Kuwait Chapter are collectively planning an Emergency Blood Drive in association with @KwBloodBank; in the wake of pandemic created shortages of blood in the transfusion centres. https://t.co/nDq8DLeyYG	Al Mahboula	Bdkq8official		life fitness gymnasium abbassiya and blood donors kerala kuwait chapter are collectively planning an emergency blood drive in association with in the wake of pandemic created shortages of blood in the transfusion centres	Positive Coping	engaging in relaxation techniques		0	0	0.11	0.113	0.777	-0.0258	0	0	0	0	80	74	1312	0	19	0
572	572	1.35926e+18	2021-02-09	I’m ready #نبي_حظر	South West Sulibikhat	أحمد الحداد		im ready	Positive Coping	positive reframing		0.2	0.5	0.714	0	0.286	0.3612	0	0	0	0	153	155	1310	0	22	0
573	573	1.35923e+18	2021-02-09	What is the benefit of vaccine? I still don’t got it https://t.co/49fLHWSwoQ	Al Salam	علي الموسوي		what is the benefit of vaccine i still dont got it	Negative Coping		avoidance	0	0	0.231	0	0.769	0.4588	0	1	0	0	937	221	21235	1	19	1
571	571	1.35946e+18	2021-02-10	Covid19 Vaccine💉'.	مركز المسايل الصحي	.		covid vaccine syringe	Positive Coping	engaging in relaxation techniques		0	0	0	0	1	0	0	0	0	1	1091	1404	68827	4	11	0
78	78	1.36025e+18	2021-02-12	Ashwaqalali has been subjected to a total ban and we cannot buy qarqi’an	Al Mahboula	mohammad	مدرب معتمد للاسعافات الاولية ..جمعية القلب الامريكيه AHA ورش عمل مجانية لنشر ثقافة السلامة والرعاية الاولية في المجتمع ...اللهم ارحم اخوي واختي برحمتك	ashwaqalali subjected total ban cannot buy qarqian	Positive Coping	problem-solving		0	0.75	0	0.245	0.755	-0.5984	0	1	0	0	379	581	34898	0	15	0
570	570	1.36462e+18	2021-02-24	@KUWAIT_MOH Great work being done on COVID vaccination. Excellent arrangements indeed. Thank you Kuwait	Al Mahboula	Ravi		great work being done on covid vaccination excellent arrangements indeed thank you kuwait	Positive Coping	mindfullness practices		0.9	0.875	0.507	0	0.493	0.8834	0	0	0	0	0	0	1	0	17	0
569	569	1.3651e+18	2021-02-26	Everyone of us have horrible life, however we have corner that helps us to smiling . Therefore, remember that always there is hope. #Covid_19 #kuwait #aouthoughts #aoukw	Al Qasr	Adnan Mezher	أنت من تجعل المستحيل مستحيل حين تقول مستحيل.👍🏻 معلم لغة انجليزية ((شعاري الانجليزي وناسه🕹️ مودراسه)	everyone of us have horrible life however we have corner that helps us to smiling therefore remember that always there is hope covid kuwait aouthoughts aoukw	Positive Coping	positive reframing		-1	1	0.25	0.103	0.647	0.6124	0	0	2	0	63	104	1363	0	1	0
568	568	1.36543e+18	2021-02-26	Oftentimes, I need long space alone with my self to know who am I become. #Covid_19 #aoukw #aouthoughts #kuwait	Al Qasr	Adnan Mezher	أنت من تجعل المستحيل مستحيل حين تقول مستحيل.👍🏻 معلم لغة انجليزية ((شعاري الانجليزي وناسه🕹️ مودراسه)	oftentimes i need long space alone with my self to know who am i become covid aoukw aouthoughts kuwait	Positive Coping	mindfullness practices		-0.05	0.4	0	0.1	0.9	-0.25	0	0	1	0	63	104	1363	0	22	0
565	565	1.36566e+18	2021-02-27	I bet the same people who don’t believe in Covid believe that the earth is flat	Al Julayah - Al Zour - Sulah - Al Dubaiy	عبدالعزيز المهيني	الحمدالله على كل حال	i bet the same people who dont believe in covid believe that the earth is flat	Positive Coping	mindfullness practices		-0.0125	0.125	0	0	1	0	0	0	0	0	283	271	9318	1	13	0
567	567	1.36552e+18	2021-02-27	COVID-19 catch me 🦠	Al Shaab	نعيمه☁️💕	AUM ALUMNA 👷🏻‍♀️🐓	covid catch me microbe	Positive Coping	mindfullness practices		0	0	0	0	1	0	0	1	0	0	202	275	2639	0	4	0
566	566	1.36561e+18	2021-02-27	COVID-19 VACCINES ARE COMING! February 28 600,000 doses of Sinovac March 1 525,600 doses of AstraZeneca A promise fulfilled! GO DUTERTE! 👊🏼🇵🇭	Al Rai	مارك ليجاسي		covid vaccines are coming february doses of sinovac march doses of astrazeneca a promise fulfilled go duterte oncoming fist philippines	Positive Coping	positive reframing		0	0	0.195	0	0.805	0.6249	0	0	0	0	156	599	5042	0	10	0
564	564	1.3657e+18	2021-02-27	Take care of social distancing ⚠️ https://t.co/S2xCTnA0sL	McDonald's - ماكدونالدز	ᴵᴮᴿᴬᴴᴵᴹ	اللهم اني اسألك حسن الخاتمة .	take care of social distancing warning	Positive Coping	positive reframing		0.033333	0.066667	0.333	0.25	0.417	0.2023	0	0	0	0	95	10	6551	0	16	0
563	563	1.36605e+18	2021-02-28	Goodbye lovely February 🌦⛅️🕊 I hope you’ll come without Corona next year inshallah 🤲🏼 Amen 🌿 https://t.co/A726on5JZk	sulaibkhat beach	✿	أ. أنوار فاهد 🌸 عضو رابطة الأدباء ✍🏼 | كلية التربية @K_University | 📚: ➀ الاتصال ولُغة التحفيز ➁ تأملات تحت شجرة الكرز | Archery 🏹♥️	goodbye lovely february sun behind rain cloud sun behind cloud dove i hope youll come without corona next year inshallah palms up together amen herb	Positive Coping	mindfullness practices		-0.075	0.5375	0.205	0	0.795	0.7717	0	0	1	0	617	592	11683	5	15	0
562	562	1.36608e+18	2021-02-28	Johnson &amp; Johnson’s vaccine single shot ✅ https://t.co/PYRuTrqlLR	Al Masayel	Dr.Al-Tendail | د. يوسف التنديل	Medical Doctor BSc, MD | AGU graduate 2019 مؤسس فريق #سحابة_أمل التطوعي @sahabt__amal Instagram: @dr_yousif_m Snapchat: Dr9yousif4m #كلام_دكاترة 🎬 #خطوات_صحية	johnson amp johnsons vaccine single shot check mark button	Positive Coping	engaging in relaxation techniques		-0.07143	0.214286	0	0	1	0	0	0	0	0	4121	1119	19637	7	17	0
561	561	1.36637e+18	2021-03-01	@GiiiKh Thank you love. ♥️ Entay Oxford wala Pfizer?	Al Shuwaikh	🇫🇷Adla Dumoret🇰🇼	Je suis qui je suis	thank you love heart suit entay oxford wala pfizer	Positive Coping	seeking social support		0.5	0.6	0.645	0	0.355	0.8979	0	1	0	0	5409	262	114805	4	12	0
560	560	1.3664e+18	2021-03-01	I can’t wait to say “Remember COVID ? “	Kuwait	‏﮼نون ‏﮼	𝐿𝑖𝑣𝑒 𝑠𝑖𝑚𝑝𝑙𝑦	i cant wait to say remember covid	Positive Coping	mindfullness practices		0	0	0	0	1	0	0	0	0	0	9422	8071	20819	1	14	0
559	559	1.36912e+18	2021-03-09	Traffic in Mahboula to kick off the day once the curfew is lifted... good times(when you can wfh) @ Mahboula https://t.co/Kl37bPcJXw	Al Mahboula	Eric Chamberlin	Learning Management Systems support specialist -Avenues.org Online	traffic in mahboula to kick off the day once the curfew is lifted good timeswhen you can wfh mahboula	Positive Coping	mindfullness practices		0.7	0.6	0.139	0	0.861	0.4404	0	0	0	0	207	432	2612	11	2	0
558	558	1.37073e+18	2021-03-13	@Ramble13 Y’all love Covid huh	Sabah Al Salem	GAR.Kelly 🇱🇷	Rapper,Comedian,Actor, Life Coach For Whores GargarTheReal@Gmail.com Audio: https://t.co/481Tyu6ZUO http://	yall love covid huh	Positive Coping	mindfullness practices		0.5	0.6	0.583	0	0.417	0.6369	0	0	0	0	1494	676	263824	16	13	0
557	557	1.37122e+18	2021-03-14	lol my mind still cannot comprehend the pandemic we’re in	Khiran 290	shz		lol my mind still cannot comprehend the pandemic were in	Positive Coping	mindfullness practices		0.8	0.7	0.237	0	0.763	0.4215	2	0	0	0	450	224	1391	2	21	0
556	556	1.37144e+18	2021-03-15	I got my COVID-19 vaccine .. 💉 #نعم_للتطعيم #الحمدلله #تطعيم_كورونا #الكويت https://t.co/5uk3drVQ4n	Mubarak Al Abdullah	‏﮼زوزز،بنت،جاسم	ياربَ أرزقَ والديّ جنةُعرضهآ السمواتُ والأرضّ♡ ﮼ربي،ارحم،أبي ..♥️	i got my covid vaccine syringe	Positive Coping	engaging in relaxation techniques		0	0	0	0	1	0	0	1	6	0	2446	63	536988	3	12	0
555	555	1.37154e+18	2021-03-15	@JKhawlyAH Thank you #corona and #Quarantine for giving me this time to do exactly this 🙏🏻	Sabah Al Salem	Sayed M. Al-Mousawi ☫	A caffeine dependent life-form ☕️ Love is my religion ❤️	thank you corona and quarantine for giving me this time to do exactly this folded hands	Positive Coping	mindfullness practices		0.325	0.475	0.224	0	0.776	0.5994	0	0	0	0	834	311	53381	8	19	0
77	77	1.37183e+18	2021-03-16	albloushie somaiyyah ban rolling on the ground from the new moon laughing with his face	Al Mahboula	‎أَبْرَار 🍍	★ CHEF👩‍🍳 , Cooking is just where i can express myself ..	albloushie somaiyyah ban rolling ground new moon laughing face	Positive Coping	mindfullness practices		0.136364	0.454545	0.162	0.182	0.657	-0.1027	0	1	0	0	390	300	13707	0	14	0
76	76	1.37407e+18	2021-03-22	The ban ends. We go out to the street. We forgot to walk. How upset. Corona_Nefer V. Emoji rate three tcoa t s w	Al Mahboula	saad stmony shrf	الحياة معركة.. البعض فيها يقود والبعض فيها يقاد فان لم تستطع ان تكون سيدٱ لنفسك ، فلا تكن خادما للآخرين	ban ends go street forgot walk upset corona_nefer emoji rate three	Positive Coping	mindfullness practices		0	0	0	0.22	0.78	-0.7351	0	0	1	0	14	392	103	0	18	0
75	75	1.3747e+18	2021-03-24	altijaricbk kuwait_moh May God protect you and fulfill your dreams, Sarah	Al Mahboula	اللهم ارحم ابي وامي	الحب بكل صدق	altijaricbk kuwait_moh may god protect fulfill dreams sarah	Positive Coping	mindfullness practices		0	0	0.595	0	0.405	0.8519	0	0	0	0	13	82	997	3	12	0
553	553	1.37657e+18	2021-03-29	Day 8 with COVID-19 🤯	Al Mahboula	Thadz	If I were to give myself A single present It would be: Confidence	day with covid exploding head	Negative Coping		venting of emotions	0	0	0	0	1	0	0	0	0	0	150	382	2875	5	16	1
74	74	1.3766e+18	2021-03-29	Disease, ignorance, and poverty are a deadly trinity that must be destroyed to build an advanced, civilized nation. Total ban without Corona	Al Mahboula	Nadia Kawash 🌿❥ ناديا كَعْوَش	❥ مهتمة في شؤون الأدب والنقد الأدبي❥ بكالوريوس في الأدب الإنجليزي 🎓أدرُسُ النقد الأدبي ❥ عضو مؤسس لنادي شذرات الثقافي❥ مدير شؤون الطلبة ❥ جامعة بوكسهل الكويت ❥	disease ignorance poverty deadly trinity must destroyed build advanced civilized nation total ban without corona	Negative Coping		venting of emotions	0.15	0.6625	0.063	0.404	0.533	-0.8977	0	1	7	0	1372	401	9848	3	18	1
554	554	1.37647e+18	2021-03-29	@learning_gee I miss city weekends and restaurants so much right now! Curfew and traffic needs to end pronto! 😂🤞	Al Mahboula	Miss Eleonore 🇭🇰🇰🇼	Year 1 Teacher abroad ✈️ |📍Hong Kong 🌟🇭🇰 | 3 years in Kuwait 🇰🇼 | Blogging my expat journey 🌏 | Primary Education with Music graduate - UOR🌈👩‍🎓	i miss city weekends and restaurants so much right now curfew and traffic needs to end pronto face with tears of joy crossed fingers	Negative Coping		wishful thinking	0.542857	0.367857	0.134	0.124	0.742	0.3182	0	1	1	0	796	710	345	1	9	1
73	73	1.37705e+18	2021-03-31	kuwait_moh Look at how they get through the crowds, you crowd people at the same time tcooeylp y mf	Al Mahboula	abdulaziz almouli	ارسنالي .... ❤️ Arsenal @arsenal	kuwait_moh look get crowds crowd people time	Negative Coping		wishful thinking	0	0.125	0	0	1	0	0	0	1	0	335	372	7453	0	0	1
72	72	1.37715e+18	2021-03-31	Kuwait kuwait_moh drbaselalsabah majlesalommah kuwaiticm tcotshceljxcn	Al Mahboula	abdulaziz almouli	ارسنالي .... ❤️ Arsenal @arsenal	kuwait kuwait_moh drbaselalsabah majlesalommah kuwaiticm	Negative Coping		venting of emotions	0	0	0	0	1	0	0	0	0	0	335	372	7453	0	7	1
549	549	1.37723e+18	2021-03-31	It was so jam packed, that Corona could not squeeze in https://t.co/MU4uZwsqYo	Al Salmiyah	Guru_Raj🎈🏹🍻🐸	#Techie, #Fintech, #BNPL, Founder Gandhi #Archery Kwt, Taurean born free, unconventional thinker, logical, one-woman passionate lover	it was so jam packed that corona could not squeeze in	Negative Coping		venting of emotions	0	0	0	0	1	0	0	0	0	0	346	1260	16322	37	11	1
547	547	1.37726e+18	2021-03-31	@indembkwt @AmbSibiGeorge @DrSJaishankar Respected Sirs, me &amp; my family registered for the COVID vaccines in Kuwait on 5 Jan but have not received any response. This is the case with many other Indians. Is it possible to arrange vaccinations for Indians at embassy. Pls help!	Al Salmiyah	Atul		respected sirs me amp my family registered for the covid vaccines in kuwait on jan but have not received any response this is the case with many other indians is it possible to arrange vaccinations for indians at embassy pls help	Positive Coping	seeking social support		0.125	0.625	0.156	0	0.844	0.7227	0	0	0	0	0	22	54	0	13	0
548	548	1.37724e+18	2021-03-31	i got my second vaccine 💉 ✅	Mubarak Al Abdullah	𝗔𝗻𝗮𝗱𝗲𝗹 𝗔𝗹𝗠𝘂𝘁𝗮𝗶𝗿𝗶		i got my second vaccine syringe check mark button	Positive Coping	engaging in relaxation techniques		0	0	0	0	1	0	0	0	0	0	190	206	3032	0	12	0
550	550	1.37721e+18	2021-03-31	vaccination officially done ✅	ارض المعارض قاعه 5	هـلل		vaccination officially done check mark button	Positive Coping	engaging in relaxation techniques		0	0	0	0	1	0	0	0	1	0	1601	980	30063	0	10	0
551	551	1.37721e+18	2021-03-31	Second vaccine dose done ✅💉	ارض المعارض قاعه 5	أريـــج الطراروه	Love is the Middle of my name 🤍	second vaccine dose done check mark button syringe	Positive Coping	engaging in relaxation techniques		0	0	0	0	1	0	0	0	0	0	544	328	4720	0	10	0
552	552	1.37718e+18	2021-03-31	Vaccination Done Thank you kuwait ❤️🌹 https://t.co/A2kGRuU71N	Kuwait Vaccination Center مركز الكويت للتطعيم	Muhammad Ali Elnakeb	Alexandria📍🇪🇬 🇰🇼-Pua University - Faculty of Medical Science - Medical Lab Specialist - Owner of Delta Lab - Actor at #Comic_team My Mum is everything💙	vaccination done thank you kuwait red heart rose	Positive Coping	engaging in relaxation techniques		0.3	0.475	0.528	0	0.472	0.7717	0	0	0	0	67	377	719	0	8	0
71	71	1.37755e+18	2021-04-01	Now, in the Palace of Justice, the fourth floor, in front of the smoking hall, masks are in front of everyone, and you say an epidemic and the possibility of a total ban, and God is the Helper.	Al Mahboula	نضال الحميدان	محامية بالتمييز والدستورية، محكم بدرجة د بمركز تحكيم جمعية المحامين .	now palace justice fourth floor front smoking hall masks front everyone say epidemic possibility total ban god helper	Negative Coping		venting of emotions	0	0.375	0.177	0.085	0.738	0.5058	2	2	4	1	3465	769	13832	5	9	1
545	545	1.37788e+18	2021-04-02	Being a Doctor 👨🏼‍⚕️ Caring for others is important ! And is part of our job &amp; profession , but #covid_19 taught us so many lessons one of them turn to be that sometimes, by caring for yourself, you’re caring for others, too . “ I Work, You SMILE “ . #drsamtabban #iworkusmile https://t.co/YTytKWwnMB	The Avenues	Dr. Samer Tabban	Passionate Italian Orthodontist from #Treviso, Born in #Montebelluna, Practicing between Italy & Kuwait, Traveller, Ex-Basketball Player, Father of 3 girls	being a doctor man health worker caring for others is important and is part of our job amp profession but covid taught us so many lessons one of them turn to be that sometimes by caring for yourself youre caring for others too i work you smile drsamtabban iworkusmile	Positive Coping	engaging in relaxation techniques		0.4	0.533333	0.246	0	0.754	0.9366	0	0	3	0	1753	121	4524	10	7	0
544	544	1.37804e+18	2021-04-02	Enough is enough corona😡 #goaway	Hitteen	ريم فوزي الشهاب	“be nice for no reason” | Electrical Engineer⚡️	enough is enough corona enraged face goaway	Negative Coping		wishful thinking	0	0.5	0	0.31	0.69	-0.4019	0	2	0	0	921	587	20986	3	17	1
546	546	1.37783e+18	2021-04-02	Even emojis have been affected by Covid 🥺	Al Shuhada	حوراء حسن المتروك	ҫнакиоом 🧜🏻‍♀️ قل الحكي أحيان ... من كثر الإحساس	even emojis have been affected by covid pleading face	Positive Coping	mindfullness practices		0	0	0	0.167	0.833	-0.1531	0	0	1	0	1709	1273	37359	8	3	0
67	67	1.37941e+18	2021-04-06	Of course, a tremendous personal effort, Dr. Youssef, where is your role? Ministry of Health kuwait_moh tcobfg hgfnwz	Al Mahboula	abdulaziz almouli	ارسنالي .... ❤️ Arsenal @arsenal	course tremendous personal effort dr youssef role ministry health kuwait_moh	Positive Coping	mindfullness practices		0.166667	0.65	0	0	1	0	1	0	4	0	335	372	7453	0	12	0
68	68	1.3794e+18	2021-04-06	kuwait_moh dr_s_almutairi yayshamsaldeen Ministry of Health The idea is that we are watching the news, it is not your way. Can you talk and explain what is the situation of the people who took a single dose Oxford tco btweqtb i	Al Mahboula	abdulaziz almouli	ارسنالي .... ❤️ Arsenal @arsenal	kuwait_moh dr_s_almutairi yayshamsaldeen ministry health idea watching news way talk explain situation people took single dose oxford	Negative Coping		avoidance	-0.07143	0.214286	0	0	1	0	1	1	0	0	335	372	7453	0	11	1
69	69	1.3794e+18	2021-04-06	kuwait_moh You are with us on the same planet. A report came out saying that the Oxford vaccine causes clots. A report came out saying that the infected person who recovers takes the vaccine alone. We will see you. You spoke. You said something. dr_s_almutairi. The people are lost. The Ministry of Health is alive. Whoever calls the brother says we will wait for the Day of Resurrection for interro…	Al Mahboula	abdulaziz almouli	ارسنالي .... ❤️ Arsenal @arsenal	kuwait_moh us planet report came saying oxford vaccine causes clots report came saying infected person recovers takes vaccine alone see you spoke said something dr_s_almutairi people lost ministry health alive whoever calls brother says wait day resurrection interrogation	Negative Coping		denial	0.05	0.2625	0.034	0.099	0.867	-0.5994	1	0	0	0	335	372	7453	0	11	1
70	70	1.37939e+18	2021-04-06	A week ago, the plane flew by and they refused to let me in because I was paying the value of the swabs to return to Kuwait = an unknown dinar, and I had to book another ticket, my own account, and I am currently in the hotel, institutional quarantine, my own account. The question is to the Minister of Health, the cost of arrivals in psychiatry, the State of Kuwait.	Al Mahboula	بونواف	متقاعد: مايتابع تصريحات رئيس الحكومه ولا رئيس مجلسهم،،، 🇰🇼⁩🇹🇷⁩	week ago plane flew refused let paying value swabs return kuwait unknown dinar book another ticket account currently hotel institutional quarantine account question minister health cost arrivals psychiatry state kuwait	Negative Coping		venting of emotions	0.275	0.75	0.033	0.03	0.938	0.0516	0	0	0	0	162	224	1683	3	10	1
64	64	1.37957e+18	2021-04-06	kuwait_moh You see, the health of your people is not important to you. The most important thing is that you are stubborn. You are right, I swear to God, I will make propaganda tcol ymkqlpzp	Al Mahboula	abdulaziz almouli	ارسنالي .... ❤️ Arsenal @arsenal	kuwait_moh see health people important you important thing stubborn right swear god make propaganda	Negative Coping		denial	0.177143	0.627143	0.103	0.184	0.713	-0.318	0	0	0	0	335	372	7453	0	22	1
65	65	1.37955e+18	2021-04-06	By God, we all know that the defect is not what is in the fields. The defect is administrative. The Minister, the Special Committee for Corona, kuwait_moh. We hope for an explanatory statement from you. tco c vhsaf	Al Mahboula	abdulaziz almouli	ارسنالي .... ❤️ Arsenal @arsenal	god know defect fields defect administrative minister special committee corona kuwait_moh hope explanatory statement you	Negative Coping		denial	0.357143	0.571429	0.169	0.105	0.725	0.4404	1	1	1	0	335	372	7453	0	21	1
66	66	1.37943e+18	2021-04-06	kuwait_moh Hello Ministry, we know what to do. Our goal is to complicate people and consume medical staff. tcoxygtz ikdk	Al Mahboula	abdulaziz almouli	ارسنالي .... ❤️ Arsenal @arsenal	kuwait_moh hello ministry know do goal complicate people consume medical staff	Negative Coping		denial	0	0	0	0	1	0	0	0	0	0	335	372	7453	0	13	1
63	63	1.38087e+18	2021-04-10	kuwait_moh I swear a drunk person is just like you tcohxtatxmybl tcoxygtz jlm	Al Mahboula	abdulaziz almouli	ارسنالي .... ❤️ Arsenal @arsenal	kuwait_moh swear drunk person	Negative Coping		denial	-0.5	1	0.155	0.224	0.621	-0.0258	0	0	0	0	335	372	7453	0	13	1
539	539	1.38537e+18	2021-04-22	Just a random Sunset day in a Pandemic era . Kuwait , 2021 https://t.co/Z7SEcEzUxZ	Bayan	Sarah AlSayegh سارة الصايغ	مصورة محترفة في صحيفة كويت نيوز @KuwaitNews، ومهتمة في صناعة الأخبار الاقتصادية وتقنية المعلومات. Journalist @KuwaitNews	just a random sunset day in a pandemic era kuwait	Positive Coping	engaging in relaxation techniques		-0.5	0.5	0	0	1	0	8	0	23	0	9147	561	139741	111	23	0
540	540	1.38533e+18	2021-04-22	As respiratory therapist it is heartbreaking losing your patients to COVID-19,A test case to Healthcare managers! @ImranKhanPTI please extend your help! #WearAMask #IndiaNeedsOxygen	Hawalli	Aamir Raheem	Respiratory Therapist| Healthcare manager| retweets doesn't mean endorsement!	as respiratory therapist it is heartbreaking losing your patients to covida test case to healthcare managers please extend your help wearamask indianeedsoxygen	Positive Coping	seeking social support		0	0	0.229	0.191	0.58	0.0258	0	1	0	0	792	631	53902	33	20	0
542	542	1.38525e+18	2021-04-22	#corona symptoms - One of em is taste loss . How can one verify thats its an corona symptom while eating wife cooked meal ?	Al Salmiyah	Immanuel John Varghese	Immsy	corona symptoms one of em is taste loss how can one verify thats its an corona symptom while eating wife cooked meal	Positive Coping	mindfullness practices		0	0	0	0.099	0.901	-0.3182	0	0	0	0	311	625	18262	6	15	0
543	543	1.38519e+18	2021-04-22	government should ban fancy or clothes face mask #BreakTheChain #CoronavirusPandemic #PMOIndia #NarendraModi #COVID19India	Al Mahboula	Arshad khan ارشد خان अरशद खाँन	if you are right...go left	government should ban fancy or clothes face mask breakthechain coronaviruspandemic pmoindia narendramodi covidindia	Positive Coping	seeking social support		0	0	0	0.231	0.769	-0.5574	0	0	0	0	151	873	369	0	11	0
541	541	1.38527e+18	2021-04-22	@FatEmperor Boo hoo! What a dreadful burden for your children to bear: homelessness, hunger, constant war and destruction, famine? Oh...wait...they have to wear a mask? I wonder why we have offended, entitled little brats now at 5 or 6? 1st World Problem!	Al Salmiyah	Ross Appleby	Aussie Ex-pat, mad Collingwood fan, living in the desert.	boo hoo what a dreadful burden for your children to bear homelessness hunger constant war and destruction famine ohwaitthey have to wear a mask i wonder why we have offended entitled little brats now at or st world problem	Negative Coping		venting of emotions	-0.39583	0.611111	0.039	0.378	0.583	-0.9517	0	10	3	0	151	178	1101	3	16	1
536	536	1.38577e+18	2021-04-24	Those who were correcting their corona with dung today are also looking for beds in the hospital. https://t.co/j6fIZlYLFE	Al Mahboula	Saddam Khan	पुराना एफबी अकाउंट फॉरगेट पासवड़ https://t.co/8SRgC36OEv	those who were correcting their corona with dung today are also looking for beds in the hospital	Positive Coping	mindfullness practices		0	0	0	0	1	0	0	0	1	0	162	832	1954	0	1	0
537	537	1.38577e+18	2021-04-24	Those who were correcting their corona with dung today are also looking for beds in the hospital. @anjanaomkashyap @sardanarohit	Al Mahboula	Saddam Khan	पुराना एफबी अकाउंट फॉरगेट पासवड़ https://t.co/8SRgC36OEv	those who were correcting their corona with dung today are also looking for beds in the hospital	Positive Coping	mindfullness practices		0	0	0	0	1	0	0	0	1	0	162	832	1954	0	1	0
538	538	1.38576e+18	2021-04-24	I was never one to give too much thought to stress and anxiety. Then my BP regularly shot up during this pandemic. Its been a nasty fight. But then I found that meditation really does work and I haven’t given stress and anxiety enough credit as leading factors to my BP issue.	Al Surra	Ahmad Al-Karmi	A product manager who previously spent ~12 years in innovation and transformation consulting. Welcome to my world. My views and words are my own.	i was never one to give too much thought to stress and anxiety then my bp regularly shot up during this pandemic its been a nasty fight but then i found that meditation really does work and i havent given stress and anxiety enough credit as leading factors to my bp issue	Positive Coping	mindfullness practices		-0.12	0.395385	0.105	0.155	0.74	-0.0005	0	1	0	0	203	823	4451	7	0	0
535	535	1.38977e+18	2021-05-05	The way the vaccine certificate has a photo of Modi, In the same way, the death certificate of those who died of Corona should also have a photo of Modi.	Al Mahboula	Saddam Khan	पुराना एफबी अकाउंट फॉरगेट पासवड़ https://t.co/8SRgC36OEv	the way the vaccine certificate has a photo of modi in the same way the death certificate of those who died of corona should also have a photo of modi	Positive Coping	mindfullness practices		0	0.125	0	0.211	0.789	-0.8176	0	0	0	0	162	832	1954	0	2	0
533	533	1.39061e+18	2021-05-07	#teamBDK_Q8's Donors Nalinakshan Thazhevalappil &amp; Sreejith have donated Single Donor Platelets (SDP) at @kwbloodbank on emergency calls. Thank you all for the prompt response. @Drhananalawadhi @KUWAIT_MOH #teamBDK_Q8 #togetherwecan #TodaysHero #savinglivestogether 07/05/2021 https://t.co/IsE86QFCTT	Al Mahboula	Bdkq8official		teambdk qs donors nalinakshan thazhevalappil amp sreejith have donated single donor platelets sdp at on emergency calls thank you all for the prompt response savinglivestogether	Positive Coping	mindfullness practices		-0.07143	0.214286	0.089	0.093	0.819	-0.0258	2	0	2	0	80	74	1312	0	10	0
534	534	1.39055e+18	2021-05-07	The way the vaccine certificate has a photo of Modi, @ashutosh83B In the same way, the death certificate of those who died of Corona should also have a photo of Modi.	Al Mahboula	Saddam Khan	पुराना एफबी अकाउंट फॉरगेट पासवड़ https://t.co/8SRgC36OEv	the way the vaccine certificate has a photo of modi in the same way the death certificate of those who died of corona should also have a photo of modi	Positive Coping	mindfullness practices		0	0.125	0	0.211	0.789	-0.8176	0	0	1	0	162	832	1954	0	6	0
532	532	1.3926e+18	2021-05-12	It’s 1 am in kuwait city 🕐 Covid-19 season (2) is done✅ https://t.co/o0krFryaqn	Bayan	يوسف يعقوب الرضوان		its am in kuwait city one oclock covid season is done check mark button	Positive Coping	positive reframing		0	0	0	0	1	0	0	0	0	0	258	262	1437	0	22	0
531	531	1.39262e+18	2021-05-12	A lot of fucked up shit going on in the world. Not just covid	Al Jahra	Noel	open your eyes before you die. @immortaltech soldier supporter! listen to @beast1333 💯 SATX📍	a lot of fucked up shit going on in the world not just covid	Negative Coping		venting of emotions	-0.4	0.75	0	0.4	0.6	-0.8402	0	0	1	0	2289	1858	156556	0	23	1
529	529	1.39298e+18	2021-05-13	First day without curfew has been a bliss.	Al Jabriyah	May	Nephophile	first day without curfew has been a bliss	Positive Coping	mindfullness practices		0.25	0.333333	0.346	0	0.654	0.5719	0	0	0	0	102	121	1006	0	23	0
62	62	1.39297e+18	2021-05-13	kuwait_moh drbaselalsabah Stop absorbing the rapid development in the world and keep up with them tcozuhsxugzxk	Al Mahboula	abdulaziz almouli	ارسنالي .... ❤️ Arsenal @arsenal	kuwait_moh drbaselalsabah stop absorbing rapid development world keep	Negative Coping		denial	0.2	0.95	0	0.128	0.872	-0.296	0	0	0	0	335	372	7453	0	22	1
530	530	1.39276e+18	2021-05-13	I hate cats but I feed the stray cats since Corona started .... Why dont humans live with love within hatred and cause no harm	Al Salmiyah	Immanuel John Varghese	Immsy	i hate cats but i feed the stray cats since corona started why dont humans live with love within hatred and cause no harm	Positive Coping	positive reframing		-0.05455	0.666667	0.254	0.216	0.53	0.3453	0	0	1	0	311	625	18262	6	8	0
528	528	1.39319e+18	2021-05-14	An interesting topic on Day 3 of Empower Kuwait Talks that everyone can benefit from, especially during this pandemic. Diet Fix's very own Ahmad AlFailakawi will be letting us know all about healthy diets vs. fad diets. #الكندية https://t.co/CINAGg4Mjf	Al Surra	Algonquin Kuwait الكلية الكندية في الكويت	Algonquin College Kuwait🇨🇦is a branch Campus of Algonquin College, an internationally recognized Canadian College. الكلية الكندية في الكويت 🇰🇼 📞22060260	an interesting topic on day of empower kuwait talks that everyone can benefit from especially during this pandemic diet fixs very own ahmad alfailakawi will be letting us know all about healthy diets vs fad diets	Positive Coping	positive reframing		0.445	0.75	0.243	0	0.757	0.8519	1	0	3	0	1171	40	2079	17	13	0
527	527	1.39332e+18	2021-05-14	@mrm @vedrankaracic @youyuxi @PhotoStructure I guess it depends on the type of vaccination, if not sure, you must consult a doctor about it.	Al Salmiyah	Mohyaddin Alaoddin	A promising person who's trying to make life easier for everyone, my dream is to see the world a better place for human beings by developing ourselves.	i guess it depends on the type of vaccination if not sure you must consult a doctor about it	Positive Coping	seeking social support		-0.25	0.888889	0	0.098	0.902	-0.2411	0	0	0	0	260	678	1027	5	21	0
61	61	1.39323e+18	2021-05-14	drbaselalsabah kuwait_moh Can you advise the person who is going to be the intermediary on people’s health tcocazdq qhlx	Al Mahboula	abdulaziz almouli	ارسنالي .... ❤️ Arsenal @arsenal	drbaselalsabah kuwait_moh advise person going intermediary people health	Negative Coping		denial	0	0	0	0	1	0	0	0	0	0	335	372	7453	0	15	1
526	526	1.3934e+18	2021-05-15	@dogradogra01 @AbangRajan @aintexist_ You have vaccine but But You Don't hospital to treat them. You don't oxygen. You don't have Ambulance. You don't have Shamshan. You don't have person to fire the body. You don't have that's you are throwing your dead body in the river and Muslim are burning the dead Bodies.	Al Jahra	#AllahuAkbar	I am proud of the Palestinian people. I am really proud of them because nothing stops them #SavePalestine #القدس_ينتفض #PalestineWillBeFree #المسجد_الأقصى	you have vaccine but but you dont hospital to treat them you dont oxygen you dont have ambulance you dont have shamshan you dont have person to fire the body you dont have thats you are throwing your dead body in the river and muslim are burning the dead bodies	Negative Coping		venting of emotions	-0.2	0.4	0	0.28	0.72	-0.9632	0	0	0	0	311	877	5206	0	2	1
525	525	1.39366e+18	2021-05-15	On April 30, 2020, the day the University of Oxford signed an agreement with the UK-based AstraZeneca for development, manufacture and distribution of the COVID-19 vaccine (ChAdOx1 nCoV-19) that was then undergoing clinical trials,	Al Qadisiyah	𝑱𝒂𝒎𝒂𝒍 𝑨𝒍-𝑭𝒐𝒖𝒅𝒂𝒓𝒊		on april the day the university of oxford signed an agreement with the ukbased astrazeneca for development manufacture and distribution of the covid vaccine chadox ncov that was then undergoing clinical trials	Positive Coping	positive reframing		0	0	0.094	0	0.906	0.4939	0	1	0	0	159	110	2633	0	20	0
524	524	1.39366e+18	2021-05-15	both partners committed to “operate on a not-for-profit basis for the duration of the coronavirus pandemic, with only the costs of production and distribution being covered”.	Al Qadisiyah	𝑱𝒂𝒎𝒂𝒍 𝑨𝒍-𝑭𝒐𝒖𝒅𝒂𝒓𝒊		both partners committed to operate on a notforprofit basis for the duration of the coronavirus pandemic with only the costs of production and distribution being covered	Positive Coping	positive reframing		0	1	0.077	0	0.923	0.2732	0	1	0	0	159	110	2633	0	20	0
523	523	1.39415e+18	2021-05-17	I guess I'm having covid again😅 with all these symtoms 😞🤒🤯🤕	Al Mahboula	Thadz	If I were to give myself A single present It would be: Confidence	i guess im having covid again grinning face with sweat with all these symtoms disappointed face face with thermometer exploding head face with headbandage	Negative Coping		venting of emotions	-0.75	0.75	0.091	0.112	0.797	-0.1531	0	0	1	0	150	382	2875	5	4	1
60	60	1.3973e+18	2021-05-25	kuwait_moh drbaselalsabah You can see my great respect for Iraq. Kuwait’s capabilities are supposed to be larger than Iraq by virtue of population census and financial conditions tcozvo djxn	Al Mahboula	abdulaziz almouli	ارسنالي .... ❤️ Arsenal @arsenal	kuwait_moh drbaselalsabah see great respect iraq kuwait capabilities supposed larger iraq virtue population census financial conditions	Negative Coping		denial	0.266667	0.416667	0.278	0	0.722	0.875	1	0	1	0	335	372	7453	0	21	1
522	522	1.39714e+18	2021-05-25	With the Government of Tamil Nadu now tackling Corona pandemic head-on, we request the Tamil diaspora to contribute to the CM Public Relief Fund. The details required for the transaction is mentioned below. Let's Unite. #COVID19 #DMKNRIWING @DMKNRIWing @KWTDMKIT @TRBRajaa https://t.co/VnzwEy48I9	Al Mahboula	சிதம்பரம் ந.தியாகராஜன்	மானமுள்ள சுயமரியாதைக்காரன்.. BELONGS TO THE DRAVIDIAN STOCK.. 🖤❤ பொறுப்பாளர், தி.மு.கழக அயலக அணி, குவைத். தொடர்புக்கு: +965 55224809	with the government of tamil nadu now tackling corona pandemic headon we request the tamil diaspora to contribute to the cm public relief fund the details required for the transaction is mentioned below lets unite covid dmknriwing	Positive Coping	seeking social support		0	0.066667	0.079	0	0.921	0.4767	4	0	23	0	177	301	3839	1	10	0
59	59	1.39751e+18	2021-05-26	kuwait_moh drbaselalsabah You are with us tco gyfgjvqbb	Al Mahboula	abdulaziz almouli	ارسنالي .... ❤️ Arsenal @arsenal	kuwait_moh drbaselalsabah us	Negative Coping		denial	0	0	0	0	1	0	1	1	1	0	335	372	7453	0	10	1
58	58	1.39787e+18	2021-05-27	hamadd kuwait_moh Next week we will complete months and then nothing will happen	Al Mahboula	Mohammed Alhussaini	mechanical engineer .. على سطوح ادونيس comrade.. امثل نفسي فقط	hamadd kuwait_moh next week complete months nothing happen	Negative Coping		avoidance	0.05	0.2	0	0	1	0	0	0	0	0	122	169	8701	1	11	1
521	521	1.4e+18	2021-06-02	@Sajjjmiii That is so freaking true. We need a break from corona and work.	Al Sharq	Hamad Bahrouh	Totti is #1 Romanista. Half Breed. سپاسگزارم 🌸 Egalitarianism. Trilingual. Rocker. Sarcastic. Secular. Forza Roma & Boomer Sooner	that is so freaking true we need a break from corona and work	Positive Coping	positive reframing		0.35	0.65	0.174	0.204	0.622	-0.1376	0	0	0	0	691	595	66286	8	7	0
520	520	1.40008e+18	2021-06-02	@The_PattayaNews hello, I have a question about reopening Phuket for tourism on July. I heard that there will be no quarantine is it true? And are they going to open everything in Phuket on July? Malls, cafes, restaurants, etc.	Khairan Residential	روان الفهد		hello i have a question about reopening phuket for tourism on july i heard that there will be no quarantine is it true and are they going to open everything in phuket on july malls cafes restaurants etc	Positive Coping	seeking social support		0.175	0.575	0.068	0.054	0.878	0.1531	0	0	0	0	209	294	14644	2	13	0
519	519	1.40094e+18	2021-06-04	And I totally agree with Dr in demand that current COVID-19 Pandemic Doctors are suffering! It’s already been stressful and this NLE will make it more worse, at least an online module and exam like @NBRC_tweets and documenting CME will solve the problem 3/3.	Hawalli	Aamir Raheem	Respiratory Therapist| Healthcare manager| retweets doesn't mean endorsement!	and i totally agree with dr in demand that current covid pandemic doctors are suffering its already been stressful and this nle will make it more worse at least an online module and exam like and documenting cme will solve the problem	Positive Coping	seeking social support		-0.04	0.53	0.129	0.254	0.617	-0.7845	0	0	1	0	792	631	53902	33	22	0
518	518	1.40114e+18	2021-06-05	In most things success depends on knowing how long it takes to succeed. - Charles de Montesquieu #الكويت #صباح_الخير #اقتباسات #مساء_الخير #رياضه #سياحه #كورونا #kuwait #Quotes #travel #sport #Bitcoin #corona #Twitter	Siddiq	Ahmed alkhlefe | احمد حسن الخليفى	✌️ɪ ʙᴇʟɪᴇᴠᴇ ɪ ᴄᴀɴ ғʟʏ | ᴡᴏʀʟᴅ ᴄʜᴀᴍᴘɪᴏɴ🥇🥈🥉ɪɴᴛᴇʀɴᴀᴛɪᴏɴᴀʟ ᴄᴏᴀᴄʜ & ʀᴇғᴇʀᴇᴇ | 🇰🇼ᴋᴜᴡᴀɪᴛ ᴛᴋᴅ ᴘᴏᴏᴍꜱᴇᴀ ɴᴀᴛɪᴏɴᴀʟ ᴛᴇᴀᴍ | ᴘʀᴇꜱɪᴅᴇɴᴛ: 𝐊𝐔𝐓𝐊𝐂 Vɪᴄᴇ ᴘʀᴇꜱ: 𝐀𝐑𝐔𝐊𝐅	in most things success depends on knowing how long it takes to succeed charles de montesquieu kuwait quotes travel sport bitcoin corona twitter	Positive Coping	positive reframing		0.25	0.3	0.255	0	0.745	0.8008	0	0	0	0	1636	0	14640	1	11	0
517	517	1.4014e+18	2021-06-06	@usembislamabad It will sure help our healthcare staff in protection against COVID, and will help in equipping our critical care but more doses of vaccine will solve the problem as we lag behind on vaccination rate compared to others!	Al Jabriyah	Aamir Raheem	Respiratory Therapist| Healthcare manager| retweets doesn't mean endorsement!	it will sure help our healthcare staff in protection against covid and will help in equipping our critical care but more doses of vaccine will solve the problem as we lag behind on vaccination rate compared to others	Positive Coping	positive reframing		0.15	0.722222	0.201	0.173	0.626	-0.1655	0	0	0	0	792	631	53902	33	4	0
515	515	1.40179e+18	2021-06-07	@Sinyar_Q8 نعم اطعم Can I get AstraZeneca now and Pfizer later? Why mixing and matching COVID vaccines could help solve many rollout problems - https://t.co/eYhFXzIQmh	Al Rumaithiya	entesar ALq		can i get astrazeneca now and pfizer later why mixing and matching covid vaccines could help solve many rollout problems	Positive Coping	seeking social support		0.25	0.25	0.186	0.112	0.702	0.2023	1	0	0	0	225	614	2842	0	6	0
516	516	1.40178e+18	2021-06-07	Waiting for my covid test results in order to get on the plane back on the states probably the was the longest 15 mins...	Aeraifjan	The Son of a Sheppard	Tarik🇩🇴 OΓ Nupe♦️ FAU Alumni📚 US Army🇺🇸 IG📷 : Da1tail	waiting for my covid test results in order to get on the plane back on the states probably the was the longest mins	Positive Coping	engaging in relaxation techniques		0	0	0	0	1	0	0	0	2	0	334	383	1419	1	6	0
514	514	1.40183e+18	2021-06-07	COVID-19 TEST 🙂💔	Mazaya ( Global Med Clinic )	بُو يَاسًٌُُيَن	إِنَّ الحُسَيْنَ مِصْباحُ الهُدىٰ وسَفينةُ النَجاةْ | اللهم ارحم والدي حسن طاهر الحرز واغفرله.	covid test sly smiling face broken heart	Positive Coping	engaging in relaxation techniques		-0.28333	0.283333	0.503	0.206	0.291	0.6213	0	0	0	0	1056	177	80883	7	9	0
513	513	1.40432e+18	2021-06-14	@tonispice I am going straight to Dubai as my partner lives there. I will miss my family over the summer though, but it is the most sensible thing for me to do. And I am getting my second vaccine tomorrow so it's all worked out so well ☺️☺️!	Al Mahboula	Georgia Duncan 🇦🇪	Year 3 🦉| Dubai 🇦🇪🌍| Previously taught in Kuwait 🇰🇼 for 2️⃣ years| @Seesaw ambassador 💻 | Passionate about reading 📚 & wellbeing 🌿 Religious Studies BA	i am going straight to dubai as my partner lives there i will miss my family over the summer though but it is the most sensible thing for me to do and i am getting my second vaccine tomorrow so its all worked out so well smiling face smiling face	Positive Coping	positive reframing		0.233333	0.3	0.225	0.022	0.753	0.9213	0	1	0	0	1577	1160	1758	2	5	0
56	56	1.40493e+18	2021-06-15	kuwait_moh drbaselalsabah We have Twitter TV We know the benefits of vaccination that people return to normal life tcor pngdif w	Al Mahboula	abdulaziz almouli	ارسنالي .... ❤️ Arsenal @arsenal	kuwait_moh drbaselalsabah twitter tv know benefits vaccination people return normal life	Positive Coping	positive reframing		0.15	0.65	0.115	0	0.885	0.3818	0	0	0	0	335	372	7453	0	22	0
57	57	1.40492e+18	2021-06-15	Can you tell the vaccination rate? Two doses in Kuwait. One dose is the number required to return to normal life. kuwait_moh drbaselalsabah	Al Mahboula	abdulaziz almouli	ارسنالي .... ❤️ Arsenal @arsenal	tell vaccination rate two doses kuwait one dose number required return normal life kuwait_moh drbaselalsabah	Positive Coping	seeking social support		0.15	0.65	0.056	0	0.944	0.0772	0	4	0	0	335	372	7453	0	21	0
512	512	1.40511e+18	2021-06-16	Officially fully vaccinated meaning our quarantine will now be 14 days and not 21 days in Hong Kong 🥳🇭🇰 https://t.co/VXwpdoKgcW	Al Mahboula	Miss Eleonore 🇭🇰🇰🇼	Year 1 Teacher abroad ✈️ |📍Hong Kong 🌟🇭🇰 | 3 years in Kuwait 🇰🇼 | Blogging my expat journey 🌏 | Primary Education with Music graduate - UOR🌈👩‍🎓	officially fully vaccinated meaning our quarantine will now be days and not days in hong kong partying face hong kong sar china	Positive Coping	positive reframing		0	0	0.11	0	0.89	0.3818	0	1	21	0	796	710	345	1	10	0
54	54	1.40552e+18	2021-06-17	Where is the community immunity vaccination? What is the benefit of the vaccine? Now I am afraid that you will give me salt. kuwaiticm kuwait_moh drbaselalsabah tco n xtgibh	Al Mahboula	abdulaziz almouli	ارسنالي .... ❤️ Arsenal @arsenal	community immunity vaccination benefit vaccine afraid give salt kuwaiticm kuwait_moh drbaselalsabah	Negative Coping		denial	-0.6	0.9	0.107	0	0.893	0.5204	0	0	0	0	335	372	7453	0	13	1
55	55	1.40545e+18	2021-06-17	The world has opened, life is normal. Community immunity has been achieved. For now, we are smoking shisha and coffee shops. We are thinking about a partial ban. kuwaiticm kuwait_moh	Al Mahboula	abdulaziz almouli	ارسنالي .... ❤️ Arsenal @arsenal	world opened life normal community immunity achieved now smoking shisha coffee shops thinking partial ban kuwaiticm kuwait_moh	Negative Coping		denial	0.025	0.475	0	0.11	0.89	-0.5574	0	0	0	0	335	372	7453	0	8	1
507	507	1.40564e+18	2021-06-17	Taking the vaccine counts as being “responsible.” Ignorance, on the other hand, is the definition of the far extreme.	Al Adailiya	أفنان عادل المسيليم	A published author 📕 | #CFC	taking the vaccine counts as being responsible ignorance on the other hand is the definition of the far extreme	Positive Coping	positive reframing		0.0125	0.73125	0.229	0.104	0.667	0.4588	0	0	0	0	1476	607	48350	18	21	0
511	511	1.40553e+18	2021-06-17	Music to my ears 🎶 TAKING THE VACCINE IS ESSENTIAL ✔️ 💉 https://t.co/79tp3w7PZi	Al Adailiya	أفنان عادل المسيليم	A published author 📕 | #CFC	music to my ears musical notes taking the vaccine is essential check mark syringe	Positive Coping	positive reframing		0	0.15	0	0	1	0	1	0	0	0	1476	607	48350	18	14	0
510	510	1.40553e+18	2021-06-17	Anti-vaxxers have no claim nor ground to debate. Stop the ignorance. Educate yourself. Save lives. And take the vaccine!	Al Adailiya	أفنان عادل المسيليم	A published author 📕 | #CFC	antivaxxers have no claim nor ground to debate stop the ignorance educate yourself save lives and take the vaccine	Positive Coping	positive reframing		0	0	0.127	0.275	0.598	-0.4019	1	0	0	0	1476	607	48350	18	14	0
509	509	1.40556e+18	2021-06-17	second vaccine 🦠💉	ارض المعارض قاعه 5	Ghazlan K	الحمدُلله دائماً وابداً | remember me whenever you see the clouds	second vaccine microbe syringe	Positive Coping	engaging in relaxation techniques		0	0	0	0	1	0	0	0	0	0	215	207	905	2	16	0
508	508	1.40562e+18	2021-06-17	Photography 101 #kuwait #mahboula #photograghy #2021 #june #architecture #Building #StayHomeStaySafe #Covid_19 #COVIDVaccination https://t.co/SWe7T1Vt7g	Al Mahboula	SKY	OFW🇵🇭🇰🇼🇧🇭🇬🇪🇦🇲	photography kuwait mahboula photograghy june architecture building stayhomestaysafe covid covidvaccination	Positive Coping	engaging in relaxation techniques		0	0	0	0	1	0	0	0	0	0	106	131	549	0	20	0
506	506	1.40587e+18	2021-06-18	People like that help us recognize that it’s possible to live that way by taking off our social masks that would cover up our authentic selves so that we “fit in” with others.	Qortuba	Meshal	take responsibility, love. dispel darkness.	people like that help us recognize that its possible to live that way by taking off our social masks that would cover up our authentic selves so that we fit in with others	Positive Coping	positive reframing		0.213939	0.543333	0.21	0	0.79	0.7884	0	1	1	0	360	626	16253	3	12	0
505	505	1.40587e+18	2021-06-18	We’ve all forgotten that we’re all naturally pure and gentle within. And it’s that inner nature of ours that helps us connect to the hearts and souls of those around us, rather than the mental masks we use to fit in and be accepted by society.	Qortuba	Meshal	take responsibility, love. dispel darkness.	weve all forgotten that were all naturally pure and gentle within and its that inner nature of ours that helps us connect to the hearts and souls of those around us rather than the mental masks we use to fit in and be accepted by society	Positive Coping	positive reframing		0.142857	0.413333	0.256	0.034	0.71	0.91	0	1	1	0	360	626	16253	3	12	0
504	504	1.40593e+18	2021-06-18	It was a successful covid-19 vaccine campaign 👍👍 https://t.co/7sz2LPGlqm	Sabah Al Salem	Kinley Sarwa	Be yourself! Everything happens for a reason 😉😉	it was a successful covid vaccine campaign thumbs up thumbs up	Positive Coping	positive reframing		0.75	0.95	0.275	0	0.725	0.5859	0	0	0	0	14	11	3	0	17	0
503	503	1.40858e+18	2021-06-26	@ronnieliang Am still fighting now for Covid-19.	Jaber Al Ali	Rolibeth Alburo	Create your own be positive always	am still fighting now for covid	Positive Coping	positive reframing		0	0	0	0.333	0.667	-0.3612	0	0	0	0	0	41	78	0	0	0
502	502	1.40874e+18	2021-06-26	@iiabdullaii 😂😂😂😂😂 That’s the real covid vaccine	Hadiya	حصّــه هـادي الهــاجري	Medical doctor—RCSI | bonappe.tea | hajeriart | اللهم ارحم ابي حبيبي.	face with tears of joy face with tears of joy face with tears of joy face with tears of joy face with tears of joy thats the real covid vaccine	Positive Coping	mindfullness practices		0.7	0.216667	0.392	0.196	0.412	0.926	0	1	0	0	985	488	28444	0	10	0
500	500	1.40887e+18	2021-06-26	Just had the worst on call since I started in Covid wards, this wave is unlike anything we’ve experienced the past year, please get vaccinated... والله نصيحة من قلب	Al Sharq	Dr. Abdulaziz Almazyed	Medical Doctor @AmiriHospital | BMBS, BMedSci @uniofnottingham	just had the worst on call since i started in covid wards this wave is unlike anything weve experienced the past year please get vaccinated	Positive Coping	positive reframing		-0.15	0.716667	0.078	0.139	0.782	-0.4215	2	1	5	0	352	314	3477	8	19	0
501	501	1.40878e+18	2021-06-26	Live from #londonprotest “Freedom” No more masks No more vaccines No covid passports Enough is enough We are done https://t.co/htbiP05Jmb	Al Khaldiya	بدر الظفيري	“A person who never made a mistake never tried anything new.” (Albert Einstein) My instagram account @ilbedry .. Gust MBA '17 .. KU '09 🇰🇼	live from londonprotest freedom no more masks no more vaccines no covid passports enough is enough we are done	Negative Coping		wishful thinking	-0.07273	0.5	0.159	0.272	0.569	-0.2398	1	0	5	0	1062	294	14739	2	13	1
498	498	1.40918e+18	2021-06-27	Do Not take the vaccine! It kills children	Al Shuhada	Aziz.	Drummer 🥁 - Music lover 🎶🎸 - Video Gamer 🎮 / - *PSN*: ROOCKER	do not take the vaccine it kills children	Negative Coping		venting of emotions	0	0	0	0.333	0.667	-0.5423	0	1	1	1	331	390	17294	3	15	1
499	499	1.40896e+18	2021-06-27	Nothing to do in kuwait but walk around the malls and now you won't be able to do that unless you've had the Chinese virus vaccine 🤦🏻‍♂️...guess I'll just be watching the markets 📊📈🤷🏻‍♂️ https://t.co/mxo2RfSH2P	Al Mahboula	Game of coins	crypto enthusiasts and AMC 🦍	nothing to do in kuwait but walk around the malls and now you wont be able to do that unless youve had the chinese virus vaccine man facepalming guess ill just be watching the markets bar chart chart increasing man shrugging	Negative Coping		denial	0.16	0.605	0	0.074	0.926	-0.5719	0	0	0	0	88	677	1140	9	1	1
497	497	1.40979e+18	2021-06-29	Covid-19 is not a joke, not a conspiracy theory, not to track us, not to kill us… go and get the vaccine… Don't wait until you lose someone dear to you…	Al Jabriyah	Athbi Aloraifan	dancing by my own… 🇰🇼 🇷🇴 🇶🇦 SC: Great_Athbi 📍Doha - Qatar	covid is not a joke not a conspiracy theory not to track us not to kill us go and get the vaccine dont wait until you lose someone dear to you	Positive Coping	positive reframing		0	0	0.23	0.116	0.655	0.6732	0	0	0	0	313	455	17096	1	8	0
495	495	1.41206e+18	2021-07-05	Get Vaccine to End COVID-19💉	Kuwait Vaccination Center مركز الكويت للتطعيم	𝑀	Civil Engineering	get vaccine to end covid syringe	Positive Coping	positive reframing		0	0	0	0	1	0	0	0	0	0	476	140	27351	1	14	0
496	496	1.41191e+18	2021-07-05	First flight since the pandemic 🥺✈ https://t.co/gX458lVfFc	Airport Area	A	👩‍💻🐈🛫	first f since the pandemic pleading face airplane	Positive Coping	engaging in relaxation techniques		0.25	0.333333	0	0	1	0	0	1	4	0	109	141	29076	11	4	0
494	494	1.41271e+18	2021-07-07	@KUWAIT_MOH fix your fuckin app plz ,it's frustrating already	Zahra	Aziz.	Drummer 🥁 - Music lover 🎶🎸 - Video Gamer 🎮 / - *PSN*: ROOCKER	fix your fuckin app plz its frustrating already	Negative Coping		venting of emotions	-0.4	0.9	0.151	0.277	0.573	-0.323	0	0	0	0	331	390	17294	3	10	1
493	493	1.41279e+18	2021-07-07	Super proud of all the pregnant ladies that went and received their vaccine today 💕	Al Shuhada	حوراء حسن المتروك	ҫнакиоом 🧜🏻‍♀️ قل الحكي أحيان ... من كثر الإحساس	super proud of all the pregnant ladies that went and received their vaccine today two hearts	Positive Coping	positive reframing		0.488889	0.722222	0.465	0	0.535	0.9062	0	0	10	0	1709	1273	37359	8	14	0
491	491	1.41315e+18	2021-07-08	First Vaccine 💉	ارض المعارض قاعه 5	⚔️⏳	وَسِيقَ الَّذِينَ اتَّقَوْا رَبَّهُمْ إِلَى الْجَنَّةِ زُمَرًا | اللهُمَّ إِنِّي أَعْتَذِرُ إليكَ من مظلومٍ ظُلِمَ بحضرتِي فَلَم أَنْصُره #القدس_عاصمة_فلسطين	first vaccine syringe	Positive Coping	engaging in relaxation techniques		0.25	0.333333	0	0	1	0	0	0	0	1	9420	2597	24179	4	14	0
492	492	1.41309e+18	2021-07-08	COVID-19 wards 😷 https://t.co/Cu4vAhl9av	مستشفى الرازي لجراحة العظام	Fatemah..❤️💙	Radiographer @ alrazi hospital 💀...	covid wards face with medical mask	Negative Coping		venting of emotions	0	0	0	0	1	0	0	0	0	0	233	73	7176	0	11	1
53	53	1.41455e+18	2021-07-12	drbaselalsabah kuwait_moh kuwaiticm I hope you are with us on the same planet tcomaep kwdiu	Al Mahboula	abdulaziz almouli	ارسنالي .... ❤️ Arsenal @arsenal	drbaselalsabah kuwait_moh kuwaiticm hope us planet	Negative Coping		denial	0	0.125	0.172	0	0.828	0.4404	0	0	0	0	335	372	7453	0	11	1
490	490	1.4157e+18	2021-07-15	My life before COVID-19 💔: https://t.co/8hvPiOaRoS	Al Salmiyah	MB	.--. .- .. -.	my life before covid broken heart	Negative Coping		wishful thinking	-0.4	0.4	0.372	0.274	0.354	0.2732	0	0	1	0	106	79	769	0	15	1
488	488	1.41613e+18	2021-07-16	Sometimes I wish I could unsee the things I’ve seen in Covid wards	Hitteen	Dr. Abdulaziz Almazyed	Medical Doctor @AmiriHospital | BMBS, BMedSci @uniofnottingham	sometimes i wish i could unsee the things ive seen in covid wards	Negative Coping		wishful thinking	0	0	0.184	0	0.816	0.4019	2	0	1	0	352	314	3477	8	20	1
489	489	1.41602e+18	2021-07-16	@AcademyKat I have a vaccination certificate. I enter any country in the world. There is no problem.	Hawalli	Golden Boy.	My name is Falah, who is known as the Golden Boy. He plays boxing, wrestling and leather.	i have a vaccination certificate i enter any country in the world there is no problem	Positive Coping	positive reframing		0	0	0.131	0	0.869	0.3089	0	0	0	0	481	2903	2727	3	12	0
487	487	1.41633e+18	2021-07-17	VACANCIES: REMOVALISTS NEEDED. ESSENTIAL: Must be able to drive across state borders; IQ must be below 50; Able to work without a mask. DESIRABLE: Be Covid+ or willing to become infectious; Display wanton disregard for public health rules. Contact @GladysB /@NSWHealth #covidnsw	Al Salmiyah	Ross Appleby	Aussie Ex-pat, mad Collingwood fan, living in the desert.	vacancies removalists needed essential must be able to drive across state borders iq must be below able to work without a mask desirable be covid or willing to become infectious display wanton disregard for public health rules contact covidnsw	Positive Coping	mindfullness practices		0.25	0.473333	0	0.099	0.901	-0.47	0	0	0	0	151	178	1101	3	9	0
486	486	1.41638e+18	2021-07-17	There are protests all over France today against mandatory vaccinations of healthcare workers and mandatory vaccine passes to go more or less anywhere, even your local cafe! #PharmaFascism #MedicalApartheid https://t.co/7R03jmKOQ0	Al Khaldiya	بدر الظفيري	“A person who never made a mistake never tried anything new.” (Albert Einstein) My instagram account @ilbedry .. Gust MBA '17 .. KU '09 🇰🇼	there are protests all over france today against mandatory vaccinations of healthcare workers and mandatory vaccine passes to go more or less anywhere even your local cafe pharmafascism medicalapartheid	Positive Coping	engaging in relaxation techniques		0.111111	0.188889	0.085	0.062	0.852	-0.0772	5	0	5	1	1062	294	14739	2	13	0
484	484	1.41674e+18	2021-07-18	finally getting my covid vaccine today	مركز الفردوس الشمالي الصحي	نــ	KU | الحمدالله	finally getting my covid vaccine today	Positive Coping	engaging in relaxation techniques		0	1	0	0	1	0	0	0	0	0	225	244	2436	0	12	0
483	483	1.41684e+18	2021-07-18	@HashemGhaili this might interest you for more investigation.. Covishield the Indian manufacturered Oxford Astrazeneca vaccine found to be creating training camps to enable search and kill T cells to destroy even new variants pf SARS-COV-2 @NatureGeosci @SerumInstIndia @Nature	Al Mahboula	Pritish Mukherjee 🇮🇳🙏🏽	Professionally Petroleum Geologist, an Integrator, conceptual guidance, technology seeker, multi-disciplinarian- Indian 1st, proud nationalist, Chelsea fan	this might interest you for more investigation covishield the indian manufacturered oxford astrazeneca vaccine found to be creating training camps to enable search and kill t cells to destroy even new variants pf sarscov	Positive Coping	mindfullness practices		0.145455	0.318182	0.12	0.189	0.691	-0.6124	0	0	0	0	133	286	1220	2	19	0
482	482	1.41684e+18	2021-07-18	..Disaster of corona war and climate war will surely intensify. Imam Mahdi Nasser Mohammad Al-Yemeni 21 - Ramadan - 1442 AH 03 - 05 - 2021 AD 12:35 pm https://t.co/5xeUKIuMak 5 #قارعه_حرب_كورونا_وحرب_المناخ #يوم_عرفه j%ILSU	Kuwait	Nasertnaser	صفحة لبعض بيانات الامام المهدي المنتظر الحق الامام ناصر محمد اليماني	disaster of corona war and climate war will surely intensify imam mahdi nasser mohammad alyemeni ramadan ah ad pm jilsu	Negative Coping		denial	0.5	0.888889	0.094	0.386	0.519	-0.875	0	0	0	0	117	40	2372	0	19	1
481	481	1.41684e+18	2021-07-18	..Disaster of corona war and climate war will surely intensify. Imam Mahdi Nasser Mohammad Al-Yemeni 21 - Ramadan - 1442 AH 03 - 05 - 2021 AD 12:35 pm https://t.co/mWzBPXOtxf 106 #قارعه_حرب_كورونا_وحرب_المناخ #حقهم_علينا EblMyd	The Sea Front	غايتي رضوان الله		disaster of corona war and climate war will surely intensify imam mahdi nasser mohammad alyemeni ramadan ah ad pm eblmyd	Negative Coping		denial	0.5	0.888889	0.094	0.386	0.519	-0.875	1	0	1	0	150	180	21758	0	19	1
485	485	1.41674e+18	2021-07-18	A request 🙏🏻 @DrSJaishankar @indembkwt @AmbSibiGeorge Sir can you please take up the issue of Indian expats stuck in India getting Covishield vaccine with Kuwait MoH. It looks its not clear if Covishield is accepted by Kuwait MoH despite it being same as AstraZeneca vaccine.	Kuwait	sadiq		a request folded hands sir can you please take up the issue of indian expats stuck in india getting covishield vaccine with kuwait moh it looks its not clear if covishield is accepted by kuwait moh despite it being same as astrazeneca vaccine	Positive Coping	seeking social support		0.116667	0.402778	0.087	0.083	0.83	0.0557	0	0	0	0	19	179	13	0	12	0
480	480	1.41822e+18	2021-07-22	@indembkwt If it is like what is mentioned what prevents MoH kuwait to issue an official order declaring that covishield certificate will be treated equivalent to Oxford Astrazeneca?	Al Mahboula	Pritish Mukherjee 🇮🇳🙏🏽	Professionally Petroleum Geologist, an Integrator, conceptual guidance, technology seeker, multi-disciplinarian- Indian 1st, proud nationalist, Chelsea fan	if it is like what is mentioned what prevents moh kuwait to issue an official order declaring that covishield certificate will be treated equivalent to oxford astrazeneca	Negative Coping		avoidance	0	0	0.132	0	0.868	0.4215	0	0	0	0	133	286	1220	2	14	1
478	478	1.41866e+18	2021-07-23	When will we stop wearing masks?!	Al Shuhada	حوراء حسن المتروك	ҫнакиоом 🧜🏻‍♀️ قل الحكي أحيان ... من كثر الإحساس	when will we stop wearing masks	Negative Coping		wishful thinking	0	0	0	0.306	0.694	-0.296	0	2	2	1	1709	1273	37359	8	20	1
479	479	1.41861e+18	2021-07-23	Hello @DrAlsaeid, There are tens of thousands of #Stateless persons (#Bidoon) who can't register for vaccination on @KUWAIT_MOH's website. This is literally a death sentence for them &amp; their loved ones. 🛑Get them a solution #iBelong @USEmbassyQ8 @USAmbKuwait @ukinkuwait	Mubarak Al Kabeer	Abdullah Sh Marafi	ديني لنفسي ودين الناس للناسِ #البدون_أولوية 🇵🇸🇰🇼	hello are tens of thousands of stateless persons bidoon who cant register for vaccination on website this is literally a death sentence for them amp their loved ones stop sign get them a solution ibelong	Positive Coping	seeking social support		0.7	0.8	0.172	0.14	0.688	0.1027	11	1	4	0	10153	1293	135351	29	16	0
477	477	1.41876e+18	2021-07-24	Good morning Everyone after long time we are feeling boring How or when Corona will fineshed	Hawalli	Ganesh sharma	I am working Movenpick Hotel As a Restaurant Managar in Kuwait 2012 until 2020	good morning everyone after long time we are feeling boring how or when corona will fineshed	Negative Coping		wishful thinking	-0.11667	0.666667	0.223	0.117	0.66	0.2732	0	0	0	0	15	79	44	0	2	1
476	476	1.41941e+18	2021-07-25	A day to remember 🎓🤍🎞 #remember #graduation #kuniv #kuwaituniversity #science #corona @ Jabriya, Kuwait https://t.co/yETqq0tVPO	Al Jabriyah	جَ🌴	I'm not good but better than others ..💜	a day to remember graduation cap white heart film frames remember graduation kuniv kuwaituniversity science corona jabriya kuwait	Positive Coping	engaging in relaxation techniques		0	0	0.198	0	0.802	0.6369	0	0	1	0	27178	4265	116620	19	21	0
475	475	1.41993e+18	2021-07-27	@AntschaProduct1 @BiancaBlance Girls, I thank God that you are fine and in good health. You were not affected by the virus, the Corona virus. Say thank God, thank God without these things. Pictures, videos and wrestling while you are naked Do good deeds. Say thank God, this is the most important thing in a per	Mubarak Al Kabeer	Golden Boy.	My name is Falah, who is known as the Golden Boy. He plays boxing, wrestling and leather.	girls i thank god that you are fine and in good health you were not affected by the virus the corona virus say thank god thank god without these things pictures videos and wrestling while you are naked do good deeds say thank god this is the most important thing in a per	Positive Coping	mindfullness practices		0.452778	0.6	0.425	0	0.575	0.9737	0	0	0	0	481	2903	2727	3	8	0
474	474	1.41997e+18	2021-07-27	@KUWAIT_MOH , can u please advice why i got this information at site when i was trying to update or modify my information at moh site. Even still i didn't get any sms or schedule from ministry for my vaccine. https://t.co/EjGFWRgm0o	Al Mirqab	Vikash Sharma~(Vicky)	Enjoy Today.. Coz yesterday hv gone.. & tomorrow may never come..	can u please advice why i got this information at site when i was trying to update or modify my information at moh site even still i didnt get any sms or schedule from ministry for my vaccine	Positive Coping	seeking social support		0	0	0.059	0	0.941	0.3182	0	0	0	0	25	271	617	0	10	0
473	473	1.42012e+18	2021-07-27	@Hasan_Alrasheed @BioIntegrate Maybe after the South Korean and British study of giving pfizer shot after AZ first shot showed higher antibody response. https://t.co/C2lIsce1y4	Al Salam	رشا سنان	Beauty is a state of mind 😌🧘‍♀️ I'm the doctor next door 😄😁 مساحة أعبّر فيها عن نفسي، و لستُ أنتقد شخص أحد.	maybe after the south korean and british study of giving pfizer shot after az first shot showed higher antibody response	Positive Coping	positive reframing		0.166667	0.277778	0.112	0	0.888	0.34	0	0	1	0	1188	583	25718	11	20	0
472	472	1.42097e+18	2021-07-30	@Kuwait_DGCA @KUWAIT_MOH Can we have a straight answer Yes or No to this.. can an Indian with valid residency in kuwait, enter Kuwait having Covishield Vaccine? Yes No Ref.. the order issued 2 days back which doesn't mention covishield in approved list. #CovishieldVaccine	Al Mahboula	Pritish Mukherjee 🇮🇳🙏🏽	Professionally Petroleum Geologist, an Integrator, conceptual guidance, technology seeker, multi-disciplinarian- Indian 1st, proud nationalist, Chelsea fan	can we have a straight answer yes or no to this can an indian with valid residency in kuwait enter kuwait having covishield vaccine yes no ref the order issued days back which doesnt mention covishield in approved list covishieldvaccine	Negative Coping		avoidance	0.1	0.2	0.208	0.091	0.701	0.6908	0	0	0	0	133	286	1220	2	5	1
471	471	1.42137e+18	2021-07-31	One of the best thing you can do in times of quarantine 😀 get yourself busy dancing with Taehyung 😘👍❤️ #bts #BTS #BTS_TWT https://t.co/xENqHm2yir	Al Jahra	mystic4	it’s not the future that you’re afraid of.. it’s repeating the past that makes you anxious 😘❤️ chess , coffee and Kim Taehyung are my happy pill 😘😂	one of the best thing you can do in times of quarantine grinning face get yourself busy dancing with taehyung face blowing a kiss thumbs up red heart bts bts bts twt	Positive Coping	engaging in relaxation techniques		0.366667	0.2	0.329	0	0.671	0.9287	0	0	2	0	27	232	503	0	7	0
470	470	1.42737e+18	2021-08-16	@alharbi_husain Yeah man the pandemic ruined my social life 😂😂. I'm surviving what about you?	Abu Ftaira	Hamad Bahrouh	Totti is #1 Romanista. Half Breed. سپاسگزارم 🌸 Egalitarianism. Trilingual. Rocker. Sarcastic. Secular. Forza Roma & Boomer Sooner	yeah man the pandemic ruined my social life face with tears of joy face with tears of joy im surviving what about you	Positive Coping	mindfullness practices		0.544444	0.155556	0.344	0.198	0.458	0.7269	0	1	1	0	691	595	66286	8	20	0
469	469	1.42806e+18	2021-08-18	@seemz80 @KUWAIT_MOH @Kuwait_DGCA @indembkwt @AmbSibiGeorge @MOS_MEA @DrSJaishankar Who what and when is there in the order ... as usual partial clarity. When you need to take your brain 🧠	Al Mahboula	Pritish Mukherjee 🇮🇳🙏🏽	Professionally Petroleum Geologist, an Integrator, conceptual guidance, technology seeker, multi-disciplinarian- Indian 1st, proud nationalist, Chelsea fan	who what and when is there in the order as usual partial clarity when you need to take your brain brain	Negative Coping		avoidance	-0.175	0.275	0.119	0	0.881	0.4019	0	0	0	0	133	286	1220	2	18	1
468	468	1.42806e+18	2021-08-18	@syedfraz @seemz80 @KUWAIT_MOH @Kuwait_DGCA @indembkwt @AmbSibiGeorge @MOS_MEA @DrSJaishankar @KuwaitiCM Did cabinet decide to start direct flights from India in todays meeting. Lots of media and blog news so far. Appreciate if you can confirm	Al Mahboula	Pritish Mukherjee 🇮🇳🙏🏽	Professionally Petroleum Geologist, an Integrator, conceptual guidance, technology seeker, multi-disciplinarian- Indian 1st, proud nationalist, Chelsea fan	did cabinet decide to start direct fs from india in todays meeting lots of media and blog news so far appreciate if you can confirm	Positive Coping	seeking social support		0.1	0.7	0.11	0	0.89	0.4549	0	1	0	0	133	286	1220	2	18	0
466	466	1.42831e+18	2021-08-19	@cakesnlffer @TubboUpdatess He said on his Instagram that he’s out of quarantine	Abdullah Al Mubarak - West Jleeb	Phutopia	No	he said on his instagram that hes out of quarantine	Positive Coping	positive reframing		0	0	0	0	1	0	0	0	1	0	10	197	517	0	11	0
465	465	1.42849e+18	2021-08-19	@ZuluMuster @PatsKarvelas OMG! You take the prize for the most stupid statement concerning Covid. So NSW is doing a good job? It’s Delta? If she’d gone early, Delta would not be ravishing half of Australia. Too much Sky After Dark perhaps?	Al Salmiyah	Ross Appleby	Aussie Ex-pat, mad Collingwood fan, living in the desert.	omg you take the prize for the most stupid statement concerning covid so nsw is doing a good job its delta if shed gone early delta would not be ravishing half of australia too much sky after perhaps	Negative Coping		venting of emotions	0.054762	0.452381	0.135	0.08	0.784	0.3626	1	0	6	0	151	178	1101	3	22	1
467	467	1.42819e+18	2021-08-19	Twitter is testing a new tool that allows its users to report content that may contain misleading information, a scourge that has worsened since the start of the (Covid-19) pandemic, and through its account dedicated to information security, https://t.co/g5WvTqoIMe	Al Nuzha	عَبْداللَطِيف اِلِرزيحان🇰🇼	الله ثم،الوطن،الأمير	twitter is testing a new tool that allows its users to report content that may contain misleading information a scourge that has worsened since the start of the covid pandemic and through its account dedicated to information security	Positive Coping	positive reframing		0.136364	0.454545	0.12	0.124	0.756	-0.0516	1	0	1	0	313	174	2807	0	3	0
464	464	1.42868e+18	2021-08-20	@Trendnews ￼ Over 20,000 Mississippi students under quarantine after 1st week of school MARLENE LENTHANG Thu, August 19, 2021, 7:39 PM·2 min read 0:13 3:59 Mississippi doctor: ‘We are completely drained, both emotionally and physically’	Al Qurain	eden falcon	K.O.C. fire officer (retired), member of (kwwk), ex-national handball player	over mississippi students under quarantine after st week of school marlene lenthang thu august pm min read mississippi doctor we are completely drained both emotionally and physically	Negative Coping		venting of emotions	0.033333	0.397619	0	0.097	0.903	-0.4201	0	1	0	0	71	179	4348	0	11	1
463	463	1.42901e+18	2021-08-21	If anyone knows this woman, tell her Indonesia’s Health Minister relied on God for the country’s protection, and look where that got them. Covid has reminded us that there are some dumb, batshit crazy people amongst us. #COVIDIOTS #Melbourne #COVID19nsw #CovidVictoria https://t.co/lZJ8u9kZeN	Al Salmiyah	Ross Appleby	Aussie Ex-pat, mad Collingwood fan, living in the desert.	if anyone knows this woman tell her indonesias health minister relied on god for the countrys protection and look where that got them covid has reminded us that there are some dumb batshit crazy people amongst us covidiots melbourne covidnsw covidvictoria	Negative Coping		venting of emotions	-0.4875	0.7	0.046	0.124	0.83	-0.5574	0	0	0	0	151	178	1101	3	9	1
462	462	1.42901e+18	2021-08-21	Your body? Correct. No vaccine you say? Well here’s my response: no work, no school, no kinder, no entry to supermarkets and no travel on public transport or airlines. I would make vaccines compulsory to protect us from these Walking Dead Zombies with single digit IQs. #CovidVic https://t.co/kyCHvyLVXz	Al Salmiyah	Ross Appleby	Aussie Ex-pat, mad Collingwood fan, living in the desert.	your body correct no vaccine you say well heres my response no work no school no kinder no entry to supermarkets and no travel on public transport or airlines i would make vaccines compulsory to protect us from these walking dead zombies with single digit iqs covidvic	Positive Coping	problem-solving		-0.09048	0.226984	0.17	0.222	0.608	-0.6327	0	0	1	0	151	178	1101	3	9	0
461	461	1.43164e+18	2021-08-28	My random partner at gym today: I'm unconvinced about the vaccine but took it in order to come to gym. Incentives work.	Al Rawda	سيد إسماعيل بهبهاني 🇰🇼🇵🇸	باحث دكتوراة في الدراسات العربية والإسلامية - أعمل في مجال الثّقافة - أحب الحمّص والaçai. صدر لي: 'وحوش القصيدة' و'استباق أصل الأنواع' (دار آفاق) #البدون_أولوية	my random partner at gym today im unconvinced about the vaccine but took it in order to come to gym incentives work	Positive Coping	problem-solving		-0.5	0.5	0.119	0.073	0.808	0.2846	0	0	1	0	4356	501	118709	38	15	0
460	460	1.43185e+18	2021-08-29	My everyday dozes of happiness more potent than any covid vaccines 😘😂 https://t.co/4SLYjujAqY	Al Jahra	mystic4	it’s not the future that you’re afraid of.. it’s repeating the past that makes you anxious 😘❤️ chess , coffee and Kim Taehyung are my happy pill 😘😂	my everyday dozes of happiness more potent than any covid vaccines face blowing a kiss face with tears of joy	Positive Coping	mindfullness practices		0.46	0.4	0.363	0.068	0.569	0.8519	0	0	0	0	27	232	503	0	5	0
459	459	1.43312e+18	2021-09-01	@DIWaniyatAHalQ8 Making money.😈🌹 This is what we call it Covid 19 benefits.😈🌹	Al Salmiyah	eden falcon	K.O.C. fire officer (retired), member of (kwwk), ex-national handball player	making money smiling face with horns rose this is what we call it covid benefits smiling face with horns rose	Positive Coping	problem-solving		0.6	0.95	0.336	0	0.664	0.8225	0	0	0	0	71	179	4348	0	17	0
458	458	1.43328e+18	2021-09-02	I genuinely hate the fact that because of Covid I never got to have either of my two graduations.😭	Al Salmiyah	Ms Sharif📚👩🏽‍🏫	Secondary English Teacher in Kuwait🇰🇼📍 Year 9 Form Tutor| BA English Lit @UniOfHerts| PGCE English @UCL| 24. Writer. Reader. Wife💍. Traveller ✈️14.	i genuinely hate the fact that because of covid i never got to have either of my two graduations loudly crying face	Negative Coping		venting of emotions	-0.5	0.75	0	0.254	0.746	-0.7783	0	0	2	0	563	425	1507	1	4	1
457	457	1.43377e+18	2021-09-03	Pcr on arrival negative - that was the quickest quarantine ever! Now I can go and explore 😁 🇰🇼	Sabah Al Salem	Miss D Head of PE 🇰🇼	Expat teacher abroad, making tentative moves into leadership. Head of Primary PE, year 3 teacher and Inclusion Coordinator. New to Kuwait Sept 2021 🇰🇼	pcr on arrival negative that was the quickest quarantine ever now i can go and explore beaming face with smiling eyes kuwait	Positive Coping	positive reframing		-0.3	0.4	0.112	0.139	0.749	-0.1779	0	1	10	0	235	202	396	0	12	0
456	456	1.43415e+18	2021-09-04	Caviar mask + New hair cut 💇🏻‍♀️💕.	Al Jabriyah	ليريُو.	أنا الشيء الوحيد الحقيقي الذي يحدثُ هنا. لا أقتبس.	caviar mask new hair cut woman getting haircut two hearts	Positive Coping	engaging in relaxation techniques		0.268182	0.577273	0.247	0.121	0.632	0.4939	0	0	0	0	845	164	4918	1	13	0
455	455	1.43419e+18	2021-09-04	Yep-two years in a row with home finals gifts thanks to Covid. Failed both times. Big questions need to be asked about this playing group. #AFLLionsDogs #AFLFinals https://t.co/0DWfvJg0UQ	Al Salmiyah	Ross Appleby	Aussie Ex-pat, mad Collingwood fan, living in the desert.	yeptwo years in a row with home finals gifts thanks to covid failed both times big questions need to be asked about this playing group afllionsdogs aflfinals	Negative Coping		self-blame	-0.1	0.2	0.152	0.102	0.745	0.1531	0	0	0	0	151	178	1101	3	16	1
449	449	1.43487e+18	2021-09-06	Vaccination was done after a long time💉🦠	مستوصف الصديق	NAJEEBAH	الحمد لله دائماً وأبداً	vaccination was done after a long time syringe microbe	Positive Coping	engaging in relaxation techniques		-0.05	0.4	0	0	1	0	0	0	0	0	39	47	1189	0	13	0
450	450	1.43487e+18	2021-09-06	second vaccination 💉	مستوصف الزهراء | Zahraa Medical Center	ِ	Live as you like, not as they want	second vaccination syringe	Positive Coping	engaging in relaxation techniques		0	0	0	0	1	0	0	0	0	0	275	94	2195	0	13	0
453	453	1.4348e+18	2021-09-06	allergy vaccine 😷	مستشفى الراشد للحساسية	رَ	اللهم حسن الخاتمه	allergy vaccine face with medical mask	Positive Coping	engaging in relaxation techniques		0	0	0	0	1	0	0	0	0	0	61	46	885	0	8	0
452	452	1.43485e+18	2021-09-06	It's vaccination day	مركز جابر الاحمد الصحي	المها الحسيني	⚖️	its vaccination day	Positive Coping	engaging in relaxation techniques		0	0	0	0	1	0	0	0	0	0	25	88	373	0	12	0
454	454	1.4348e+18	2021-09-06	Good morning, vaccination time 💉	مركز المسايل الصحي	فّ🤍		good morning vaccination time syringe	Positive Coping	engaging in relaxation techniques		0.7	0.6	0.42	0	0.58	0.4404	0	0	5	0	1298	1110	1682	0	8	0
451	451	1.43487e+18	2021-09-06	@SforScorpio Sure and will mention that am from Pfizer family and proud 😉	Al Sharq	لولو الصغيرة	‏‏‏‏‏‏‏‏‏💕 ‏‏أمي أولاً ودائماً 💕 ‎#ياريتك مش رايح #ياريت بتبقى على طول	sure and will mention that am from pfizer family and proud winking face	Positive Coping	positive reframing		0.65	0.944444	0.329	0	0.671	0.6597	1	0	0	0	240	989	19747	0	13	0
448	448	1.43569e+18	2021-09-08	I'm at COVID-19 DRIVE THRU STATION in Al Jahra, Al Jahrah https://t.co/ePh0OK2rtj	Al Jahra	TAIF A A A A AlENEZI.✨	MED | JUST طالبه طب في خامس سنواتها ✨ماشاءالله/ King Abdullah University Hospital🩺	im at covid drive thru station in al jahra al jahrah	Positive Coping	engaging in relaxation techniques		0	0	0	0	1	0	0	0	0	0	482	191	3830	0	19	0
447	447	1.43736e+18	2021-09-13	“The CDC blog, which was originally posted in 2011, received 1,450 comments, most of which praised the agency for its creative approach to disaster preparedness.” https://t.co/i52rkMHWzY If only some people can read not even think, just read, before they open their mouths 🤦🏻‍♀️ https://t.co/I7maW2Ro8I	Mubarak Al Abdullah	زَيْنَبَ السّمَّاكZainab Alsammak	🇰🇼 Feminist, BA International Relations @AUKtweets, MA International Law @SOAS, Research Director @mudhawislist, #Intersectionality | Newton's Third Law	the cdc blog which was originally posted in received comments most of which praised the agency for its creative approach to disaster preparedness only some people can read not even think just read before they open their mouths woman facepalming	Positive Coping	mindfullness practices		0.295833	0.741667	0.126	0.081	0.793	0.3102	0	0	0	0	642	425	17122	9	10	0
446	446	1.43738e+18	2021-09-13	Made it through two Ramadans during the pandemic in one piece 🤷🏻🙏🏻 https://t.co/Jw3hBMYy9n	Al Salmiyah	سيد إسماعيل بهبهاني 🇰🇼🇵🇸	باحث دكتوراة في الدراسات العربية والإسلامية - أعمل في مجال الثّقافة - أحب الحمّص والaçai. صدر لي: 'وحوش القصيدة' و'استباق أصل الأنواع' (دار آفاق) #البدون_أولوية	made it through two ramadans during the pandemic in one piece person shrugging folded hands	Positive Coping	mindfullness practices		0.4	0.7	0	0	1	0	0	0	0	0	4356	501	118709	38	11	0
445	445	1.43738e+18	2021-09-13	Second vaccination ✅	أرض المعارض - صالة 6	عــمــوري	♊︎ https://t.co/fA5osUYaUo	second vaccination check mark button	Positive Coping	positive reframing		0	0	0	0	1	0	0	0	0	0	1501	1495	4881	0	11	0
52	52	1.43935e+18	2021-09-18	The numbers of Corona infections indicate that the epidemic will disappear soon, and that the pandemic is breathing down its neck, and the good news coincides with the return of administration and school workers in order to prepare for the school season, and here the vaccinated must be dealt with firmly, as well as continuing to implement health requirements for a safe academic year.	Al Mahboula	أحمد بودستور	إذا كنت ذا رأي فكن ذا عزيمة فإن فساد الرأي أن تترددا	numbers corona infections indicate epidemic disappear soon pandemic breathing neck good news coincides return administration school workers order prepare school season vaccinated must dealt firmly well continuing implement health requirements safe academic year	Positive Coping	mindfullness practices		0.168889	0.357778	0.113	0.027	0.86	0.7184	1	1	0	0	19226	148	9034	5	22	0
51	51	1.43949e+18	2021-09-19	Civilized countries respect freedoms. European countries and America have imposed restrictions on the unvaccinated, preventing them from entering malls, cinemas, and amusement parks, as well as schools, and preventing them from traveling because the Corona pandemic represents a danger to society, and the emergency law is applied. Kuwait alone imposes restrictions on the vaccinated.	Al Mahboula	أحمد بودستور	إذا كنت ذا رأي فكن ذا عزيمة فإن فساد الرأي أن تترددا	civilized countries respect freedoms european countries america imposed restrictions unvaccinated preventing entering malls cinemas amusement parks well schools preventing traveling corona pandemic represents danger society emergency law applied kuwait alone imposes restrictions vaccinated	Positive Coping	positive reframing		0.2	0.45	0.15	0.196	0.653	0	0	0	0	0	19226	148	9034	5	7	0
50	50	1.441e+18	2021-09-23	We believe that the Ministry of Health should undertake the free PCR examination for citizens, reduce the price to its cost in the countries of the Kingdom of Bahrain, Turkey and others only dinars, in order to facilitate the teaching staff and students who are not vaccinated in schools, and consider it among other therapeutic services.	Al Mahboula	أحمد بودستور	إذا كنت ذا رأي فكن ذا عزيمة فإن فساد الرأي أن تترددا	believe ministry health undertake free pcr examination citizens reduce price cost countries kingdom bahrain turkey others dinars order facilitate teaching staff students vaccinated schools consider among therapeutic services	Negative Coping		wishful thinking	0.091667	0.725	0.057	0	0.943	0.5106	0	0	1	0	19226	148	9034	5	11	1
49	49	1.44113e+18	2021-09-23	The Ministry of Education for the year focused on providing a safe environment and keeping schools free from the Corona virus, and did not care about the cleanliness of schools, making air conditioners, and also preparing the classrooms and painting, because teachers’ job is to teach, not to clean the classrooms, and the work is an unbearable atmosphere, so the Ministry must provide what the scho…	Al Mahboula	أحمد بودستور	إذا كنت ذا رأي فكن ذا عزيمة فإن فساد الرأي أن تترددا	ministry education year focused providing safe environment keeping schools free corona virus care cleanliness schools making air conditioners also preparing classrooms painting teacher job teach clean classrooms work unbearable atmosphere ministry must provide schools need	Negative Coping		venting of emotions	0.422222	0.666667	0.116	0.065	0.819	0.6012	0	0	1	0	19226	148	9034	5	19	1
48	48	1.44171e+18	2021-09-25	The proverb says that good is harmful. The Corona pandemic has caused thousands of expatriates to lose their jobs, most of whom are marginal workers. The real estate market has been affected. The number of people renting apartments has decreased. The airport has opened. Residency dealers have become active to bring in a larger number, and the government must fight human trafficking.	Al Mahboula	أحمد بودستور	إذا كنت ذا رأي فكن ذا عزيمة فإن فساد الرأي أن تترددا	proverb says good harmful corona pandemic caused thousands expatriates lose jobs marginal workers real estate market affected number people renting apartments decreased airport opened residency dealers become active bring larger number government must fight human trafficking	Positive Coping	positive reframing		0.12381	0.471429	0.117	0.098	0.785	0.0772	0	0	0	0	19226	148	9034	5	10	0
47	47	1.44312e+18	2021-09-29	May God forgive you Corona	Al Mahboula	﮼هيا،الزامل،القحطاني﮼	اللهم اجمعني بمن أحب على ما تُحِبّ 🤍	may god forgive corona	Negative Coping		avoidance	0	0	0.583	0	0.417	0.4939	0	2	0	0	149	140	16913	5	7	1
444	444	1.44365e+18	2021-09-30	@shitoodlebug @katherineOma This number is very small compared to the world's population of eight billions‼️.. and don't forget that the covid movie is almost two years old now‼️	Kuwait	Muhammad Habib Bushehri بوحسين	كاتب صحفي ومحاضر كويتي🇰🇼مستقل ومدير سابق لدورات اللغة في بريطانيا Kuwaiti Journalist-writer-lecturer & previous English language Admin manger at the UK	this number is very small compared to the worlds population of eight billions double exclamation mark and dont forget that the covid movie is almost two years old now double exclamation mark	Negative Coping	mindfullness practices		-0.05625	0.18	0.09	0	0.91	0.242	0	0	2	0	1177	60	7888	12	18	1
46	46	1.44458e+18	2021-10-03	Another group suffers when students return to school. There is financial suffering due to high tuition fees and health suffering, which is the difficulty of obtaining vaccination and requesting student swabs, the cost of which parents cannot afford. Therefore, we call on the government to facilitate the payment of fees for the Bidun, as well as taking the vaccine for this group.	Al Mahboula	أحمد بودستور	إذا كنت ذا رأي فكن ذا عزيمة فإن فساد الرأي أن تترددا	another group suffers students return school financial suffering due high tuition fees health suffering difficulty obtaining vaccination requesting student swabs cost parents cannot afford therefore call government facilitate payment fees bidun well taking vaccine group	Positive Coping	problem-solving		-0.14125	0.40375	0.03	0.165	0.805	-0.8625	0	0	0	0	19226	148	9034	5	8	0
45	45	1.44458e+18	2021-10-03	Media hype and fierce opposition led by an educated and cultured elite of society, doctors and teachers of the fairer sex. It is a campaign against vaccination, even though it has been scientifically proven that vaccination is the solution to eliminating the Corona epidemic. Does he know that the vaccination rate has reached this level? Is the majority who have been vaccinated concerned about the…	Al Mahboula	أحمد بودستور	إذا كنت ذا رأي فكن ذا عزيمة فإن فساد الرأي أن تترددا	media hype fierce opposition led educated cultured elite society doctors teachers fairer sex campaign vaccination even though scientifically proven vaccination solution eliminating corona epidemic know vaccination rate reached level majority vaccinated concerned health	Positive Coping	problem-solving		0	0	0.06	0	0.94	0.4696	0	0	0	0	19226	148	9034	5	8	0
44	44	1.44468e+18	2021-10-03	The country of Portugal was able to defeat the Corona epidemic by vaccinating the people, and based on this, the Portuguese government allowed the opening of activities and the return of normal life and stopped precautions, even masks, as well as the swab and PCR, and it confirms vaccination is the solution and is considered a successful model that benefits those vaccinated.	Al Mahboula	أحمد بودستور	إذا كنت ذا رأي فكن ذا عزيمة فإن فساد الرأي أن تترددا	country portugal able defeat corona epidemic vaccinating people based this portuguese government allowed opening activities return normal life stopped precautions even masks well swab pcr confirms vaccination solution considered successful model benefits vaccinated	Positive Coping	positive reframing		0.466667	0.741667	0.151	0.068	0.781	0.7096	0	0	0	0	19226	148	9034	5	15	0
43	43	1.44568e+18	2021-10-06	The Crown Prince of Abu Dhabi, Sheikh Mohammed bin Zayed, announced that the United Arab Emirates will emerge from the Corona crisis and return to normal life, based on numbers confirming that the Emirates is free of the epidemic, and after the decrease in the numbers of infections, deaths, and serious cases, care has reached a safe level. We are waiting, and the Minister of Health has the announ…	Al Mahboula	أحمد بودستور	إذا كنت ذا رأي فكن ذا عزيمة فإن فساد الرأي أن تترددا	crown prince abu dhabi sheikh mohammed bin zayed announced united arab emirates emerge corona crisis return normal life based numbers confirming emirates free epidemic decrease numbers infections deaths serious cases care reached safe level waiting minister health announcement	Positive Coping	positive reframing		0.179167	0.654167	0.168	0.067	0.765	0.802	0	0	1	0	19226	148	9034	5	9	0
42	42	1.44604e+18	2021-10-07	The lesson is in the end, and we believe that Kuwait has actually reached the safety zone, and the announcement of the end of the epidemic and the return to normal life did not remain. The UAE did, so the government, especially the Ministry of Health and the front rows, deserves thanks and appreciation. The interrogations that some intend to submit to the Minister of Health are rejected.	Al Mahboula	أحمد بودستور	إذا كنت ذا رأي فكن ذا عزيمة فإن فساد الرأي أن تترددا	lesson end believe kuwait actually reached safety zone announcement end epidemic return normal life remain uae did government especially ministry health front rows deserves thanks appreciation interrogations intend submit minister health rejected	Positive Coping	positive reframing		0.0875	0.4875	0.136	0.043	0.821	0.7269	0	0	0	0	19226	148	9034	5	8	0
40	40	1.4462e+18	2021-10-07	We say to the Minister of Health, Basil Al-Sabah, that the workers of the Ministry of Health deserve honor, not abuse. The technicians at the Bouftira Center were arbitrarily subjected to expatriate workers by transferring them to Al-Adan Hospital under the pretext of lack of need and replacing them with another staff, an excuse that is the ugliest of sins. Will the minister accept this injustice?	Al Mahboula	أحمد بودستور	إذا كنت ذا رأي فكن ذا عزيمة فإن فساد الرأي أن تترددا	say minister health basil al-sabah workers ministry health deserve honor abuse technicians bouftira center arbitrarily subjected expatriate workers transferring al-adan hospital pretext lack need replacing another staff excuse ugliest sins minister accept injustice	Negative Coping		denial	-0.08333	0.25	0.128	0.164	0.708	-0.6133	3	3	2	0	19226	148	9034	5	19	1
41	41	1.44607e+18	2021-10-07	It is strange that the government is taking thoughtful decisions despite its army of advisors. The Fatwa and Legislation Department has canceled the decision to ban work for expatriates. This confirms the recent decision and the Chamber of Commerce has the upper hand in the country. The head of the Chamber has rejected the decision. The Fatwa and Legislation have canceled it. God is the Helper.	Al Mahboula	أحمد بودستور	إذا كنت ذا رأي فكن ذا عزيمة فإن فساد الرأي أن تترددا	strange government taking thoughtful decisions despite army advisors fatwa legislation department canceled decision ban work expatriates confirms recent decision chamber commerce upper hand country head chamber rejected decision fatwa legislation canceled it god helper	Negative Coping		denial	0.0875	0.225	0.132	0.112	0.756	0.1531	0	0	1	0	19226	148	9034	5	11	1
39	39	1.4465e+18	2021-10-08	The Ministry of Health is corrupt. There are former health officials who were convicted and sentenced to prison due to corruption. Despite suspicions about the trade in masks, swabs, and respirators, and the opening of Corona treatment centers and the appointment of close associates, it has turned into an investment. There are ongoing crises in the Ministry of Health.	Al Mahboula	أحمد بودستور	إذا كنت ذا رأي فكن ذا عزيمة فإن فساد الرأي أن تترددا	ministry health corrupt former health officials convicted sentenced prison due corruption despite suspicions trade masks swabs respirators opening corona treatment centers appointment close associates turned investment ongoing crises ministry health	Negative Coping		denial	-0.20833	0.458333	0.034	0.07	0.896	-0.316	3	2	3	0	19226	148	9034	5	15	1
443	443	1.44687e+18	2021-10-09	@Boofa57882855 I’ll put my tongue back in. 1. It’s not a trial vaccine; 2. Everyone should have it-including politicians; 3. I would mandate it for all health workers, hospitality workers, teachers, transport, aged care, anyone working face-to-face with the public (including police).	Al Salmiyah	Ross Appleby	Aussie Ex-pat, mad Collingwood fan, living in the desert.	ill put my tongue back in its not a trial vaccine everyone should have itincluding politicians i would mandate it for all health workers hospitality workers teachers transport aged care anyone working facetoface with the public including police	Positive Coping	problem-solving		-0.15	0.366667	0.076	0.067	0.857	0.1027	0	2	1	0	151	178	1101	3	15	0
38	38	1.44784e+18	2021-10-12	The government's biggest mistake is applying the cadre system to employees on people and people. The biggest beneficiaries are workers in the oil sector. Their salaries have increased. The ministries grant specializations a cadre. The Ministry of Health has given doctors, pharmacists and nurses a cadre and has forgotten laboratory technicians, a rare specialty.	Al Mahboula	أحمد بودستور	إذا كنت ذا رأي فكن ذا عزيمة فإن فساد الرأي أن تترددا	government biggest mistake applying cadre system employees people people biggest beneficiaries workers oil sector salaries increased ministries grant specializations cadre ministry health given doctors pharmacists nurses cadre forgotten laboratory technicians rare specialty	Negative Coping		denial	0.3	0.9	0.122	0.071	0.807	0.4767	0	0	0	0	19226	148	9034	5	8	1
37	37	1.44905e+18	2021-10-15	After the UAE announced the abolition of health precautions and a return to normal life, the Kingdom of Saudi Arabia announced not wearing masks, open places and canceling distancing, restaurants and malls, attendance at stadiums and parties, as well as employees, and we are awaiting the Minister of Health’s announcement of the end of the Corona epidemic.	Al Mahboula	أحمد بودستور	إذا كنت ذا رأي فكن ذا عزيمة فإن فساد الرأي أن تترددا	uae announced abolition health precautions return normal life kingdom saudi arabia announced wearing masks open places canceling distancing restaurants malls attendance stadiums parties well employees awaiting minister health announcement end corona epidemic	Positive Coping	positive reframing		0.075	0.575	0.08	0	0.92	0.5859	0	0	2	0	19226	148	9034	5	16	0
36	36	1.44966e+18	2021-10-17	Today, the implementation of the decision of the Saudi Ministry of Health begins to cancel the health requirements for masks and distancing, especially the Two Holy Mosques. Prayer will return to what was before. This means an achievement to be counted for the Saudi government and Kuwait is just around the corner. The requirements will be canceled and a return to normal life. We hope that the dec…	Al Mahboula	أحمد بودستور	إذا كنت ذا رأي فكن ذا عزيمة فإن فساد الرأي أن تترددا	today implementation decision saudi ministry health begins cancel health requirements masks distancing especially two holy mosques prayer return before means achievement counted saudi government kuwait around corner requirements canceled return normal life hope decision soon	Positive Coping	positive reframing		0.116667	0.65	0.039	0.027	0.935	0.2263	0	0	0	0	19226	148	9034	5	8	0
35	35	1.45014e+18	2021-10-18	talalalyagout dr__vimto I wear a mask because of the smell of some people’s alcohol, the strongest of Corona’s women	Al Mahboula	Mohammad__	❤🇰🇼❤ 🤍 🇴🇲 🤍 🇮🇷 🤍 https://t.co/ntIruifk6l bayren munchin ⚽️⚽️⚽️	talalalyagout dr__vimto wear mask smell people alcohol strongest corona women	Positive Coping	mindfullness practices		0	0	0.139	0	0.861	0.4404	0	0	0	0	338	389	13221	0	16	0
34	34	1.45115e+18	2021-10-21	A crazy rise in real estate prices. Is it possible that during the Corona pandemic and the economic collapse in many countries of the world, our prices in general, especially real estate, have risen? The government banned real estate dealers from buying homes in residential areas and renting them, so prices would have fallen, but unfortunately it is a government of merchants, not simple citizens.	Al Mahboula	أحمد بودستور	إذا كنت ذا رأي فكن ذا عزيمة فإن فساد الرأي أن تترددا	crazy rise real estate prices possible corona pandemic economic collapse many countries world prices general especially real estate risen government banned real estate dealers buying homes residential areas renting them prices would fallen unfortunately government merchants simple citizens	Negative Coping		denial	0.045	0.565714	0	0.151	0.849	-0.8248	1	0	3	0	19226	148	9034	5	11	1
442	442	1.45103e+18	2021-10-21	@BBCWorld No kidding!.. is this going to be part two of COVID-19 movie⁉️	Kuwait	Muhammad Habib Bushehri بوحسين	كاتب صحفي ومحاضر كويتي🇰🇼مستقل ومدير سابق لدورات اللغة في بريطانيا Kuwaiti Journalist-writer-lecturer & previous English language Admin manger at the UK	no kidding is this going to be part two of covid movie exclamation question mark	Positive Coping	mindfullness practices		0	0	0	0.085	0.915	-0.0762	0	0	1	0	1177	60	7888	12	3	0
440	440	1.4515e+18	2021-10-22	The Largest Vaccination Drive completes 100 crore doses, Congratulations! Come become a part of it! #VaccineCentury	Al Nuwaiseeb	Satyendra Jaiswal	Growth is life 🇮🇳🚩	the largest vaccination drive completes crore doses congratulations come become a part of it vaccinecentury	Positive Coping	positive reframing		0	0	0.218	0	0.782	0.5994	0	0	0	0	65	48	4026	0	10	0
441	441	1.45148e+18	2021-10-22	@profshanecrotty Professor, I’m fully vaccinated with Pfizer since Feb 2021 and had a breakthrough infection on August, do I need a booster shot??	Bneid Al Qar	مبـارك الجـاسـم	التخلف يبقى تخلفاً . نحن في سباق مع الزمن ، إما أن نقتل التخلف أو يقتلنا التاريخ ! غازي عبد الرحمن القصيبي	professor im fully vaccinated with pfizer since feb and had a breakthrough infection on august do i need a booster shot	Positive Coping	engaging in relaxation techniques		0	0	0	0	1	0	0	0	0	0	491	590	21592	7	9	0
33	33	1.45275e+18	2021-10-25	Believe it or not, the news of the disappearance of a million masks from the Ministry of Health’s stores, worth a million, has spread. A few days ago, an artifact disappeared from the Kuwait Museum, and the hidden thing is greater. The honorable representatives, the National Assembly, will open its session on Tuesday. Request a committee to investigate the thefts and others.	Al Mahboula	أحمد بودستور	إذا كنت ذا رأي فكن ذا عزيمة فإن فساد الرأي أن تترددا	believe not news disappearance million masks ministry health stores worth million spread days ago artifact disappeared kuwait museum hidden thing greater honorable representatives national assembly open session tuesday request committee investigate thefts others	Negative Coping		denial	0.086667	0.306667	0.117	0.028	0.855	0.7184	0	0	0	0	19226	148	9034	5	21	1
32	32	1.45452e+18	2021-10-30	The director of the World Health Organization, who is always pessimistic, made a disturbing and terrifying statement. It is certain that a virus will appear and take over the world, and we will not be able to contain it. He asked for a billion expenses to confront Corona from poor countries, and we believe that the pessimist has remained in his position. The world is witnessing destructive viruse…	Al Mahboula	أحمد بودستور	إذا كنت ذا رأي فكن ذا عزيمة فإن فساد الرأي أن تترددا	director world health organization always pessimistic made disturbing terrifying statement certain virus appear take world able contain it asked billion expenses confront corona poor countries believe pessimist remained position world witnessing destructive viruses statements	Negative Coping		denial	-0.29762	0.699405	0.025	0.245	0.73	-0.9565	0	0	2	0	19226	148	9034	5	18	1
439	439	1.4546e+18	2021-10-30	I wear my smile like a mask Happy halloween 👻	Khaitan	y.Albuti	ACEH|UAB|kazma gymnastics team|	i wear my smile like a mask happy halloween ghost	Positive Coping	mindfullness practices		0.55	0.55	0.512	0.135	0.353	0.7506	0	0	0	0	38	46	807	0	23	0
31	31	1.4571e+18	2021-11-06	I strongly agree. He rolls on the floor from laughter. He rolls on the floor from laughter. You want the reward. Any good, God willing. Today is the date of your celebration next year. He rolls on the floor from laughter. He rolls on the floor from laughter. Reward_forward_rows_Kuwait Ministry_of_Health tcoe tgs l s	Al Mahboula	̥͖̜̫J. ALQattan	‏‏‏‏‏‏ ‏( باحث في الأرصاد الجوية) (Researcher in Meteorology) موظف في الصفوف الأمامية employees in front lines	strongly agree rolls floor laughter rolls floor laughter want reward good god willing today date celebration next year rolls floor laughter rolls floor laughter reward_forward_rows_kuwait ministry_of_health	Positive Coping	mindfullness practices		0.345833	0.520833	0.414	0	0.586	0.9806	2	0	0	0	179	52	6328	0	21	0
[truncated: 203 more rows]
